# Supplementary material for: Notch1-CD22-Dependent Immune Dysregulation in the SARS-CoV2-Associated Multisystem Inflammatory Syndrome in Children
Source: Research Square preprint supplement (doi:10.21203/rs.3.rs-1054453/v1), 2022-04-11
Supplement: Supplementary file 1 [file 4b9a5b3e1bac1c7b059808bf.xlsx]

## Sheet: Sheet1
Gene	Model	chr	start	end	Ref	Alt	hom_het	AA.Coord	AAChange
'A2ML1'	Compound-het-het	12	9001496	9001496	T	C	het	c.T541C:c.T664C:c.T2014C	p.F181L:p.F222L:p.F672L
'A2ML1'	Compound-het-het	12	9002268	9002268	G	T	het	c.G559T:c.G682T:c.G2032T	p.V187L:p.V228L:p.V678L
'AAAS'	Compound-het-het	12	53701317	53701317	C	T	het	c.G1498A:c.G1225A:c.G1597A	p.G500R:p.G409R:p.G533R
'AAAS'	Compound-het-het	12	53701399	53701399	A	G	het	c.T950C	p.L317P
'AAAS'	Compound-het-het	12	53701317	53701317	C	T	het	c.G1498A:c.G1225A:c.G1597A	p.G500R:p.G409R:p.G533R
'AAAS'	Compound-het-het	12	53701399	53701399	A	G	het	c.T950C	p.L317P
'AANAT'	Compound-het-het	17	74465381	74465381	C	G	het	c.C404G:c.C290G:c.C425G	p.S135W:p.S97W:p.S142W
'AATK'	Compound-het-het	17	79095707	79095707	G	A	het	c.C1720T:c.C2029T:c.C1921T	p.H574Y:p.H677Y:p.H641Y
'AATK'	Compound-het-het	17	79096175	79096175	C	G	het	c.G1252C:c.G1561C:c.G1453C	p.A418P:p.A521P:p.A485P
'AATK'	Compound-het-het	17	79095707	79095707	G	A	het	c.C1720T:c.C2029T:c.C1921T	p.H574Y:p.H677Y:p.H641Y
'AATK'	Compound-het-het	17	79096175	79096175	C	G	het	c.G1252C:c.G1561C:c.G1453C	p.A418P:p.A521P:p.A485P
'AB231731'	Compound-het-het	11	59969177	59969177	C	T	het	c.G454A	p.V152I
'AB231731'	Compound-het-het	11	59969278	59969278	G	A	het	c.C353T	p.P118L
'ABC7-42389800N19.1'	Compound-het-het	12	87591	87591	A	G	het	c.A296G	p.H99R
'ABC7-42389800N19.1'	Compound-het-het	12	89758	89758	G	A	het	c.G523A:c.G518A	p.G175S:p.R173Q
'ABC7-42389800N19.1'	Compound-het-het	12	78923	78923	G	A	het	c.G133A	p.G45R
'ABC7-42389800N19.1'	Compound-het-het	12	88892	88892	C	T	het	c.C313T	p.P105S
'ABC7-42389800N19.1'	Compound-het-het	12	88916	88916	C	T	het	c.C337T	p.P113S
'ABC7-42389800N19.1'	Compound-het-het	12	88892	88892	C	T	het	c.C313T	p.P105S
'ABC7-42389800N19.1'	Compound-het-het	12	88916	88916	C	T	het	c.C337T	p.P113S
'ABC7-42389800N19.1'	Compound-het-het	12	88892	88892	C	T	het	c.C313T	p.P105S
'ABC7-42389800N19.1'	Compound-het-het	12	88916	88916	C	T	het	c.C337T	p.P113S
'ABC7-42389800N19.1'	Compound-het-het	12	88892	88892	C	T	het	c.C313T	p.P105S
'ABC7-42389800N19.1'	Compound-het-het	12	88916	88916	C	T	het	c.C337T	p.P113S
'ABCA1'	Compound-het-het	9	107555077	107555077	T	G	het	c.A5747C	p.E1916A
'ABCA1'	Compound-het-het	9	107555077	107555077	T	G	het	c.A5747C	p.E1916A
'ABCA12'	Compound-het-het	2	215840624	215840624	C	T	het	c.G4312A:c.G5266A	p.V1438I:p.V1756I
'ABCA12'	Compound-het-het	2	215884364	215884364	C	T	het	c.G490A:c.G1444A	p.E164K:p.E482K
'ABCA12'	Compound-het-het	2	215840624	215840624	C	T	het	c.G4312A:c.G5266A	p.V1438I:p.V1756I
'ABCA12'	Compound-het-het	2	215884364	215884364	C	T	het	c.G490A:c.G1444A	p.E164K:p.E482K
'ABCA12'	Compound-het-het	2	215835070	215835070	C	T	het	c.G4663A:c.G5617A	p.V1555I:p.V1873I
'ABCA12'	Compound-het-het	2	215876165	215876165	G	A	het	c.C1376T:c.C2330T	p.S459F:p.S777F
'ABCA12'	Compound-het-het	2	215940274	215940274	T	C	het	c.A230G	p.N77S
'ABCA12'	Compound-het-het	2	215855569	215855569	T	A	het	c.A2527T:c.A3481T	p.M843L:p.M1161L
'ABCA12'	Compound-het-het	2	215890462	215890462	A	G	het	c.T268C:c.T1222C	p.S90P:p.S408P
'ABCA12'	Compound-het-het	2	215882771	215882771	G	C	het	c.C789G:c.C1743G	p.D263E:p.D581E
'ABCA12'	Compound-het-het	2	215891583	215891583	C	G	het	c.G187C:c.G1141C	p.V63L:p.V381L
'ABCA13'	Compound-het-het	7	48308592	48308592	C	T	het	c.C2021T	p.S674F
'ABCA13'	Compound-het-het	7	48547565	48547565	G	T	het	c.G763T:c.G634T:c.G13444T	p.V255L:p.V212L:p.V4482L
'ABCA13'	Compound-het-het	7	48390318	48390318	C	G	het	c.C10283G	p.S3428C
'ABCA13'	Compound-het-het	7	48887910	48887910	A	T	het	c.A410T	p.X137L
'ABCA13'	Compound-het-het	7	48887751	48887751	C	A	het	c.C251A	p.A84D
'ABCA13'	Compound-het-het	7	48887771	48887771	G	C	het	c.G271C	p.A91P
'ABCA13'	Compound-het-het	7	48318680	48318680	A	G	het	c.A7889G	p.D2630G
'ABCA13'	Compound-het-het	7	48547565	48547565	G	T	het	c.G763T:c.G634T:c.G13444T	p.V255L:p.V212L:p.V4482L
'ABCA13'	Compound-het-het	7	48314389	48314389	T	C	het	c.T5126C	p.L1709P
'ABCA13'	Compound-het-het	7	48353901	48353901	G	C	het	c.G9754C	p.D3252H
'ABCA4'	Compound-het-het	1	94506871	94506871	T	C	het	c.A3416G	p.Y1139C
'ABCA4'	Compound-het-het	1	94528143	94528143	C	T	het	c.G1927A	p.V643M
'ABCA5'	Compound-het-het	17	67281555	67281555	G	C	het	c.C188G:c.C1292G	p.A63G:p.A431G
'ABCA7'	Compound-het-het	19	1058184	1058184	C	T	het	c.C4651T:c.C5065T	p.L1551F:p.L1689F
'ABCA7'	Compound-het-het	19	1058184	1058184	C	T	het	c.C4651T:c.C5065T	p.L1551F:p.L1689F
'ABCA7'	Compound-het-het	19	1046404	1046404	G	A	het	c.G1207A:c.G1621A	p.V403M:p.V541M
'ABCA8'	Compound-het-het	17	66873709	66873709	C	T	het	c.G4030A:c.G4150A	p.A1344T:p.A1384T
'ABCA8'	Compound-het-het	17	66879965	66879965	C	T	het	c.G3554A:c.G3674A	p.G1185E:p.G1225E
'ABCA9'	Compound-het-het	17	66981234	66981234	T	C	het	c.A4130G:c.A4244G	p.K1377R:p.K1415R
'ABCA9'	Compound-het-het	17	67031829	67031829	G	C	het	c.C914G	p.T305S
'ABCB1'	Compound-het-het	7	87174218	87174218	A	C	het	c.T1793G:c.T1985G	p.L598R:p.L662R
'ABCB1'	Compound-het-het	7	87214848	87214848	A	G	het	c.T266C	p.M89T
'ABCC12'	Compound-het-het	16	48149369	48149369	G	A	het	c.C1873T:c.C1772T:c.C1946T	p.R625C:p.T591M:p.T649M
'ABCC12'	Compound-het-het	16	48173126	48173126	C	A	het	c.G779T	p.G260V
'ABCC12'	Compound-het-het	16	48149369	48149369	G	A	het	c.C1873T:c.C1772T:c.C1946T	p.R625C:p.T591M:p.T649M
'ABCC12'	Compound-het-het	16	48173126	48173126	C	A	het	c.G779T	p.G260V
'ABCC12'	Compound-het-het	16	48149369	48149369	G	A	het	c.C1873T:c.C1772T:c.C1946T	p.R625C:p.T591M:p.T649M
'ABCC12'	Compound-het-het	16	48173126	48173126	C	A	het	c.G779T	p.G260V
'ABCC12'	Compound-het-het	16	48149369	48149369	G	A	het	c.C1873T:c.C1772T:c.C1946T	p.R625C:p.T591M:p.T649M
'ABCC12'	Compound-het-het	16	48173126	48173126	C	A	het	c.G779T	p.G260V
'ABCC12'	Compound-het-het	16	48149369	48149369	G	A	het	c.C1873T:c.C1772T:c.C1946T	p.R625C:p.T591M:p.T649M
'ABCC12'	Compound-het-het	16	48149369	48149369	G	A	het	c.C1873T:c.C1772T:c.C1946T	p.R625C:p.T591M:p.T649M
'ABCC12'	Compound-het-het	16	48173126	48173126	C	A	het	c.G779T	p.G260V
'ABCC3'	Compound-het-het	17	48741111	48741111	G	A	het	c.G1068A:c.G1123A	p.M356I:p.V375I
'ABCC3'	Compound-het-het	17	48750427	48750427	C	T	het	c.C95T	p.P32L
'ABCC6'	Compound-het-het	16	16248791	16248791	C	T	het	c.G3980A	p.G1327E
'ABCC6'	Compound-het-het	16	16297310	16297310	T	C	het	c.A955G	p.I319V
'ABCC6'	Compound-het-het	16	16248791	16248791	C	T	het	c.G3980A	p.G1327E
'ABCC6'	Compound-het-het	16	16297310	16297310	T	C	het	c.A955G	p.I319V
'ABI3BP'	Compound-het-het	3	100489702	100489702	C	A	het	c.G2493T:c.G2355T:c.G4599T	p.G831G:p.G785G:p.G1533G
'ABI3BP'	Compound-het-het	3	100568897	100568897	G	A	het	c.C1367T:c.C1514T	p.T456M:p.T505M
'ABI3BP'	Compound-het-het	3	100489702	100489702	C	A	het	c.G2493T:c.G2355T:c.G4599T	p.G831G:p.G785G:p.G1533G
'ABI3BP'	Compound-het-het	3	100568897	100568897	G	A	het	c.C1367T:c.C1514T	p.T456M:p.T505M
'ABI3BP'	Compound-het-het	3	100506641	100506641	T	C	het	c.A4066G	p.N1356D
'ABI3BP'	Compound-het-het	3	100511585	100511585	G	A	het	c.C1916T:c.C1778T:c.C3947T	p.P639L:p.P593L:p.P1316L
'ABLIM2'	Compound-het-het	4	8022021	8022021	C	T	het	c.G581A:c.G1178A:c.G1277A	p.S194N:p.S393N:p.S426N
'ABPARTS'	Compound-het-het	2	89544557	89544557	C	T	het	c.G67A	p.V23M
'ABPARTS'	Compound-het-het	2	90139444	90139444	C	T	het	c.C215T	p.A72V
'ABPARTS'	Compound-het-het	2	90153984	90153984	T	C	het	c.T71C	p.M24T
'ABPARTS'	Compound-het-het	14	106967122	106967122	G	A	het	c.C278T	p.T93M
'ABPARTS'	Compound-het-het	14	107131078	107131078	C	T	het	c.G303A	p.M101I
'ABPARTS'	Compound-het-het	14	107131305	107131305	A	T	het	c.T76A	p.S26T
'ABPARTS'	Compound-het-het	14	106173640	106173640	G	C	het	c.C927G	p.D309E
'ABPARTS'	Compound-het-het	14	106174188	106174188	T	C	het	c.A601G	p.T201A
'ABPARTS'	Compound-het-het	2	89986367	89986367	C	G	het	c.C16G	p.Q6E
'ABPARTS'	Compound-het-het	14	106209233	106209233	G	T	het	c.C176A	p.S59Y
'ABPARTS'	Compound-het-het	14	106926363	106926363	G	A	het	c.C179T	p.P60L
'ABPARTS'	Compound-het-het	2	89292143	89292143	G	A	het	c.C130T	p.R44W
'ABPARTS'	Compound-het-het	2	89567969	89567969	G	A	het	c.C140T	p.A47V
'ABPARTS'	Compound-het-het	14	106091341	106091341	C	T	het	c.G553A	p.V185I
'ABPARTS'	Recessive	14	107179005	107179005	T	C	hom	c.A172G	p.I58V
'ABPARTS'	Compound-het-het	14	106471421	106471421	G	T	het	c.C176A	p.A59D
'ABPARTS'	Compound-het-het	14	106573357	106573357	-	TAA	het	c.226_227insTTA	p.S75_T76insI
'ABPARTS'	Compound-het-het	14	106573357	106573357	G	C	het	c.C227G	p.T76S
'ABPARTS'	Compound-het-het	22	22895238	22895238	G	T	het	c.C156A	p.S52R
'ABPARTS'	Compound-het-het	14	106173524	106173524	A	G	het	c.T1043C	p.V348A
'ABPARTS'	Compound-het-het	14	106173573	106173573	A	T	het	c.T994A	p.L332M
'ABPARTS'	Compound-het-het	14	106174984	106174984	T	C	het	c.A19G	p.K7E
'ABPARTS'	Compound-het-het	14	106471383	106471383	C	T	het	c.G214A	p.A72T
'ABPARTS'	Compound-het-het	22	22786751	22786753	GAG	-	het	c.301_303del	p.E101del
'ABPARTS'	Compound-het-het	22	23090324	23090324	T	C	het	c.T263C	p.I88T
'ABPARTS'	Compound-het-het	14	106091352	106091352	C	T	het	c.G542A	p.R181H
'ABPARTS'	Compound-het-het	14	106926435	106926435	G	A	het	c.C107T	p.S36F
'ABPARTS'	Compound-het-het	14	106573357	106573357	-	TAA	het	c.226_227insTTA	p.S75_T76insI
'ABPARTS'	Compound-het-het	14	106573357	106573357	G	C	het	c.C227G	p.T76S
'ABPARTS'	Compound-het-het	14	107170327	107170329	GCT	-	het	c.39_41del	p.A14del
'ABPARTS'	Compound-het-het	22	22937050	22937050	C	T	het	c.C14T	p.P5L
'ABPARTS'	Compound-het-het	22	23162202	23162202	G	A	het	c.G295A	p.G99R
'ABPARTS'	Compound-het-het	22	22682057	22682057	C	G	het	c.C239G	p.P80R
'ABPARTS'	Compound-het-het	22	22698031	22698031	G	A	het	c.G319A	p.E107K
'ABPARTS'	Compound-het-het	22	22937479	22937479	T	A	het	c.T297A	p.D99E
'ABPARTS'	Compound-het-het	14	107083398	107083398	T	C	het	c.A206G	p.Y69C
'ABPARTS'	Compound-het-het	14	107083399	107083399	A	T	het	c.T205A	p.Y69N
'ABPARTS'	Compound-het-het	14	107131218	107131218	A	G	het	c.T163C	p.W55R
'ABPARTS'	Compound-het-het	22	22556577	22556577	G	T	het	c.G391T	p.V131F
'ABPARTS'	Compound-het-het	2	89891177	89891177	G	A	het	c.G182A:c.G206A	p.R61Q:p.R69Q
'ABPARTS'	Compound-het-het	2	89891185	89891185	G	T	het	c.G190T:c.G214T	p.G64X:p.G72X
'ABPARTS'	Compound-het-het	14	107078423	107078423	C	T	het	c.G301A	p.E101K
'ABPARTS'	Compound-het-het	14	106091263	106091263	A	G	het	c.T631C	p.S211P
'ABPARTS'	Compound-het-het	14	106091266	106091266	A	C	het	c.T628G	p.S210A
'ABPARTS'	Compound-het-het	14	106091274	106091274	C	G	het	c.G620C	p.G207A
'ABPARTS'	Compound-het-het	14	106359404	106359404	-	TTGTAG	het	c.15_16insCTACAA	p.M5_V6insLQ
'ABPARTS'	Compound-het-het	22	22749576	22749576	G	A	het	c.G100A	p.G34R
'ABPARTS'	Compound-het-het	22	22749644	22749644	G	A	het	c.G168A	p.W56X
'ABPARTS'	Compound-het-het	22	23077468	23077468	G	A	het	c.G245A	p.R82H
'AC003005.4'	Compound-het-het	19	58002851	58002851	T	-	het	c.49delT:c.46delT:c.85delT:c.88delT	p.F17Lfs*27:p.F16Lfs*27:p.F29Lfs*27:p.F30Lfs*27
'AC003005.4'	Compound-het-het	19	58002863	58002863	G	A	het	c.G61A:c.G58A:c.G97A:c.G100A	p.A21T:p.A20T:p.A33T:p.A34T
'AC004017.1'	Compound-het-het	19	58204020	58204020	G	A	het	c.C109T	p.R37C
'AC004017.1'	Compound-het-het	19	58204038	58204038	A	C	het	c.T91G	p.F31V
'AC004899.1'	Compound-het-het	7	48887751	48887751	C	A	het	c.C251A	p.A84D
'AC004899.1'	Compound-het-het	7	48887771	48887771	G	C	het	c.G271C	p.A91P
'AC005013.1'	Compound-het-het	7	28995807	28995807	C	T	het	.	.
'AC005013.1'	Compound-het-het	7	28995823	28995823	G	C	het	.	.
'AC005013.1'	Compound-het-het	7	28995807	28995807	C	T	het	.	.
'AC005013.1'	Compound-het-het	7	28995823	28995823	G	C	het	.	.
'AC005013.1'	Compound-het-het	7	28995807	28995807	C	T	het	.	.
'AC005013.1'	Compound-het-het	7	28995823	28995823	G	C	het	.	.
'AC011718.2'	Recessive	22	20640814	20640814	A	T	hom	c.T563A	p.V188D
'AC020952.1'	Compound-het-het	19	31640466	31640466	-	GCCC	het	c.105_106insGCCC	p.P36Afs*18
'AC020952.1'	Compound-het-het	19	31640485	31640485	G	C	het	c.G124C	p.A42P
'AC020952.1'	Compound-het-het	19	31640466	31640466	-	GCCC	het	c.105_106insGCCC	p.P36Afs*18
'AC020952.1'	Compound-het-het	19	31640485	31640485	G	C	het	c.G124C	p.A42P
'AC020952.1'	Compound-het-het	19	31640466	31640466	-	GCCC	het	c.105_106insGCCC	p.P36Afs*18
'AC020952.1'	Compound-het-het	19	31640485	31640485	G	C	het	c.G124C	p.A42P
'AC020952.1'	Compound-het-het	19	31640466	31640466	-	GCCCC	het	c.105_106insGCCCC	p.P36Afs*11
'AC020952.1'	Compound-het-het	19	31640485	31640485	G	C	het	c.G124C	p.A42P
'AC020952.1'	Compound-het-het	19	31640466	31640466	-	GC	het	c.105_106insGC	p.P36Afs*10
'AC020952.1'	Compound-het-het	19	31640485	31640485	G	C	het	c.G124C	p.A42P
'AC023490.1'	Recessive	22	20378905	20378905	C	T	hom	c.C491T	p.P164L
'AC023490.1'	Recessive	22	20378905	20378905	C	T	hom	c.C491T	p.P164L
'AC026150.6'	Recessive	15	30815140	30815140	A	G	hom	c.T106C	p.S36P
'AC026150.6'	Recessive	15	30815140	30815140	A	G	hom	c.T106C	p.S36P
'AC026150.8'	Recessive	15	30815140	30815140	A	G	hom	c.T106C	p.S36P
'AC026150.8'	Recessive	15	30815140	30815140	A	G	hom	c.T106C	p.S36P
'AC027763.2'	Compound-het-het	17	6888816	6888816	C	A	het	c.G141T	p.W47C
'AC068620.1'	Recessive	4	57277066	57277066	A	-	hom	c.385delA	p.K138Rfs*12
'AC073333.1'	Recessive	7	16829206	16829206	G	A	hom	c.G341A	p.R114Q
'AC073333.1'	Recessive	7	16829210	16829210	T	-	hom	c.345delT	p.G116Vfs*11
'AC073333.1'	Recessive	7	16829134	16829134	T	C	hom	c.T269C	p.L90P
'AC073333.1'	Recessive	7	16829092	16829092	A	G	hom	c.A227G	p.Q76R
'AC073333.1'	Recessive	7	16829134	16829134	T	C	hom	c.T269C	p.L90P
'AC079354.1'	Compound-het-het	2	202974464	202974464	A	T	het	c.A463T:c.A1708T	p.S155C:p.S570C
'AC079354.1'	Compound-het-het	2	203003206	203003206	C	T	het	c.C632T	p.P211L
'AC079354.1'	Compound-het-het	2	202974464	202974464	A	T	het	c.A463T:c.A1708T	p.S155C:p.S570C
'AC079354.1'	Compound-het-het	2	203003206	203003206	C	T	het	c.C632T	p.P211L
'AC087645.1'	Compound-het-het	17	76219646	76219646	C	T	het	c.C322T:c.G634A	p.R108W:p.G212S
'AC087645.1'	Compound-het-het	17	76220609	76220609	G	A	het	c.C128T	p.A43V
'AC091801.1'	Compound-het-het	7	3180566	3180566	T	C	het	c.A68G	p.E23G
'AC092850.1'	Compound-het-het	12	131781110	131781110	G	A	het	c.G170A	p.R57Q
'AC092850.1'	Compound-het-het	12	131781121	131781121	-	G	het	c.181dupG	p.S63Qfs*2
'AC092850.1'	Compound-het-het	12	131781319	131781319	A	C	het	c.A379C	p.M127L
'AC092850.1'	Compound-het-het	12	131781520	131781520	C	T	het	c.C580T	p.P194S
'AC104809.3'	Compound-het-het	2	241889808	241889808	C	A	het	c.C2392A	p.Q798K
'AC104809.3'	Compound-het-het	2	241889808	241889808	C	A	het	c.C2392A	p.Q798K
'AC104809.3'	Compound-het-het	2	241874916	241874916	G	A	het	c.G1762A	p.G588R
'AC104809.3'	Compound-het-het	2	241903153	241903153	C	T	het	c.C2950T	p.R984W
'AC104809.3'	Compound-het-het	2	241874916	241874916	G	A	het	c.G1762A	p.G588R
'AC104809.3'	Compound-het-het	2	241903153	241903153	C	T	het	c.C2950T	p.R984W
'AC104809.3'	Compound-het-het	2	241873755	241873755	C	G	het	c.C1336G	p.R446G
'AC104809.3'	Compound-het-het	2	241874968	241874968	G	A	het	c.G1814A	p.G605E
'AC124309.1'	Compound-het-het	15	23891586	23891586	G	A	het	c.C1304T	p.P435L
'AC124309.1'	Compound-het-het	15	23891598	23891598	C	G	het	c.G1292C	p.R431P
'AC124309.1'	Compound-het-het	15	23891586	23891586	G	A	het	c.C1304T	p.P435L
'AC124309.1'	Compound-het-het	15	23891598	23891598	C	G	het	c.G1292C	p.R431P
'AC131097.3'	Compound-het-het	2	242946150	242946150	G	A	het	c.G151A	p.G51R
'AC131097.3'	Compound-het-het	2	242946175	242946175	-	TAAA	het	c.176_177insTAAA	p.G60Kfs*142
'AC136604.1'	Compound-het-het	5	179078891	179078891	T	C	het	c.T374C	p.L125P
'AC136604.1'	Compound-het-het	5	179079372	179079372	C	T	het	c.C488T	p.T163I
'AC137056.1'	Compound-het-het	16	20499781	20499784	ACAT	-	het	c.240_243del	p.H81Qfs*28
'AC137056.1'	Compound-het-het	16	20499817	20499817	-	AGAGAGAGAG	het	c.276_277insAGAGAGAGAG	p.E93Rfs*19
'AC187652.1'	Recessive	7	303279	303279	C	G	hom	c.C356G	p.A119G
'AC187652.1'	Recessive	7	303279	303279	C	G	hom	c.C356G	p.A119G
'ACAD10'	Compound-het-het	12	112184865	112184865	T	C	het	c.T1075C:c.T2269C:c.T2362C	p.S359P:p.S757P:p.S788P
'ACAD10'	Compound-het-het	12	112187140	112187140	G	A	het	c.G2808A:c.G2901A	p.M936I:p.M967I
'ACAD10'	Compound-het-het	12	112184865	112184865	T	C	het	c.T1075C:c.T2269C:c.T2362C	p.S359P:p.S757P:p.S788P
'ACAD10'	Compound-het-het	12	112187140	112187140	G	A	het	c.G2808A:c.G2901A	p.M936I:p.M967I
'ACAD10'	Compound-het-het	12	112184865	112184865	T	C	het	c.T1075C:c.T2269C:c.T2362C	p.S359P:p.S757P:p.S788P
'ACAD10'	Compound-het-het	12	112187140	112187140	G	A	het	c.G2808A:c.G2901A	p.M936I:p.M967I
'ACAD10'	Compound-het-het	12	112184865	112184865	T	C	het	c.T1075C:c.T2269C:c.T2362C	p.S359P:p.S757P:p.S788P
'ACAD10'	Compound-het-het	12	112187140	112187140	G	A	het	c.G2808A:c.G2901A	p.M936I:p.M967I
'ACAD10'	Compound-het-het	12	112184865	112184865	T	C	het	c.T1075C:c.T2269C:c.T2362C	p.S359P:p.S757P:p.S788P
'ACAD10'	Compound-het-het	12	112187140	112187140	G	A	het	c.G2808A:c.G2901A	p.M936I:p.M967I
'ACADL'	Compound-het-het	2	211070421	211070421	C	T	het	c.G703A	p.V235M
'ACADL'	Compound-het-het	2	211089914	211089914	G	A	het	c.C74T	p.A25V
'ACADL'	Compound-het-het	2	211070421	211070421	C	T	het	c.G703A	p.V235M
'ACADL'	Compound-het-het	2	211089914	211089914	G	A	het	c.C74T	p.A25V
'ACAT1'	Compound-het-het	11	108005874	108005874	C	T	het	c.C340T:c.C70T	p.P114S:p.P24S
'ACE'	Compound-het-het	17	61559924	61559924	G	A	het	c.G1216A	p.V406I
'ACE'	Compound-het-het	17	61560501	61560501	C	G	het	c.C1454G	p.P485R
'ACE'	Compound-het-het	17	61564005	61564005	A	G	het	c.A424G:c.A76G:c.A2146G	p.T142A:p.T26A:p.T716A
'ACHE'	Compound-het-het	7	100549517	100549517	C	T	het	c.C98T	p.P33L
'ACHE'	Compound-het-het	7	100491685	100491685	C	T	het	c.G169A	p.G57R
'ACOT11'	Compound-het-het	1	55060298	55060298	C	T	het	c.C541T	p.R181W
'ACOT11'	Compound-het-het	1	55070089	55070089	C	T	het	c.C1223T	p.S408L
'ACOT11'	Compound-het-het	1	55060298	55060298	C	T	het	c.C541T	p.R181W
'ACOT11'	Compound-het-het	1	55070089	55070089	C	T	het	c.C1223T	p.S408L
'ACOT11'	Compound-het-het	1	55072856	55072856	G	A	het	c.G1420A	p.V474I
'ACOT13'	Compound-het-het	6	24701727	24701733	ACAGCAC	-	het	c.307_313del:c.238_244del	p.T103Mfs*3:p.T80Mfs*3
'ACOT13'	Compound-het-het	6	24701736	24701736	G	C	het	c.G316C:c.G247C	p.V106L:p.V83L
'ACOX3'	Compound-het-het	4	8390998	8390998	C	G	het	c.G1439C	p.R480P
'ACOX3'	Compound-het-het	4	8407723	8407723	G	A	het	c.C735T	p.G245G
'ACOX3'	Compound-het-het	4	8416599	8416599	T	C	het	c.A150G:c.A435G	p.Q50Q:p.Q145Q
'ACOX3'	Compound-het-het	4	8358666	8358666	A	G	het	c.T424C	p.F142L
'ACOX3'	Compound-het-het	4	8358672	8358676	AGGTG	-	het	c.414_418del	p.T139Lfs*161
'ACOX3'	Compound-het-het	4	8372686	8372686	G	A	het	c.C1864T	p.R622C
'ACOX3'	Compound-het-het	4	8390998	8390998	C	G	het	c.G1439C	p.R480P
'ACOX3'	Compound-het-het	4	8372686	8372686	G	A	het	c.C1864T	p.R622C
'ACOX3'	Compound-het-het	4	8390998	8390998	C	G	het	c.G1439C	p.R480P
'ACOX3'	Compound-het-het	4	8372686	8372686	G	A	het	c.C1864T	p.R622C
'ACOX3'	Compound-het-het	4	8390998	8390998	C	G	het	c.G1439C	p.R480P
'ACOXL'	Compound-het-het	2	111875307	111875307	G	A	het	c.G1657A	p.A553T
'ACOXL'	Compound-het-het	2	111875307	111875307	G	A	het	c.G1657A	p.A553T
'ACSL3'	Compound-het-het	2	223789292	223789292	G	A	het	c.G581A:c.G1271A	p.R194H:p.R424H
'ACSL3'	Compound-het-het	2	223789309	223789309	G	A	het	c.G598A:c.G1288A	p.D200N:p.D430N
'ACSM2A'	Compound-het-het	16	20499781	20499784	ACAT	-	het	c.240_243del	p.H81Qfs*28
'ACSM2A'	Compound-het-het	16	20499817	20499817	-	AGAGAGAGAG	het	c.276_277insAGAGAGAGAG	p.E93Rfs*19
'ACTE1P'	Compound-het-het	11	71118730	71118730	G	A	het	c.C89T	p.P30L
'ACTE1P'	Compound-het-het	11	71118760	71118760	G	A	het	c.C59T	p.A20V
'ACTN3'	Compound-het-het	11	66314511	66314511	C	A	het	c.C103A	p.R35S
'ACTN3'	Compound-het-het	11	66330524	66330524	G	T	het	.	.
'ACTN3'	Compound-het-het	11	66330525	66330525	A	T	het	.	.
'ACTN3'	Compound-het-het	11	66314511	66314511	C	A	het	c.C103A	p.R35S
'ACTN3'	Compound-het-het	11	66330524	66330524	G	T	het	.	.
'ACTN3'	Compound-het-het	11	66330525	66330525	A	T	het	.	.
'ACTN3'	Compound-het-het	11	66330599	66330599	G	T	het	.	.
'ACTN4'	Compound-het-het	19	39212393	39212393	G	A	het	uc010egc.2:c.G1507A	p.G503S
'ACTR3C'	Compound-het-het	7	149586084	149586084	T	C	het	c.A182G:c.A356G:c.A326G	p.H61R:p.H119R:p.H109R
'ACTR3C'	Compound-het-het	7	150020563	150020563	G	C	het	c.C241G:c.C100G	p.R81G:p.R34G
'ACY3'	Compound-het-het	11	67412537	67412537	A	G	het	c.T250C:c.T613C	p.F84L:p.F205L
'ACY3'	Compound-het-het	11	67412839	67412839	C	T	het	c.G82A:c.G445A	p.E28K:p.E149K
'AD000090.2'	Compound-het-het	19	36036126	36036126	C	T	het	c.G266A	p.G89E
'AD000090.2'	Compound-het-het	19	36036126	36036126	C	T	het	c.G266A	p.G89E
'AD000090.2'	Compound-het-het	19	36036126	36036126	C	T	het	c.G266A	p.G89E
'ADAM28'	Compound-het-het	8	24157589	24157589	A	G	het	c.A149G	p.Q50R
'ADAM28'	Compound-het-het	8	24170956	24170956	C	A	het	c.C439A	p.H147N
'ADAM32'	Compound-het-het	8	39027494	39027494	G	T	het	c.G914T:c.G893T	p.R305L:p.R298L
'ADAM32'	Compound-het-het	8	39091546	39091546	G	A	het	c.G1466A:c.G1445A:c.G1763A	p.R489Q:p.R482Q:p.R588Q
'ADAM32'	Compound-het-het	8	38965324	38965324	G	A	het	c.G131A	p.G44D
'ADAM32'	Compound-het-het	8	39103683	39103683	G	A	het	c.G1603A:c.G1582A:c.G1900A	p.G535R:p.G528R:p.G634R
'ADAM6'	Compound-het-het	14	106471421	106471421	G	T	het	c.C176A	p.A59D
'ADAM6'	Compound-het-het	14	106573357	106573357	-	TAA	het	c.226_227insTTA	p.S75_T76insI
'ADAM6'	Compound-het-het	14	106573357	106573357	G	C	het	c.C227G	p.T76S
'ADAM6'	Compound-het-het	14	106436899	106436899	C	G	het	c.G141C	p.E47D
'ADAM6'	Compound-het-het	14	106471383	106471383	C	T	het	c.G214A	p.A72T
'ADAM6'	Compound-het-het	14	106573357	106573357	-	TAA	het	c.226_227insTTA	p.S75_T76insI
'ADAM6'	Compound-het-het	14	106573357	106573357	G	C	het	c.C227G	p.T76S
'ADAM8'	Compound-het-het	10	135084481	135084481	C	T	het	c.G1351A:c.G1468A	p.A451T:p.A490T
'ADAM8'	Compound-het-het	10	135087295	135087295	G	A	het	c.C250T	p.R84C
'ADAM8'	Compound-het-het	10	135083463	135083463	G	A	het	c.C1801T	p.R601C
'ADAM8'	Compound-het-het	10	135084006	135084007	AT	-	het	c.1525_1526del:c.1642_1643del	p.M509Vfs*35:p.M548Vfs*35
'ADAM8'	Compound-het-het	10	135083463	135083463	G	A	het	c.C1801T	p.R601C
'ADAM8'	Compound-het-het	10	135084006	135084007	AT	-	het	c.1525_1526del:c.1642_1643del	p.M509Vfs*35:p.M548Vfs*35
'ADAM9'	Compound-het-het	8	38912091	38912091	G	A	het	c.G1394A	p.R465Q
'ADAMTS13'	Compound-het-het	9	136297743	136297743	C	T	het	c.C38T:c.C721T:c.C1022T:c.C929T	p.P13L:p.R241C:p.P341L:p.P310L
'ADAMTS17'	Compound-het-het	15	100591884	100591884	G	A	het	c.C2348T	p.P783L
'ADAMTS17'	Compound-het-het	15	100591884	100591884	G	A	het	c.C2348T	p.P783L
'ADAMTS18'	Compound-het-het	16	77327005	77327005	G	A	het	c.C3157T	p.R1053W
'ADAMTS18'	Compound-het-het	16	77331235	77331235	T	C	het	c.A2752G	p.K918E
'ADAMTS18'	Compound-het-het	16	77353874	77353874	C	T	het	c.G2404A	p.G802R
'ADAMTS18'	Compound-het-het	16	77353874	77353874	C	T	het	c.G2404A	p.G802R
'ADAMTS18'	Recessive	16	77401515	77401515	C	T	hom	c.G601A	p.V201I
'ADAMTS18'	Compound-het-het	16	77328958	77328958	G	C	het	c.C2868G	p.I956M
'ADAMTS2'	Compound-het-het	5	178951506	178951506	A	G	het	c.A28G	p.I10V
'ADAMTS2'	Compound-het-het	5	178951717	178951717	A	G	het	c.A239G	p.H80R
'ADAMTS2'	Compound-het-het	5	178951618	178951618	C	T	het	c.C140T	p.P47L
'ADAMTS2'	Compound-het-het	5	178951831	178951831	G	A	het	c.G353A	p.R118H
'ADAMTS2'	Compound-het-het	5	178772260	178772262	GCA	-	het	c.68_70del	p.L23del
'ADAMTS2'	Compound-het-het	5	178951618	178951618	C	T	het	c.C140T	p.P47L
'ADAMTS2'	Compound-het-het	5	178951831	178951831	G	A	het	c.G353A	p.R118H
'ADAMTS20'	Compound-het-het	12	43750375	43750375	T	C	het	c.A5555G	p.N1852S
'ADAMTS20'	Compound-het-het	12	43826192	43826192	T	C	het	c.A473G:c.A509G:c.A3011G	p.N158S:p.N170S:p.N1004S
'ADAMTS7'	Compound-het-het	15	79103481	79103481	C	T	het	c.G82A	p.A28T
'ADAMTS7'	Compound-het-het	15	79103481	79103481	C	T	het	c.G82A	p.A28T
'ADAMTS7'	Compound-het-het	15	79059182	79059182	T	C	het	c.A3071G	p.H1024R
'ADAMTS7'	Compound-het-het	15	79059183	79059183	G	A	het	c.C3070T	p.H1024Y
'ADAMTS7'	Compound-het-het	15	79067065	79067065	G	A	het	c.C1777T	p.P593S
'ADAMTS7'	Compound-het-het	15	79056326	79056326	G	A	het	c.C4535T	p.A1512V
'ADAMTS7'	Compound-het-het	15	79058051	79058051	G	A	het	c.C4202T	p.A1401V
'ADAMTS7'	Compound-het-het	15	79058310	79058310	G	A	het	c.C3943T	p.P1315S
'ADAMTS7'	Compound-het-het	15	79058528	79058528	G	A	het	c.C3725T	p.P1242L
'ADAMTS7'	Compound-het-het	15	79060568	79060568	C	T	het	c.G2552A	p.R851Q
'ADAMTS7'	Compound-het-het	15	79063901	79063901	C	A	het	c.G2402T	p.G801V
'ADAMTS7'	Compound-het-het	15	79058040	79058040	C	T	het	c.G4213A	p.A1405T
'ADAMTS7'	Compound-het-het	15	79058687	79058687	G	T	het	c.C3566A	p.T1189N
'ADAMTS7'	Compound-het-het	15	79058987	79058987	G	A	het	c.C3266T	p.A1089V
'ADAMTS7'	Compound-het-het	15	79059257	79059257	C	T	het	c.G2996A	p.G999D
'ADAMTS7'	Compound-het-het	15	79080626	79080626	G	A	het	c.C1269T	p.A423A
'ADAMTS7'	Compound-het-het	15	79082154	79082154	C	T	het	c.G1055A	p.R352Q
'ADAMTS7'	Compound-het-het	15	79083038	79083038	G	C	het	c.C1002G	p.H334Q
'ADAMTS8'	Recessive	11	130298118	130298118	-	GCAGCAGCAGCA	hom	c.63_64insTGCTGCTGCTGC	p.L21_P22insCCCC
'ADAMTSL1'	Compound-het-het	9	18681930	18681930	G	A	het	c.G1462A	p.V488I
'ADAMTSL1'	Compound-het-het	9	18906747	18906747	C	T	het	c.C733T	p.P245S
'ADAMTSL4'	Compound-het-het	1	150530531	150530531	C	T	het	c.C2288T:c.C2357T	p.P763L:p.P786L
'ADARB1'	Compound-het-het	21	46534734	46534734	T	C	het	c.A140G	p.Q47R
'ADARB1'	Compound-het-het	21	46572599	46572599	C	T	het	c.C76T	p.R26C
'ADARB1'	Compound-het-het	21	46512093	46512093	C	T	het	c.G194A	p.R65Q
'ADARB2'	Compound-het-het	10	1246277	1246277	A	T	het	c.T20A	p.V7D
'ADARB2'	Compound-het-het	10	1279782	1279782	C	T	het	c.G1367A	p.R456Q
'ADARB2'	Compound-het-het	10	1230959	1230959	G	A	het	c.C412T:c.C91T:c.C1885T	p.R138C:p.R31C:p.R629C
'ADARB2'	Compound-het-het	10	1405594	1405594	G	A	het	c.C706T	p.L236F
'ADCY2'	Compound-het-het	5	7520929	7520929	G	A	het	c.G487A	p.V163I
'ADGB'	Compound-het-het	6	146985422	146985422	T	A	het	c.T134A:c.T698A	p.F45Y:p.F233Y
'ADGB'	Compound-het-het	6	147022205	147022205	A	G	het	c.A1706G	p.Q569R
'ADGRA1-AS1'	Recessive	10	134886550	134886550	C	T	hom	c.C584T	p.P195L
'ADGRA1-AS1'	Compound-het-het	10	134885481	134885481	G	-	het	c.240delG	p.G81Afs*79
'ADGRA1-AS1'	Compound-het-het	10	134893822	134893822	T	A	het	c.T767A	p.M256K
'ADGRA3'	Compound-het-het	4	22517302	22517310	CGCCGCCGC	-	het	c.98_106del	p.G33_G35del
'ADGRA3'	Compound-het-het	4	22517388	22517388	C	T	het	c.G20A	p.R7Q
'ADGRE1'	Compound-het-het	19	6937642	6937642	C	A	het	c.C2215A:c.C2107A:c.C2443A:c.C2581A:c.C2638A	p.P739T:p.P703T:p.P815T:p.P861T:p.P880T
'ADGRE1'	Compound-het-het	19	6937658	6937658	C	T	het	c.C2231T:c.C2123T:c.C2459T:c.C2597T:c.C2654T	p.T744M:p.T708M:p.T820M:p.T866M:p.T885M
'ADGRE1'	Compound-het-het	19	6903957	6903957	T	G	het	c.T375G:c.T696G:c.T642G:c.T798G	p.C125W:p.C232W:p.C214W:p.C266W
'ADGRE1'	Compound-het-het	19	6937658	6937658	C	T	het	c.C2231T:c.C2123T:c.C2459T:c.C2597T:c.C2654T	p.T744M:p.T708M:p.T820M:p.T866M:p.T885M
'ADGRE1'	Compound-het-het	19	6924758	6924758	A	G	het	c.A1438G:c.A1330G:c.A1705G:c.A1861G	p.I480V:p.I444V:p.I569V:p.I621V
'ADGRE1'	Compound-het-het	19	6937642	6937642	C	A	het	c.C2215A:c.C2107A:c.C2443A:c.C2581A:c.C2638A	p.P739T:p.P703T:p.P815T:p.P861T:p.P880T
'ADGRE5'	Compound-het-het	19	14513562	14513562	A	G	het	c.A1058G:c.A1190G:c.A1337G	p.N353S:p.N397S:p.N446S
'ADGRE5'	Compound-het-het	19	14516704	14516704	G	C	het	c.G1495C:c.G1627C:c.G1774C	p.V499L:p.V543L:p.V592L
'ADGRF5'	Compound-het-het	6	46822500	46822500	-	G	het	c.2266dupC	p.G757Rfs*3
'ADGRF5'	Compound-het-het	6	46874418	46874418	C	T	het	c.G82A	p.E28K
'ADGRF5'	Compound-het-het	6	46822500	46822500	-	G	het	c.2266dupC	p.G757Rfs*3
'ADGRF5'	Compound-het-het	6	46874418	46874418	C	T	het	c.G82A	p.E28K
'ADGRG4'	Recessive	X	135453648	135453648	G	A	hom	c.G6952A:c.G6943A:c.G7558A	p.V2318I:p.V2315I:p.V2520I
'ADGRL1'	Compound-het-het	19	14273780	14273780	G	C	het	c.C833G:c.C848G	p.T278S:p.T283S
'ADGRL1'	Compound-het-het	19	14301998	14301998	G	A	het	c.C317T	p.P106L
'ADGRL3'	Compound-het-het	4	62897242	62897242	A	G	het	c.A3274G:c.A3301G:c.A3478G:c.A3505G	p.T1092A:p.T1101A:p.T1160A:p.T1169A
'ADGRL3'	Compound-het-het	4	62936601	62936601	C	T	het	c.C4562T:c.C4487T:c.C4385T:c.C4691T:c.C4514T:c.C4718T	p.P1521L:p.P1496L:p.P1462L:p.P1564L:p.P1505L:p.P1573L
'ADGRV1'	Compound-het-het	5	90074821	90074821	G	A	het	c.G12989A	p.R4330K
'ADGRV1'	Compound-het-het	5	90368368	90368368	A	C	het	c.A5240C:c.A18257C	p.K1747T:p.K6086T
'ADGRV1'	Compound-het-het	5	90074821	90074821	G	A	het	c.G12989A	p.R4330K
'ADGRV1'	Compound-het-het	5	90368368	90368368	A	C	het	c.A5240C:c.A18257C	p.K1747T:p.K6086T
'ADGRV1'	Compound-het-het	5	90001226	90001226	C	T	het	c.C8396T	p.P2799L
'ADGRV1'	Compound-het-het	5	90001231	90001231	G	A	het	c.G8401A	p.G2801R
'ADGRV1'	Compound-het-het	5	90059270	90059270	C	A	het	c.C12269A	p.T4090N
'ADGRV1'	Compound-het-het	5	90144542	90144542	G	A	het	c.G4091A:c.G17108A	p.R1364H:p.R5703H
'ADGRV1'	Compound-het-het	5	90001231	90001231	G	A	het	c.G8401A	p.G2801R
'ADGRV1'	Compound-het-het	5	90059270	90059270	C	A	het	c.C12269A	p.T4090N
'ADGRV1'	Compound-het-het	5	90144542	90144542	G	A	het	c.G4091A:c.G17108A	p.R1364H:p.R5703H
'ADPRHL1'	Compound-het-het	13	114059240	114059240	G	A	het	c.C3265T	p.R1089W
'ADPRHL1'	Compound-het-het	13	114062002	114062002	T	C	het	c.A503G	p.K168R
'ADPRHL1'	Compound-het-het	13	114058352	114058387	GAGCCCGTTCCTGAGCCCCTTTCTGGGCCTGTTCCC	-	het	c.4118_4153del	p.R1373_A1384del
'ADPRHL1'	Compound-het-het	13	114059240	114059240	G	A	het	c.C3265T	p.R1089W
'ADPRHL1'	Compound-het-het	13	114062002	114062002	T	C	het	c.A503G	p.K168R
'ADPRHL1'	Compound-het-het	13	114058444	114058444	T	A	het	c.A4061T	p.K1354I
'ADPRHL1'	Compound-het-het	13	114058446	114058446	C	G	het	c.G4059C	p.Q1353H
'ADPRHL1'	Compound-het-het	13	114058451	114058451	C	T	het	c.G4054A	p.A1352T
'ADPRHL1'	Compound-het-het	13	114058460	114058460	G	A	het	c.C4045T	p.R1349W
'ADPRHL1'	Compound-het-het	13	114058462	114058462	G	C	het	c.C4043G	p.A1348G
'ADPRHL1'	Compound-het-het	13	114059240	114059240	G	A	het	c.C3265T	p.R1089W
'ADPRHL1'	Compound-het-het	13	114062002	114062002	T	C	het	c.A503G	p.K168R
'ADPRHL1'	Compound-het-het	13	114058393	114058393	C	T	het	c.G4112A	p.R1371Q
'ADPRHL1'	Compound-het-het	13	114058429	114058429	C	T	het	c.G4076A	p.R1359Q
'ADPRHL1'	Compound-het-het	13	114059240	114059240	G	A	het	c.C3265T	p.R1089W
'ADPRHL1'	Compound-het-het	13	114059638	114059638	G	A	het	c.C2867T	p.A956V
'ADPRHL1'	Compound-het-het	13	114062002	114062002	T	C	het	c.A503G	p.K168R
'ADPRHL1'	Compound-het-het	13	114059240	114059240	G	A	het	c.C3265T	p.R1089W
'ADPRHL1'	Compound-het-het	13	114059638	114059638	G	A	het	c.C2867T	p.A956V
'ADPRHL1'	Compound-het-het	13	114062002	114062002	T	C	het	c.A503G	p.K168R
'ADPRHL1'	Compound-het-het	13	114059240	114059240	G	A	het	c.C3265T	p.R1089W
'ADPRHL1'	Compound-het-het	13	114059638	114059638	G	A	het	c.C2867T	p.A956V
'ADPRHL1'	Compound-het-het	13	114062002	114062002	T	C	het	c.A503G	p.K168R
'ADPRHL1'	Compound-het-het	13	114058444	114058444	T	A	het	c.A4061T	p.K1354I
'ADPRHL1'	Compound-het-het	13	114058446	114058446	C	G	het	c.G4059C	p.Q1353H
'ADPRHL1'	Compound-het-het	13	114060598	114060598	T	G	het	c.A1907C	p.K636T
'ADPRHL1'	Compound-het-het	13	114077172	114077172	C	T	het	c.G784A:c.G1030A	p.A262T:p.A344T
'ADPRHL1'	Compound-het-het	13	114058093	114058093	C	A	het	c.G4412T	p.S1471I
'ADPRHL1'	Compound-het-het	13	114062009	114062009	G	A	het	c.C496T	p.R166W
'ADPRHL1'	Compound-het-het	13	114058360	114058467	TCCTGAGCCCCTTTCTGGGCCTGTTCCCGAGCCCGTTCCTGAGCCCCTTTCTGGGCCTGTTCCCGAGCCCGTTCCTGAGCCCCTTTCTGGGCCTGTTCCCGAGCCCGC	-	het	c.4038_4145del	p.R1349_A1384del
'ADPRHL1'	Compound-het-het	13	114077172	114077172	C	T	het	c.G784A:c.G1030A	p.A262T:p.A344T
'ADRB1'	Compound-het-het	10	115803905	115803905	T	C	het	c.T14C	p.V5A
'ADRB3'	Compound-het-het	8	37822975	37822975	T	C	het	c.A1013G	p.N338S
'ADRB3'	Compound-het-het	8	37823536	37823536	T	C	het	c.A452G	p.K151R
'AF072097'	Compound-het-het	16	29394633	29394758	TGTCTTGATATTATCATCTGCTGAGGGTGGAGCTGAGGGTGGAAGGGGAGTGAGCTGACGCTCAGAAGGTGTCTTGAGATTATCATCCGCTGAGGGTGGAAGCGGCCCCCGCAGATGCTCGGCAGG	-	het	c.1495_1620del	p.P499_T540del
'AF072097'	Compound-het-het	16	29394657	29394661	GGGTG	-	het	c.1592_1596del	p.P531Lfs*4
'AF072097'	Compound-het-het	16	29394664	29394784	GCTGAGGGTGGAAGGGGAGTGAGCTGACGCTCAGAAGGTGTCTTGAGATTATCATCCGCTGAGGGTGGAAGCGGCCCCCGCAGATGCTCGGCAGGTGTCTTGATATTATCATCTGCTGAGG	-	het	c.1469_1589del	p.P490Lfs*67
'AF072097'	Compound-het-het	16	29394950	29395074	AAGGTGTCTTGAGATTATCATCCGCTGAGGGTGGAAGCGGCCCCCGCAGATGCTCGGCAGGTGTCTTGATATTATCATCTGCTGAGGGTGGAGCTGAGGGTGGAAGGGGAGTGAGCTGACGCTCA	-	het	c.1179_1303del	p.E394*
'AF086476'	Recessive	17	29349020	29349020	A	G	hom	c.A145G	p.I49V
'AF086476'	Recessive	17	29349020	29349020	A	G	hom	c.A145G	p.I49V
'AFF1'	Compound-het-het	4	88026783	88026800	GCTCGAAGACGACCTTCA	-	het	c.180_197del:c.339_356del:c.1266_1283del:c.1200_1217del:c.1287_1304del	p.E62_L67del:p.E115_L120del:p.E424_L429del:p.E402_L407del:p.E431_L436del
'AFF1'	Compound-het-het	4	88047328	88047328	C	T	het	c.C1544T:c.C2630T:c.C2651T	p.P515L:p.P877L:p.P884L
'AGAP1'	Compound-het-het	2	236626225	236626225	G	A	het	c.G247A:c.G88A:c.G1042A	p.G83S:p.G30S:p.G348S
'AGAP1'	Compound-het-het	2	236877246	236877246	G	A	het	c.G1141A:c.G1465A:c.G2260A:c.G1624A	p.G381S:p.G489S:p.G754S:p.G542S
'AGAP11'	Compound-het-het	10	88768582	88768582	C	G	het	c.C573G	p.C191W
'AGAP11'	Compound-het-het	10	88769066	88769066	T	G	het	c.T1057G	p.W353G
'AGAP12P'	Compound-het-het	10	49218421	49218421	C	T	het	c.G1718A	p.R573H
'AGAP12P'	Compound-het-het	10	49219520	49219520	G	A	het	c.C619T	p.R207W
'AGAP4'	Compound-het-het	10	46322145	46322145	T	C	het	c.A1210G	p.T404A
'AGAP4'	Compound-het-het	10	46322682	46322682	T	C	het	c.A673G	p.M225V
'AGAP4'	Recessive	10	46322037	46322037	T	C	hom	c.A1318G	p.K440E
'AGAP5'	Compound-het-het	10	75435544	75435544	G	A	het	c.C805T:c.C874T	p.R269X:p.R292X
'AGAP7'	Recessive	10	51486149	51486149	T	A	hom	c.A53T	p.D18V
'AGAP7P'	Recessive	10	51486149	51486149	T	A	hom	c.A53T	p.D18V
'AGAP8'	Compound-het-het	10	48901800	48901800	G	A	het	c.C1073T	p.T358M
'AGAP8'	Compound-het-het	10	51225072	51225072	G	A	het	c.C1910T:c.C1862T	p.A637V:p.A621V
'AGAP8'	Compound-het-het	10	51225892	51225892	G	C	het	c.C1090G:c.C1042G	p.P364A:p.P348A
'AGAP8'	Compound-het-het	10	51225894	51225894	C	A	het	c.G1088T:c.G1040T	p.S363I:p.S347I
'AGAP8'	Compound-het-het	10	51226199	51226199	A	C	het	c.T783G:c.T735G	p.I261M:p.I245M
'AGAP8'	Recessive	10	51226199	51226199	A	C	hom	c.T783G:c.T735G	p.I261M:p.I245M
'AGAP8'	Compound-het-het	10	48901800	48901800	G	A	het	c.C1073T	p.T358M
'AGAP8'	Compound-het-het	10	51225072	51225072	G	A	het	c.C1910T:c.C1862T	p.A637V:p.A621V
'AGAP8'	Compound-het-het	10	51225892	51225892	G	C	het	c.C1090G:c.C1042G	p.P364A:p.P348A
'AGAP8'	Compound-het-het	10	51225894	51225894	C	A	het	c.G1088T:c.G1040T	p.S363I:p.S347I
'AGBL1'	Compound-het-het	15	86687050	86687050	G	A	het	c.G98A	p.R33Q
'AGBL1'	Compound-het-het	15	86790997	86790997	G	A	het	c.G484A	p.V162M
'AGBL1'	Recessive	15	86791080	86791080	G	C	hom	c.G567C	p.Q189H
'AGBL3'	Recessive	7	134719373	134719373	C	A	hom	c.C1031A:c.C953A	p.T344N:p.T318N
'AGBL3'	Recessive	7	134719421	134719421	C	T	hom	c.C1079T:c.C1001T	p.T360I:p.T334I
'AGFG2'	Compound-het-het	7	100159986	100159986	G	C	het	c.G982C	p.A328P
'AGR2'	Recessive	7	16829206	16829206	G	A	hom	c.G341A	p.R114Q
'AGR2'	Recessive	7	16829210	16829210	T	-	hom	c.345delT	p.G116Vfs*11
'AGR2'	Recessive	7	16829134	16829134	T	C	hom	c.T269C	p.L90P
'AGR2'	Recessive	7	16829092	16829092	A	G	hom	c.A227G	p.Q76R
'AGR2'	Recessive	7	16829134	16829134	T	C	hom	c.T269C	p.L90P
'AGRN'	Compound-het-het	1	970687	970687	C	T	het	c.C494T	p.P165L
'AGRN'	Compound-het-het	1	983566	983566	G	A	het	c.G3926A	p.R1309Q
'AGRN'	Compound-het-het	1	970687	970687	C	T	het	c.C494T	p.P165L
'AGRN'	Compound-het-het	1	983566	983566	G	A	het	c.G3926A	p.R1309Q
'AGRN'	Compound-het-het	1	983604	983604	C	T	het	c.C3964T	p.R1322W
'AGRN'	Compound-het-het	1	983604	983604	C	T	het	c.C3964T	p.R1322W
'AGRN'	Compound-het-het	1	979400	979400	C	G	het	c.C1996G	p.Q666E
'AGRN'	Compound-het-het	1	979747	979747	G	A	het	c.G2182A	p.E728K
'AGRN'	Compound-het-het	1	982213	982213	G	C	het	c.G3264C	p.L1088F
'AGRN'	Compound-het-het	1	979400	979400	C	G	het	c.C1996G	p.Q666E
'AGRN'	Compound-het-het	1	979747	979747	G	A	het	c.G2182A	p.E728K
'AGRN'	Compound-het-het	1	982213	982213	G	C	het	c.G3264C	p.L1088F
'AGRN'	Compound-het-het	1	978628	978628	C	T	het	c.C1394T	p.P465L
'AGRN'	Compound-het-het	1	982213	982213	G	C	het	c.G3264C	p.L1088F
'AGRN'	Compound-het-het	1	982213	982213	G	C	het	c.G3264C	p.L1088F
'AGRN'	Compound-het-het	1	983506	983506	C	T	het	c.C3866T	p.P1289L
'AGTR2'	Recessive	X	115304255	115304255	C	T	hom	c.C722T	p.T241M
'AHCTF1'	Compound-het-het	1	247013576	247013576	A	G	het	c.T5759C:c.T5837C:c.T5732C	p.L1920S:p.L1946S:p.L1911S
'AHCTF1'	Compound-het-het	1	247067327	247067327	T	C	het	c.A917G:c.A995G:c.A890G	p.D306G:p.D332G:p.D297G
'AHNAK'	Compound-het-het	11	62287454	62287454	G	A	het	c.C14435T	p.S4812L
'AHNAK'	Compound-het-het	11	62299422	62299422	C	T	het	c.G2467A	p.V823M
'AHNAK'	Compound-het-het	11	62285541	62285541	G	A	het	c.C16348T	p.P5450S
'AHNAK'	Compound-het-het	11	62300133	62300133	C	T	het	c.G1756A	p.G586S
'AHNAK'	Compound-het-het	11	62286044	62286044	C	A	het	c.G15845T	p.G5282V
'AHNAK'	Compound-het-het	11	62290170	62290170	A	C	het	c.T11719G	p.L3907V
'AHNAK'	Compound-het-het	11	62286044	62286044	C	A	het	c.G15845T	p.G5282V
'AHNAK'	Compound-het-het	11	62290170	62290170	A	C	het	c.T11719G	p.L3907V
'AHNAK'	Compound-het-het	11	62286247	62286247	G	T	het	c.C15642A	p.S5214R
'AHNAK'	Compound-het-het	11	62296335	62296335	C	T	het	c.G5554A	p.A1852T
'AHNAK2'	Compound-het-het	14	105405187	105405187	A	G	het	c.T1595C:c.T16601C	p.V532A:p.V5534A
'AHNAK2'	Compound-het-het	14	105418381	105418381	G	A	het	c.C3407T	p.P1136L
'AHNAK2'	Compound-het-het	14	105420534	105420534	C	A	het	c.G1254T	p.R418S
'AHNAK2'	Compound-het-het	14	105409332	105409332	C	G	het	c.G12456C	p.M4152I
'AHNAK2'	Compound-het-het	14	105416723	105416723	C	T	het	c.G5065A	p.E1689K
'AHNAK2'	Compound-het-het	14	105416725	105416725	A	G	het	c.T5063C	p.V1688A
'AHNAK2'	Recessive	14	105416412	105416412	G	T	hom	c.C5376A	p.D1792E
'AHNAK2'	Compound-het-het	14	105412308	105412308	C	A	het	c.G9480T	p.K3160N
'AHNAK2'	Compound-het-het	14	105415793	105415793	C	T	het	c.G5995A	p.G1999R
'AHNAK2'	Compound-het-het	14	105415795	105415795	A	T	het	c.T5993A	p.F1998Y
'AHNAK2'	Compound-het-het	14	105408871	105408871	G	A	het	c.C12917T	p.P4306L
'AHNAK2'	Compound-het-het	14	105416313	105416313	C	A	het	c.G5475T	p.M1825I
'AHNAK2'	Compound-het-het	14	105408871	105408871	G	A	het	c.C12917T	p.P4306L
'AHNAK2'	Compound-het-het	14	105416313	105416313	C	A	het	c.G5475T	p.M1825I
'AHNAK2'	Compound-het-het	14	105413036	105413036	C	T	het	c.G8752A	p.V2918I
'AHNAK2'	Compound-het-het	14	105413056	105413056	A	T	het	c.T8732A	p.L2911H
'AHNAK2'	Compound-het-het	14	105409355	105409355	C	T	het	c.G12433A	p.V4145M
'AHNAK2'	Compound-het-het	14	105419728	105419728	G	A	het	c.C2060T	p.A687V
'AHNAK2'	Compound-het-het	14	105419737	105419737	A	G	het	c.T2051C	p.L684S
'AHNAK2'	Compound-het-het	14	105409355	105409355	C	T	het	c.G12433A	p.V4145M
'AHNAK2'	Compound-het-het	14	105419728	105419728	G	A	het	c.C2060T	p.A687V
'AHNAK2'	Compound-het-het	14	105419737	105419737	A	G	het	c.T2051C	p.L684S
'AHNAK2'	Compound-het-het	14	105411345	105411359	GGGCATCTTGAACTT	-	het	c.10429_10443del	p.K3477_P3481del
'AHNAK2'	Compound-het-het	14	105418293	105418293	C	A	het	c.G3495T	p.M1165I
'AHNAK2'	Compound-het-het	14	105408829	105408829	G	A	het	c.C12959T	p.S4320L
'AHNAK2'	Compound-het-het	14	105409999	105409999	G	T	het	c.C11789A	p.S3930Y
'AHNAK2'	Compound-het-het	14	105416254	105416254	G	A	het	c.C5534T	p.S1845L
'AHNAK2'	Compound-het-het	14	105408829	105408829	G	A	het	c.C12959T	p.S4320L
'AHNAK2'	Compound-het-het	14	105409999	105409999	G	T	het	c.C11789A	p.S3930Y
'AHNAK2'	Compound-het-het	14	105418358	105418358	G	A	het	c.C3430T	p.R1144W
'AHNAK2'	Compound-het-het	14	105418798	105418798	T	C	het	c.A2990G	p.K997R
'AHNAK2'	Recessive	14	105416996	105416996	C	T	hom	c.G4792A	p.V1598I
'AHNAK2'	Recessive	14	105417002	105417002	-	TT	hom	c.4785_4786insAA	p.I1596Kfs*2
'AHNAK2'	Recessive	14	105417004	105417004	T	A	hom	c.A4784T	p.Q1595L
'AHNAK2'	Recessive	14	105417008	105417009	GC	-	hom	c.4779_4780del	p.Q1595Dfs*4
'AHNAK2'	Compound-het-het	14	105418381	105418381	G	A	het	c.C3407T	p.P1136L
'AHNAK2'	Compound-het-het	14	105420534	105420534	C	A	het	c.G1254T	p.R418S
'AHNAK2'	Compound-het-het	14	105418381	105418381	G	A	het	c.C3407T	p.P1136L
'AHNAK2'	Compound-het-het	14	105420534	105420534	C	A	het	c.G1254T	p.R418S
'AHNAK2'	Recessive	14	105416713	105416713	A	C	hom	c.T5075G	p.V1692G
'AHNAK2'	Compound-het-het	14	105408334	105408334	G	A	het	c.C13454T	p.S4485L
'AHNAK2'	Compound-het-het	14	105408462	105408462	A	C	het	c.T13326G	p.S4442R
'AHNAK2'	Compound-het-het	14	105409157	105409157	C	T	het	c.G12631A	p.G4211S
'AHNAK2'	Compound-het-het	14	105409166	105409166	T	C	het	c.A12622G	p.K4208E
'AHNAK2'	Compound-het-het	14	105409172	105409172	G	C	het	c.C12616G	p.L4206V
'AHNAK2'	Compound-het-het	14	105411667	105411667	A	C	het	c.T10121G	p.V3374G
'AHNAK2'	Compound-het-het	14	105412066	105412066	C	A	het	c.G9722T	p.R3241L
'AHNAK2'	Compound-het-het	14	105418918	105418918	C	A	het	c.G2870T	p.G957V
'AHNAK2'	Compound-het-het	14	105411407	105411407	G	C	het	c.C10381G	p.L3461V
'AHNAK2'	Compound-het-het	14	105418267	105418267	C	A	het	c.G3521T	p.G1174V
'AICDA'	Compound-het-het	12	8757939	8757939	C	G	het	c.G299C	p.G100A
'AIFM2'	Compound-het-het	10	71876390	71876390	G	A	het	c.C757T	p.R253C
'AIFM2'	Compound-het-het	10	71880301	71880301	T	C	het	c.A469G	p.M157V
'AIM1'	Compound-het-het	6	106967146	106967146	G	A	het	c.G839A	p.R280Q
'AIM1'	Compound-het-het	6	106973164	106973164	G	A	het	c.G3091A	p.D1031N
'AIM1'	Compound-het-het	6	106967554	106967554	A	G	het	c.A1247G	p.K416R
'AIM1'	Compound-het-het	6	106991410	106991410	G	C	het	c.G210C:c.G3753C	p.E70D:p.E1251D
'AIM1L'	Compound-het-het	1	26670948	26670948	G	A	het	c.C236T	p.T79M
'AIM1L'	Compound-het-het	1	26673075	26673075	C	T	het	c.G74A	p.R25Q
'AIRE'	Compound-het-het	21	45710893	45710893	G	T	het	c.G204T	p.W68C
'AIRE'	Compound-het-het	21	45710960	45710960	G	A	het	c.G484A:c.G271A	p.V162I:p.V91I
'AJ271736.10'	Compound-het-het	X	155251371	155251371	C	G	het	c.C214G	p.R72G
'AJ271736.10'	Compound-het-het	X	155251725	155251725	C	T	het	c.C362T	p.T121M
'AJ271736.10'	Compound-het-het	X	155254995	155254995	C	T	het	c.C751T	uc022cip.1:p.Q251X
'AJ271736.10'	Compound-het-het	X	155254995	155254995	C	T	het	c.C751T	uc022cip.1:p.Q251X
'AK074396'	Compound-het-het	9	133302976	133302976	G	A	het	c.G1165A	p.A389T
'AK074396'	Compound-het-het	9	133302976	133302976	G	A	het	c.G1165A	p.A389T
'AK094599'	Recessive	2	133077786	133077786	A	G	hom	c.A188G	p.H63R
'AK094599'	Compound-het-het	2	133075441	133075441	A	C	het	c.A902C	p.D301A
'AK094599'	Compound-het-het	2	133075966	133075966	T	C	het	c.T1427C	p.F476S
'AK094599'	Compound-het-het	2	133075966	133075966	T	C	het	c.T1427C	p.F476S
'AK094599'	Compound-het-het	2	133077786	133077786	A	G	het	c.A188G	p.H63R
'AK094599'	Compound-het-het	2	133077786	133077786	A	G	het	c.A188G	p.H63R
'AK094599'	Compound-het-het	2	133077800	133077800	A	C	het	c.A202C	p.K68Q
'AK094599'	Compound-het-het	2	133075694	133075694	C	A	het	c.C1155A	p.N385K
'AK094599'	Compound-het-het	2	133075931	133075931	G	C	het	c.G1392C	p.L464F
'AK094599'	Compound-het-het	2	133070533	133070533	T	C	het	c.T107C	p.V36A
'AK094599'	Recessive	2	133077786	133077786	A	G	hom	c.A188G	p.H63R
'AK094599'	Compound-het-het	2	133074745	133074745	A	C	het	c.A206C	p.E69A
'AK094599'	Compound-het-het	2	133075154	133075154	C	A	het	c.C615A	p.H205Q
'AK094599'	Recessive	2	133077786	133077786	A	G	hom	c.A188G	p.H63R
'AK094599'	Recessive	2	133077786	133077786	A	G	hom	c.A188G	p.H63R
'AK094599'	Recessive	2	133077786	133077786	A	G	hom	c.A188G	p.H63R
'AK096982'	Recessive	16	29442649	29442649	T	C	hom	c.A1060G	p.S354G
'AK096982'	Recessive	16	29442786	29442786	G	C	hom	c.C923G	p.T308S
'AK125701'	Recessive	16	70381130	70381130	T	C	hom	c.T236C	p.L79S
'AK125821'	Compound-het-het	11	76093419	76093419	C	T	het	c.C547T	p.H183Y
'AK126180'	Compound-het-het	2	242616715	242616715	A	G	het	c.T524C	p.L175P
'AK126180'	Compound-het-het	2	242617160	242617160	A	G	het	c.T79C	p.S27P
'AK126213'	Compound-het-het	5	38821312	38821312	T	G	het	c.A227C	p.H76P
'AK126213'	Compound-het-het	5	38821346	38821346	T	G	het	c.A193C	p.I65L
'AK126213'	Compound-het-het	5	38821359	38821360	AT	-	het	c.179_180del	p.Y60Ffs*164
'AK126213'	Compound-het-het	5	38821366	38821366	T	C	het	c.A173G	p.Y58C
'AK126213'	Compound-het-het	5	38821194	38821202	CACATATAT	-	het	c.337_345del	p.I113_V115del
'AK126213'	Compound-het-het	5	38821204	38821260	TATGCATGTGTACATATGAATACACATATATGTATGCATATGCGTGTATATGAATAT	-	het	c.279_335del	p.Y94_Y112del
'AK126213'	Compound-het-het	5	38821294	38821294	T	G	het	c.A245C	p.Y82S
'AK126539'	Compound-het-het	16	11484147	11484147	C	A	het	c.G1144T	p.A382S
'AK126539'	Compound-het-het	16	11518010	11518010	C	A	het	c.G5994T	p.K1998N
'AK126539'	Compound-het-het	16	11554829	11554829	T	C	het	c.A337G:c.A3457G	p.S113G:p.S1153G
'AK126539'	Compound-het-het	16	11570760	11570760	G	C	het	c.C2487G	p.I829M
'AK126539'	Compound-het-het	16	11608353	11608353	C	T	het	c.G592A	p.A198T
'AK126539'	Compound-het-het	16	11480994	11480994	C	T	het	c.G1412A	p.R471H
'AK126539'	Compound-het-het	16	11480994	11480994	C	T	het	c.G1412A	p.R471H
'AK126539'	Compound-het-het	16	11484207	11484207	C	T	het	c.G1084A	p.G362R
'AK126539'	Compound-het-het	16	11525033	11525033	G	C	het	c.C5353G	p.L1785V
'AK126539'	Compound-het-het	16	11594668	11594668	T	C	het	c.A1132G	p.M378V
'AK126539'	Compound-het-het	16	11594745	11594745	G	A	het	c.C1055T	p.A352V
'AK126539'	Compound-het-het	16	11609831	11609831	C	T	het	c.G503A	p.R168H
'AK126539'	Compound-het-het	16	11555991	11555991	C	A	het	c.G172T:c.G3292T	p.D58Y:p.D1098Y
'AK126539'	Compound-het-het	16	11563436	11563436	T	G	het	c.A2971C	p.M991L
'AK126539'	Compound-het-het	16	11585598	11585598	G	A	het	c.C14T:c.C1583T	p.A5V:p.A528V
'AK126539'	Compound-het-het	16	11486314	11486314	G	A	het	c.C541T	p.R181W
'AK126539'	Compound-het-het	16	11608353	11608353	C	T	het	c.G592A	p.A198T
'AK128833'	Compound-het-het	1	1111576	1111576	G	A	het	c.C295T	p.R99W
'AK128833'	Compound-het-het	1	1111650	1111650	C	T	het	c.G221A	p.R74H
'AK301968'	Compound-het-het	15	85788036	85788161	GTGAACAGGAGGAGAGGCTACATGAACAGGAGGAGAGGCTGTGTGAACAGGAGGAGAGGCTACGTGAACAGGAGGAGAGGCTGTGTGAACAGGAGGAGAGGCTACGTGAACAGGAGGAGAGGCTGT	-	het	c.815_940del	p.H279_L320del
'AK301968'	Compound-het-het	15	85788504	85788504	-	GGAGCTGGAGAGGCTGCAGGAGCTGGAGAGGCTGCG	het	c.1197_1198insGGAGCTGGAGAGGCTGCAGGAGCTGGAGAGGCTGCG	p.Q399_E400insGAGEAAGAGEAA
'AK301968'	Compound-het-het	15	85788014	85788014	T	C	het	c.T793C	p.C265R
'AK301968'	Compound-het-het	15	85788504	85788504	-	GGAGCTGGAGAGGCTGCAGGAGCTGGAGAGGCTGCG	het	c.1197_1198insGGAGCTGGAGAGGCTGCAGGAGCTGGAGAGGCTGCG	p.Q399_E400insGAGEAAGAGEAA
'AK301968'	Compound-het-het	15	85790273	85790275	CCC	-	het	c.1465_1467del	p.P489del
'AK302092'	Compound-het-het	15	82932494	82932494	C	T	het	c.G1571A	p.R524Q
'AK302092'	Compound-het-het	15	82932494	82932494	C	T	het	c.G1571A	p.R524Q
'AK302092'	Compound-het-het	15	82934431	82934431	C	A	het	c.G1149T	p.E383D
'AK302545'	Recessive	22	20640814	20640814	A	T	hom	c.T563A	p.V188D
'AK304826'	Compound-het-het	16	18441476	18441476	G	A	het	c.C769T	p.R257C
'AK304826'	Compound-het-het	16	18441662	18441662	G	A	het	c.C583T	p.R195W
'AK310228'	Compound-het-het	16	16465369	16465369	A	G	het	c.A86G	p.N29S
'AK310228'	Compound-het-het	16	18433350	18433350	G	A	het	c.C517T	p.R173W
'AK310228'	Compound-het-het	16	18433350	18433350	G	A	het	c.C517T	p.R173W
'AK310228'	Compound-het-het	16	16468328	16468328	C	T	het	c.C959T	p.P320L
'AK310228'	Recessive	16	16466364	16466364	A	G	hom	c.A610G	p.M204V
'AKAP1'	Compound-het-het	17	55182923	55182923	T	G	het	c.T98G	p.V33G
'AKAP11'	Compound-het-het	13	42874225	42874225	G	C	het	c.G1343C	p.S448T
'AKAP11'	Compound-het-het	13	42887253	42887253	C	G	het	c.C5344G	p.P1782A
'AKAP11'	Compound-het-het	13	42874225	42874225	G	C	het	c.G1343C	p.S448T
'AKAP11'	Compound-het-het	13	42887253	42887253	C	G	het	c.C5344G	p.P1782A
'AKAP13'	Compound-het-het	15	86207925	86207925	T	C	het	c.T659C:c.T4877C:c.T4943C:c.T4931C	p.V220A:p.V1626A:p.V1648A:p.V1644A
'AKAP13'	Compound-het-het	15	86273754	86273754	C	A	het	c.C1833A:c.C7110A:c.C7098A	p.H611Q:p.H2370Q:p.H2366Q
'AKAP13'	Compound-het-het	15	86207925	86207925	T	C	het	c.T659C:c.T4877C:c.T4943C:c.T4931C	p.V220A:p.V1626A:p.V1648A:p.V1644A
'AKAP13'	Compound-het-het	15	86273754	86273754	C	A	het	c.C1833A:c.C7110A:c.C7098A	p.H611Q:p.H2370Q:p.H2366Q
'AKAP13'	Compound-het-het	15	86123833	86123833	T	G	het	c.T2534G	p.V845G
'AKAP13'	Compound-het-het	15	86163392	86163392	G	T	het	c.G70T	p.V24L
'AKAP13'	Compound-het-het	15	86278362	86278362	T	G	het	c.T2157G:c.T7434G:c.T7422G	p.H719Q:p.H2478Q:p.H2474Q
'AKAP9'	Compound-het-het	7	91709400	91709400	G	-	het	c.1491delG:c.7953delG:c.7989delG	p.G498Afs*70:p.G2652Afs*70:p.G2664Afs*70
'AKAP9'	Compound-het-het	7	91726527	91726527	G	C	het	c.G3792C:c.G10104C:c.G10254C:c.G10266C	p.Q1264H:p.Q3368H:p.Q3418H:p.Q3422H
'AKAP9'	Compound-het-het	7	91670136	91670136	G	A	het	c.G4841A:c.G4877A	p.R1614Q:p.R1626Q
'AKAP9'	Compound-het-het	7	91726202	91726202	G	A	het	c.G3467A:c.G9779A:c.G9929A:c.G9941A	p.R1156Q:p.R3260Q:p.R3310Q:p.R3314Q
'AKAP9'	Compound-het-het	7	91729028	91729028	T	G	het	c.T4279G:c.T10591G:c.T10741G:c.T10753G	p.C1427G:p.C3531G:p.C3581G:p.C3585G
'AKAP9'	Compound-het-het	7	91670136	91670136	G	A	het	c.G4841A:c.G4877A	p.R1614Q:p.R1626Q
'AKAP9'	Compound-het-het	7	91726202	91726202	G	A	het	c.G3467A:c.G9779A:c.G9929A:c.G9941A	p.R1156Q:p.R3260Q:p.R3310Q:p.R3314Q
'AKAP9'	Compound-het-het	7	91694604	91694604	G	A	het	c.G6037A:c.G6073A	p.E2013K:p.E2025K
'AKAP9'	Compound-het-het	7	91700267	91700267	T	C	het	c.T94C:c.T6556C:c.T6592C	p.S32P:p.S2186P:p.S2198P
'AKNA'	Compound-het-het	9	117099536	117099536	G	A	het	c.C953T:c.C3875T:c.C2498T:c.C4118T	p.P318L:p.P1292L:p.P833L:p.P1373L
'AKNA'	Compound-het-het	9	117110160	117110160	T	C	het	c.A77G:c.A2999G:c.A1622G:c.A3242G	p.Q26R:p.Q1000R:p.Q541R:p.Q1081R
'AKNA'	Compound-het-het	9	117110088	117110088	C	T	het	c.G149A:c.G3071A:c.G1694A:c.G3314A	p.R50H:p.R1024H:p.R565H:p.R1105H
'AKNA'	Compound-het-het	9	117122324	117122324	C	T	het	c.G1900A:c.G523A:c.G2143A	p.A634T:p.A175T:p.A715T
'AL133373.1'	Compound-het-het	14	92040763	92040763	G	T	het	c.C194A	p.S65X
'AL137655'	Recessive	11	169007	169007	T	A	hom	c.A410T	p.H137L
'AL160286.1'	Recessive	1	179457770	179457777	CTTTCTTT	-	hom	c.29_36del	p.E10Gfs*14
'AL160286.1'	Recessive	1	179457770	179457772	CTT	-	hom	c.34_36del	p.K12del
'AL160286.1'	Recessive	1	179457770	179457772	CTT	-	hom	c.34_36del	p.K12del
'AL160286.1'	Recessive	1	179457770	179457780	CTTTCTTTCTT	-	hom	c.26_36del	p.K9Rfs*14
'AL160286.1'	Recessive	1	179457770	179457770	-	TTTT	hom	c.35_36insAAAA	p.E13Kfs*15
'AL160286.1'	Recessive	1	179457766	179457796	TCTCCTTTCTTTCTTTCTTTCTTTCTTTCTT	-	hom	c.10_40del	p.K4Efs*25
'AL160286.1'	Recessive	1	179457770	179457770	-	TTTT	hom	c.35_36insAAAA	p.E13Kfs*15
'AL160286.1'	Recessive	1	179457773	179457773	-	TCTTTCTTTCTTTC	hom	c.32_33insGAAAGAAAGAAAGA	p.E15Kfs*29
'AL160286.1'	Recessive	1	179457770	179457770	-	TTTT	hom	c.35_36insAAAA	p.E13Kfs*15
'AL160286.1'	Recessive	1	179457770	179457780	CTTTCTTTCTT	-	hom	c.26_36del	p.K9Rfs*14
'AL160286.1'	Recessive	1	179457770	179457780	CTTTCTTTCTT	-	hom	c.26_36del	p.K9Rfs*14
'AL354898.1'	Compound-het-het	9	133278709	133278709	G	A	het	c.G358A	p.A120T
'AL354898.1'	Compound-het-het	9	133281466	133281466	G	A	het	c.G815A	p.R272H
'AL359195.1'	Compound-het-het	10	82013183	82013183	C	T	het	c.C701T	p.P234L
'AL359195.1'	Compound-het-het	10	82013316	82013316	A	G	het	c.A834G	p.I278M
'AL390778.1'	Compound-het-het	9	138150892	138150892	C	T	het	c.G355A	p.V119I
'AL390778.1'	Compound-het-het	9	138150961	138150961	G	A	het	c.C286T	p.R96W
'AL390778.1'	Compound-het-het	9	138150717	138150798	GGGGCGACCAAGGTGATGCCAACTGCATGGGGTGACTTCGGTGATGCCCACTGTATGGGGTGACGGTGGTGATGCCGACCGC	-	het	c.449_530del	p.C150Yfs*68
'AL390778.1'	Compound-het-het	9	138151148	138151175	GGTGATGCCAACCATATGGGGTGACGGT	-	het	c.101_128del	p.H34Rfs*202
'AL390778.1'	Compound-het-het	9	138150717	138150798	GGGGCGACCAAGGTGATGCCAACTGCATGGGGTGACTTCGGTGATGCCCACTGTATGGGGTGACGGTGGTGATGCCGACCGC	-	het	c.449_530del	p.C150Yfs*68
'AL390778.1'	Recessive	9	138150864	138150864	C	T	hom	c.G383A	p.R128H
'AL589739.1'	Recessive	1	2258679	2258679	-	ACACAGAAACACACAGAAACACAGAAACAAACACAGAG	hom	c.99_100insACACAGAAACACACAGAAACACAGAAACAAACACAGAG	p.H34Tfs*133
'AL591684.1'	Recessive	10	48277925	48277925	A	-	hom	c.418delA	p.G141Afs*32
'AL626787.1'	Compound-het-het	1	166028282	166028282	A	C	het	c.T186G	p.S62R
'AL646016.1'	Compound-het-het	1	240643495	240643495	G	T	het	c.C10A	p.P4T
'AL832378'	Recessive	4	100570977	100570977	C	T	hom	c.G4829A	p.R1610H
'AL833634'	Compound-het-het	11	112832283	112832283	-	T	het	c.126_127insT	p.G43Wfs*22
'AL833634'	Compound-het-het	11	112832283	112832283	-	T	het	c.126_127insT	p.G43Wfs*22
'ALDH1L1'	Compound-het-het	3	125824719	125824719	C	A	het	c.G2200T:c.G2533T:c.G2503T	p.A734S:p.A845S:p.A835S
'ALDH1L1'	Compound-het-het	3	125833890	125833890	G	T	het	c.C197A	p.S66X
'ALDH1L1'	Compound-het-het	3	125833804	125833804	C	T	het	c.G283A	p.G95R
'ALDH1L1'	Compound-het-het	3	125855726	125855726	C	T	het	c.G922A:c.G1255A:c.G1225A	p.V308M:p.V419M:p.V409M
'ALDH1L1'	Recessive	3	125876281	125876281	C	T	hom	c.G463A:c.G433A	p.D155N:p.D145N
'ALDH3A1'	Compound-het-het	17	19645341	19645341	T	G	het	c.A635C:c.A665C:c.A446C	p.N212T:p.N222T:p.N149T
'ALDH3A1'	Compound-het-het	17	19646681	19646681	G	A	het	c.C228T:c.C258T:c.C39T	p.P76P:p.P86P:p.P13P
'ALDH3A1'	Compound-het-het	17	19645341	19645341	T	G	het	c.A635C:c.A665C:c.A446C	p.N212T:p.N222T:p.N149T
'ALDH3A1'	Compound-het-het	17	19646681	19646681	G	A	het	c.C228T:c.C258T:c.C39T	p.P76P:p.P86P:p.P13P
'ALDOA'	Compound-het-het	16	30078639	30078639	C	T	het	c.C64T:c.C226T	p.R22C:p.R76C
'ALG10B'	Compound-het-het	12	38712220	38712220	T	C	het	c.T329C	p.L110S
'ALG10B'	Compound-het-het	12	38714509	38714509	C	G	het	c.C916G	p.L306V
'ALG1L2'	Recessive	3	129800873	129800873	C	T	hom	c.C14T	p.A5V
'ALG1L9P'	Compound-het-het	11	71527634	71527634	A	G	het	c.T827C	p.I276T
'ALG1L9P'	Compound-het-het	11	71527634	71527634	A	G	het	c.T827C	p.I276T
'ALG6'	Compound-het-het	1	63902609	63902609	A	G	het	c.A1448G:c.A1442G	p.N483S:p.N481S
'ALG6'	Compound-het-het	1	63902632	63902632	T	G	het	c.T1471G:c.T1465G	p.F491V:p.F489V
'ALG8'	Compound-het-het	11	77825760	77825760	C	T	het	c.G631A	p.G211R
'ALG8'	Compound-het-het	11	77825771	77825771	G	A	het	c.C620T	p.T207I
'ALG9'	Compound-het-het	11	111676013	111676013	G	A	het	c.C94T	p.R32X
'ALLC'	Compound-het-het	2	3730644	3730644	T	C	het	c.T491C	p.I164T
'ALMS1'	Recessive	2	73677817	73677817	C	T	hom	c.C4034T:c.C4160T	p.P1345L:p.P1387L
'ALMS1'	Recessive	2	73718198	73718198	C	G	hom	c.C8983G:c.C9109G	p.P2995A:p.P3037A
'ALMS1'	Recessive	2	73677817	73677817	C	T	hom	c.C4034T:c.C4160T	p.P1345L:p.P1387L
'ALMS1'	Recessive	2	73718198	73718198	C	G	hom	c.C8983G:c.C9109G	p.P2995A:p.P3037A
'ALOX12-AS1'	Compound-het-het	17	6888816	6888816	C	A	het	c.G141T	p.W47C
'ALOX15B'	Compound-het-het	17	7948239	7948239	C	T	het	c.C769T	p.L257F
'ALPK1'	Compound-het-het	4	113351674	113351674	A	T	het	c.A737T:c.A971T	p.H246L:p.H324L
'ALPK1'	Compound-het-het	4	113359752	113359752	G	A	het	c.G3067A:c.G3301A	p.E1023K:p.E1101K
'ALPP'	Compound-het-het	2	233246489	233246489	C	A	het	c.C1592A	p.T531K
'ALPP'	Compound-het-het	2	233246489	233246489	C	A	het	c.C1592A	p.T531K
'ALS2CR11'	Compound-het-het	2	202356487	202356487	G	A	het	c.C4577T	p.S1526F
'ALS2CR11'	Compound-het-het	2	202400987	202400987	G	T	het	c.C1263A	p.D421E
'ALS2CR11'	Compound-het-het	2	202356487	202356487	G	A	het	c.C4577T	p.S1526F
'ALS2CR11'	Compound-het-het	2	202400987	202400987	G	T	het	c.C1263A	p.D421E
'ALS2CR8'	Compound-het-het	2	203848342	203848342	A	G	het	c.A1867G:c.A1909G:c.A1945G:c.A2173G	p.T623A:p.T637A:p.T649A:p.T725A
'ALS2CR8'	Compound-het-het	2	203806666	203806666	A	G	het	c.A41G	p.D14G
'ALS2CR8'	Compound-het-het	2	203817297	203817297	C	T	het	c.C16T:c.C58T:c.C232T:c.C94T:c.C286T:c.C322T	p.P6S:p.P20S:p.P78S:p.P32S:p.P96S:p.P108S
'ALS2CR8'	Compound-het-het	2	203806666	203806666	A	G	het	c.A41G	p.D14G
'ALS2CR8'	Compound-het-het	2	203817297	203817297	C	T	het	c.C16T:c.C58T:c.C232T:c.C94T:c.C286T:c.C322T	p.P6S:p.P20S:p.P78S:p.P32S:p.P96S:p.P108S
'AMBN'	Compound-het-het	4	71471965	71471965	G	A	het	c.G862A:c.G817A	p.G288S:p.G273S
'AMBN'	Compound-het-het	4	71472001	71472001	G	A	het	c.G898A:c.G853A	p.G300S:p.G285S
'AMBRA1'	Compound-het-het	11	46539857	46539857	G	A	het	c.C1922T	p.T641M
'AMBRA1'	Compound-het-het	11	46539857	46539857	G	A	het	c.C1922T	p.T641M
'AMDHD1'	Recessive	12	96359504	96359504	G	A	hom	c.G979A	p.V327I
'AMDHD1'	Recessive	12	96359504	96359504	G	A	hom	c.G979A	p.V327I
'AMER2'	Compound-het-het	13	25744148	25744148	G	A	het	c.C1610T:c.C1253T	p.S537L:p.S418L
'AMER2'	Compound-het-het	13	25744837	25744837	-	CTCGGGGGGTGCCCGGGGCTT	het	c.920_921insAAGCCCCGGGCACCCCCCGAG	p.E307_P308insSPGHPPR
'AMH'	Compound-het-het	19	2251229	2251229	C	T	het	c.C956T	p.A319V
'AMH'	Compound-het-het	19	2251264	2251264	T	C	het	c.T991C	p.S331P
'AMN'	Compound-het-het	14	103390139	103390139	C	-	het	c.135delC	p.G46Afs*153
'AMN'	Compound-het-het	14	103390144	103390144	C	A	het	c.C140A	p.A47D
'AMN'	Compound-het-het	14	103390147	103390148	TT	-	het	c.143_144del	p.V48Gfs*60
'AMN'	Compound-het-het	14	103390150	103390156	AGTTCCC	-	het	c.146_152del	p.E49Gfs*148
'AMN'	Compound-het-het	14	103390160	103390160	G	-	het	c.156delG	p.D53Tfs*146
'AMOTL2'	Compound-het-het	3	134084730	134084730	C	T	het	c.G1208A:c.G1382A	p.R403H:p.R461H
'AMOTL2'	Compound-het-het	3	134078137	134078137	G	C	het	c.C2092G:c.C2086G:c.C2266G	p.R698G:p.R696G:p.R756G
'AMOTL2'	Compound-het-het	3	134079224	134079224	C	A	het	c.G1607T:c.G1601T:c.G1781T	p.G536V:p.G534V:p.G594V
'AMZ1'	Compound-het-het	7	2749370	2749370	C	T	het	c.C698T:c.C868T	p.A233V:p.R290W
'AMZ1'	Compound-het-het	7	2752346	2752346	C	T	het	c.C1331T	p.T444M
'AMZ2'	Compound-het-het	17	66244805	66244805	G	T	het	c.G47T	p.C16F
'AMZ2'	Compound-het-het	17	66244805	66244805	G	T	het	c.G47T	p.C16F
'ANAPC11'	Compound-het-het	17	79857137	79857137	C	G	het	c.C129G	p.S43R
'ANAPC11'	Compound-het-het	17	79857137	79857137	C	G	het	c.C129G	p.S43R
'ANK3'	Compound-het-het	10	61832798	61832798	C	T	het	c.G7841A	p.R2614H
'ANK3'	Compound-het-het	10	61834628	61834628	G	A	het	c.C6011T	p.A2004V
'ANK3'	Compound-het-het	10	61832105	61832105	C	T	het	c.G8534A	p.G2845E
'ANK3'	Compound-het-het	10	61835940	61835940	C	T	het	c.G4699A	p.V1567M
'ANKAR'	Compound-het-het	2	190554267	190554267	A	G	het	c.A616G:c.A403G	p.T206A:p.T135A
'ANKAR'	Compound-het-het	2	190571797	190571797	A	G	het	c.A1336G:c.A2044G:c.A1831G	p.T446A:p.T682A:p.T611A
'ANKDD1B'	Recessive	5	74907638	74907638	C	A	hom	c.C179A	p.A60D
'ANKDD1B'	Recessive	5	74907638	74907638	C	A	hom	c.C179A	p.A60D
'ANKFN1'	Compound-het-het	17	54517744	54517744	A	G	het	c.A976G	p.N326D
'ANKFN1'	Compound-het-het	17	54588326	54588334	AGGAGCCCA	-	het	c.3146_3154del	p.P1051_E1053del
'ANKFN1'	Compound-het-het	17	54517744	54517744	A	G	het	c.A976G	p.N326D
'ANKFN1'	Compound-het-het	17	54588326	54588334	AGGAGCCCA	-	het	c.3146_3154del	p.P1051_E1053del
'ANKLE1'	Compound-het-het	19	17397263	17397263	C	T	het	c.C1750T:c.C1738T:c.C1639T	p.R584W:p.R580W:p.R547W
'ANKLE1'	Compound-het-het	19	17393738	17393738	G	T	het	c.G387T:c.G453T:c.G549T:c.G354T	p.Q129H:p.Q151H:p.Q183H:p.Q118H
'ANKLE1'	Compound-het-het	19	17397484	17397501	TGTGTGTGTGTGTGTGTT	-	het	c.1754_1771del	p.L591_C596del
'ANKLE1'	Compound-het-het	19	17396623	17396623	C	A	het	c.C1670A:c.C1658A:c.C1559A	p.A557D:p.A553D:p.A520D
'ANKLE1'	Compound-het-het	19	17397490	17397501	TGTGTGTGTGTT	-	het	c.1760_1771del	p.L591_C594del
'ANKLE1'	Compound-het-het	19	17392672	17392672	C	T	het	c.C14T	p.P5L
'ANKLE1'	Compound-het-het	19	17394981	17394981	G	A	het	c.G1282A:c.G1270A:c.G1171A:c.G1204A	p.A428T:p.A424T:p.A391T:p.A402T
'ANKLE1'	Compound-het-het	19	17397492	17397501	TGTGTGTGTT	-	het	c.1762_1771del	p.L591Vfs*15
'ANKLE1'	Recessive	19	17397478	17397478	-	TGTT	hom	c.1748_1749insTGTT	p.C584Vfs*42
'ANKMY1'	Compound-het-het	2	241463317	241463317	G	A	het	c.C860T:c.C986T:c.C1127T:c.C1364T:c.C1550T:c.C833T:c.C1817T	p.A287V:p.A329V:p.A376V:p.A455V:p.A517V:p.A278V:p.A606V
'ANKMY1'	Compound-het-het	2	241463495	241463495	G	A	het	c.C682T:c.C808T:c.C949T:c.C1186T:c.C1372T:c.C1639T	p.R228W:p.R270W:p.R317W:p.R396W:p.R458W:p.R547W
'ANKMY1'	Compound-het-het	2	241492300	241492300	A	-	het	c.217delT	p.S73Rfs*27
'ANKMY1'	Compound-het-het	2	241492305	241492305	A	C	het	c.T212G	p.L71R
'ANKRD11'	Compound-het-het	16	89347441	89347441	G	A	het	c.C5509T	p.P1837S
'ANKRD11'	Compound-het-het	16	89348289	89348289	T	C	het	c.A4661G	p.K1554R
'ANKRD11'	Compound-het-het	16	89347612	89347612	C	T	het	c.G5338A	p.A1780T
'ANKRD11'	Compound-het-het	16	89350766	89350766	G	C	het	c.C2184G	p.I728M
'ANKRD11'	Compound-het-het	16	89334661	89334661	G	A	het	c.G143A	p.G48E
'ANKRD11'	Compound-het-het	16	89347441	89347441	G	A	het	c.C5509T	p.P1837S
'ANKRD16'	Compound-het-het	10	5926032	5926032	T	C	het	c.A587G	p.Y196C
'ANKRD16'	Compound-het-het	10	5926032	5926032	T	C	het	c.A587G	p.Y196C
'ANKRD18A'	Compound-het-het	9	38588620	38588620	A	G	het	c.T215C:c.T2045C	p.L72S:p.L682S
'ANKRD18A'	Compound-het-het	9	38603188	38603188	G	T	het	c.C830A	p.A277E
'ANKRD18A'	Compound-het-het	9	38607437	38607437	C	T	het	c.G794A	p.R265Q
'ANKRD18A'	Compound-het-het	9	38588573	38588573	G	A	het	c.C262T:c.C2092T	p.R88C:p.R698C
'ANKRD18A'	Compound-het-het	9	38595660	38595660	T	A	het	c.A1677T	p.Q559H
'ANKRD18A'	Compound-het-het	9	38588573	38588573	G	A	het	c.C262T:c.C2092T	p.R88C:p.R698C
'ANKRD18A'	Compound-het-het	9	38595660	38595660	T	A	het	c.A1677T	p.Q559H
'ANKRD18A'	Compound-het-het	9	38588620	38588620	A	G	het	c.T215C:c.T2045C	p.L72S:p.L682S
'ANKRD18A'	Compound-het-het	9	38603188	38603188	G	T	het	c.C830A	p.A277E
'ANKRD18A'	Compound-het-het	9	38607437	38607437	C	T	het	c.G794A	p.R265Q
'ANKRD18A'	Compound-het-het	9	38575537	38575537	G	A	het	c.C263T:c.C314T:c.C1070T:c.C2900T	p.T88M:p.T105M:p.T357M:p.T967M
'ANKRD18A'	Compound-het-het	9	38588620	38588620	A	G	het	c.T215C:c.T2045C	p.L72S:p.L682S
'ANKRD18B'	Compound-het-het	9	33541216	33541216	G	C	het	c.G880C	p.G294R
'ANKRD18B'	Compound-het-het	9	33548841	33548843	AGC	-	het	c.12_14del:c.1869_1871del	p.A5del:p.A624del
'ANKRD20A1'	Compound-het-het	9	67927014	67927014	G	T	het	c.G142T	p.E48X
'ANKRD20A1'	Compound-het-het	9	67968657	67968657	G	A	het	c.G2216A	p.R739H
'ANKRD20A1'	Recessive	9	67925135	67925135	A	G	hom	c.T76C	p.C26R
'ANKRD20A3'	Compound-het-het	9	67927014	67927014	G	T	het	c.G142T	p.E48X
'ANKRD20A3'	Compound-het-het	9	67968657	67968657	G	A	het	c.G2216A	p.R739H
'ANKRD20A3'	Recessive	9	67925135	67925135	A	G	hom	c.T76C	p.C26R
'ANKRD20A4'	Recessive	9	69423641	69423641	T	G	hom	c.T1937G	p.M646R
'ANKRD20A4-ANKRD20A20P'	Recessive	9	69423641	69423641	T	G	hom	c.T1937G	p.M646R
'ANKRD24'	Compound-het-het	19	4216582	4216582	G	T	het	c.G1695T:c.G1338T:c.G1425T	p.M565I:p.M446I:p.M475I
'ANKRD24'	Compound-het-het	19	4217096	4217096	G	A	het	c.G2209A:c.G1852A:c.G1939A	p.A737T:p.A618T:p.A647T
'ANKRD30A'	Compound-het-het	10	37447445	37447445	A	C	het	c.A1663C	p.T555P
'ANKRD30A'	Compound-het-het	10	37447451	37447451	G	A	het	c.G1669A	p.G557R
'ANKRD30B'	Compound-het-het	18	14808681	14808681	G	T	het	c.G2324T	p.G775V
'ANKRD30B'	Compound-het-het	18	14810172	14810172	A	C	het	c.A2481C	p.L827F
'ANKRD34C'	Compound-het-het	15	79586159	79586159	A	G	het	c.A533G	p.D178G
'ANKRD34C'	Compound-het-het	15	79586669	79586669	C	A	het	c.C1043A	p.T348N
'ANKRD34C'	Compound-het-het	15	79586693	79586695	GTG	-	het	c.1067_1069del	p.G357del
'ANKRD34C'	Compound-het-het	15	79586159	79586159	A	G	het	c.A533G	p.D178G
'ANKRD34C'	Compound-het-het	15	79586669	79586669	C	A	het	c.C1043A	p.T348N
'ANKRD36'	Compound-het-het	2	97862486	97862486	A	G	het	c.A2614G	p.I872V
'ANKRD36'	Compound-het-het	2	97779551	97779551	A	T	het	c.A75T	p.Q25H
'ANKRD36'	Compound-het-het	2	97779555	97779555	C	T	het	c.C79T	p.P27S
'ANKRD36'	Compound-het-het	2	97779556	97779556	C	A	het	c.C80A	p.P27H
'ANKRD36'	Compound-het-het	2	97910952	97910952	A	C	het	c.A4628C	p.E1543A
'ANKRD36'	Recessive	2	97915896	97915896	G	A	hom	c.G5818A	p.E1940K
'ANKRD36'	Recessive	2	97915896	97915896	G	A	hom	c.G5818A	p.E1940K
'ANKRD36'	Compound-het-het	2	97910952	97910952	A	C	het	c.A4628C	p.E1543A
'ANKRD36'	Compound-het-het	2	97910952	97910952	A	C	het	c.A4628C	p.E1543A
'ANKRD36'	Compound-het-het	2	97779489	97779489	A	G	het	c.A13G	p.K5E
'ANKRD36C'	Recessive	2	96568682	96568682	G	C	hom	c.C3292G	p.L1098V
'ANKRD62'	Compound-het-het	18	12127880	12127880	T	C	het	c.T2654C:c.T2696C	p.L885S:p.L899S
'ANKS3'	Compound-het-het	16	4751035	4751035	T	C	het	c.A602G:c.A701G:c.A899G:c.A833G:c.A1001G:c.A1220G	p.D201G:p.D234G:p.D300G:p.D278G:p.D334G:p.D407G
'ANKS3'	Compound-het-het	16	4780077	4780077	C	T	het	c.G74A	p.G25E
'ANKS6'	Compound-het-het	9	101540607	101540607	C	T	het	c.G565A:c.G883A:c.G1468A	p.E189K:p.E295K:p.E490K
'ANKS6'	Compound-het-het	9	101552590	101552590	C	T	het	c.G73A:c.G658A	p.A25T:p.A220T
'ANKUB1'	Compound-het-het	3	149481753	149481753	G	-	het	c.1254delC	p.D418Efs*7
'ANKUB1'	Compound-het-het	3	149485835	149485835	A	G	het	c.T614C	p.I205T
'ANKUB1'	Compound-het-het	3	149484960	149484960	A	G	het	c.T1489C	p.C497R
'ANKUB1'	Compound-het-het	3	149498097	149498097	T	C	het	c.A380G	p.Y127C
'ANKUB1'	Compound-het-het	3	149484960	149484960	A	G	het	c.T1489C	p.C497R
'ANKUB1'	Compound-het-het	3	149498097	149498097	T	C	het	c.A380G	p.Y127C
'ANLN'	Compound-het-het	7	36435956	36435956	A	G	het	c.A100G:c.A34G	p.M34V:p.M12V
'ANO2'	Compound-het-het	12	6031964	6031964	G	A	het	c.C17T	p.P6L
'ANO7'	Compound-het-het	2	242154224	242154224	C	T	het	c.C1895T:c.C1892T	p.A632V:p.A631V
'ANXA2'	Compound-het-het	15	60653207	60653207	G	A	het	c.C95T:c.C290T:c.C344T:c.C374T	p.T32M:p.T97M:p.T115M:p.T125M
'ANXA8'	Recessive	10	48277925	48277925	A	-	hom	c.418delA	p.G141Afs*32
'ANXA8L1'	Recessive	10	47920012	47920012	C	T	hom	c.C1415T:c.C1442T	p.S472L:p.S481L
'AP000251.3'	Compound-het-het	21	32931855	32931855	C	-	het	c.282delC	p.D94Efs*4
'AP000251.3'	Compound-het-het	21	32932392	32932392	A	G	het	c.A398G	p.H133R
'AP000347.2'	Compound-het-het	22	24040070	24040070	G	A	het	c.G68A	p.R23H
'AP000350.10'	Compound-het-het	22	24225322	24225322	G	A	het	c.G1271A	p.R424H
'AP000350.10'	Compound-het-het	22	24237108	24237108	G	A	het	c.G581A	p.S194N
'AP001372.2'	Compound-het-het	11	74208090	74208090	G	T	het	c.G140T	p.R47I
'AP002387.1'	Compound-het-het	11	71118730	71118730	G	A	het	c.C89T	p.P30L
'AP002387.1'	Compound-het-het	11	71118760	71118760	G	A	het	c.C59T	p.A20V
'AP006621.8'	Compound-het-het	11	829121	829121	C	T	het	c.C407T	p.A136V
'AP006621.8'	Compound-het-het	11	831055	831055	G	A	het	c.G980A	p.R327Q
'AP2A2'	Compound-het-het	11	1000480	1000480	C	G	het	c.C2008G:c.C2005G	p.P670A:p.P669A
'AP5Z1'	Compound-het-het	7	4829938	4829938	C	G	het	c.C85G	p.L29V
'AP5Z1'	Compound-het-het	7	4830897	4830897	A	G	het	c.A2305G	p.T769A
'APBB2'	Compound-het-het	4	40823962	40823962	G	A	het	c.C391T:c.C1972T:c.C1969T:c.C2035T:c.C2038T	p.R131C:p.R658C:p.R657C:p.R679C:p.R680C
'APBB2'	Compound-het-het	4	41015866	41015866	G	T	het	c.C569A	p.S190Y
'APBB3'	Compound-het-het	5	139941470	139941470	C	G	het	c.G737C	p.X246S
'APLP2'	Compound-het-het	11	129990638	129990638	A	T	het	c.A441T:c.A471T:c.A396T:c.A162T	p.E147D:p.E157D:p.E132D:p.E54D
'APMAP'	Compound-het-het	20	24944641	24944641	C	A	het	c.G866T	p.R289L
'APMAP'	Compound-het-het	20	24944641	24944641	C	A	het	c.G866T	p.R289L
'APMAP'	Compound-het-het	20	24944580	24944580	G	A	het	c.C1120T	p.R374W
'APMAP'	Compound-het-het	20	24944580	24944580	G	A	het	c.C1120T	p.R374W
'APOB'	Compound-het-het	2	21364993	21364993	A	T	het	c.A4654T	p.I1552F
'APOB'	Compound-het-het	2	21227485	21227485	G	A	het	c.C11851T	p.H3951Y
'APOB'	Compound-het-het	2	21363395	21363395	T	C	het	c.T3056C	p.I1019T
'APOB'	Recessive	2	21255355	21255355	A	G	hom	c.T1223C	p.I408T
'APOB'	Compound-het-het	2	21229160	21229160	C	T	het	c.G10580A	p.R3527Q
'APOB'	Compound-het-het	2	21232044	21232044	C	T	het	c.G7696A	p.E2566K
'APOB'	Compound-het-het	2	21230498	21230498	C	G	het	c.G9242C	p.S3081T
'APOB'	Compound-het-het	2	21363154	21363154	A	G	het	c.A2815G	p.I939V
'APOB'	Compound-het-het	2	21233877	21233877	C	T	het	c.G5863A	p.V1955M
'APOB'	Compound-het-het	2	21364150	21364150	A	G	het	c.A3811G	p.T1271A
'APOBEC3F'	Compound-het-het	22	39441525	39441525	C	T	het	c.C544T	p.R182C
'APOBEC3F'	Compound-het-het	22	39448695	39448695	G	A	het	c.G1117A	p.E373K
'APOH'	Compound-het-het	17	64216797	64216797	G	T	het	c.C479A:c.C299A	p.A160D:p.A100D
'APPL1'	Compound-het-het	3	57283526	57283526	C	G	het	c.C1002G	p.D334E
'APPL1'	Compound-het-het	3	57283526	57283526	C	G	het	c.C1002G	p.D334E
'AQP7'	Recessive	9	33385156	33385156	C	T	hom	c.G421A:c.G646A	p.V141I:p.V216I
'AQPEP'	Compound-het-het	5	115329529	115329529	A	G	het	c.A1352G	p.Y451C
'AQPEP'	Compound-het-het	5	115339027	115339027	G	A	het	c.G538A:c.G1987A	p.D180N:p.D663N
'AR'	Recessive	X	66765159	66765159	-	GCA	hom	c.171_172insGCA	p.L57_Q58insA
'AR'	Recessive	X	66765159	66765173	GCAGCAGCAGCAGCA	-	hom	c.171_185del	p.Q76_Q80del
'AR'	Recessive	X	66914542	66914542	A	G	hom	c.A1913G	p.H638R
'AR'	Recessive	X	66765159	66765159	-	GCAGCAGCAGCAGCA	hom	c.171_172insGCAGCAGCAGCAGCA	p.L57_Q58insAAAAA
'AR'	Recessive	X	66765159	66765159	-	GCA	hom	c.171_172insGCA	p.L57_Q58insA
'AR'	Recessive	X	66765159	66765159	-	GCTGCA	hom	c.171_172insGCTGCA	p.L57_Q58insAA
'AR'	Recessive	X	66765159	66765173	GCAGCAGCAGCAGCA	-	hom	c.171_185del	p.Q76_Q80del
'AR'	Recessive	X	66765159	66765159	-	GCAGCAGCAGCAGCA	hom	c.171_172insGCAGCAGCAGCAGCA	p.L57_Q58insAAAAA
'AR'	Recessive	X	66765159	66765159	-	GCAGCAGCAGCA	hom	c.171_172insGCAGCAGCAGCA	p.L57_Q58insAAAA
'AR'	Recessive	X	66765159	66765159	-	GCA	hom	c.171_172insGCA	p.L57_Q58insA
'ARAP3'	Compound-het-het	5	141035765	141035765	T	C	het	c.A2854G:c.A3361G:c.A3868G	p.T952A:p.T1121A:p.T1290A
'ARAP3'	Compound-het-het	5	141041639	141041639	C	T	het	c.G1970A:c.G2984A	p.R657Q:p.R995Q
'ARFGAP1'	Compound-het-het	20	61908597	61908597	C	T	het	c.C161T:c.C224T:c.C383T	p.S54L:p.S75L:p.S128L
'ARFGAP2'	Compound-het-het	11	47189728	47189728	C	T	het	c.G209A:c.G608A:c.G695A:c.G1016A	p.R70H:p.R203H:p.R232H:p.R339H
'ARG1'	Compound-het-het	6	131902367	131902367	T	A	het	c.T338A:c.T314A	p.I113N:p.I105N
'ARG1'	Compound-het-het	6	131902370	131902370	G	C	het	c.G341C:c.G317C	p.G114A:p.G106A
'ARG1'	Compound-het-het	6	131902376	131902377	TC	-	het	c.347_348del:c.323_324del	p.S117Wfs*8:p.S109Wfs*8
'ARG1'	Compound-het-het	6	131902383	131902384	CC	-	het	c.354_355del:c.330_331del	p.H119Cfs*6:p.H111Cfs*6
'ARG1'	Compound-het-het	6	131902388	131902396	CCAGGGTCC	-	het	c.359_367del:c.335_343del	p.A120_H123delinsD:p.A112_H115delinsD
'ARG1'	Compound-het-het	6	131902399	131902399	-	T	het	c.370_371insT:c.346_347insT	p.P124Lfs*2:p.P116Lfs*2
'ARHGAP22'	Compound-het-het	10	49658596	49658596	G	C	het	c.C1075G:c.C1099G:c.C1306G:c.C1249G:c.C1576G:c.C1624G:c.C1594G	p.L359V:p.L367V:p.L436V:p.L417V:p.L526V:p.L542V:p.L532V
'ARHGAP22'	Compound-het-het	10	49658596	49658596	G	C	het	c.C1075G:c.C1099G:c.C1306G:c.C1249G:c.C1576G:c.C1624G:c.C1594G	p.L359V:p.L367V:p.L436V:p.L417V:p.L526V:p.L542V:p.L532V
'ARHGAP23'	Compound-het-het	17	36623095	36623095	G	T	het	c.G1171T:c.G889T	p.A391S:p.A297S
'ARHGAP23'	Compound-het-het	17	36623507	36623507	G	A	het	c.G1583A:c.G1301A	p.R528H:p.R434H
'ARHGAP23'	Compound-het-het	17	36622721	36622721	C	T	het	c.C797T:c.C515T	p.T266M:p.T172M
'ARHGAP23'	Compound-het-het	17	36623369	36623369	C	T	het	c.C1445T:c.C1163T	p.A482V:p.A388V
'ARHGAP23'	Compound-het-het	17	36622721	36622721	C	T	het	c.C797T:c.C515T	p.T266M:p.T172M
'ARHGAP23'	Compound-het-het	17	36623369	36623369	C	T	het	c.C1445T:c.C1163T	p.A482V:p.A388V
'ARHGAP25'	Compound-het-het	2	69043320	69043320	T	C	het	c.T764C	p.V255A
'ARHGAP25'	Compound-het-het	2	69014990	69014990	G	A	het	c.G347A:c.G368A:c.G290A	p.R116H:p.R123H:p.R97H
'ARHGAP25'	Compound-het-het	2	69043483	69043483	C	A	het	c.C846A:c.C849A:c.C750A:c.C867A:c.C870A	p.S282R:p.S283R:p.S250R:p.S289R:p.S290R
'ARHGAP27P2'	Compound-het-het	17	66195426	66195426	C	G	het	c.C343G	p.P115A
'ARHGAP27P2'	Compound-het-het	17	66195486	66195486	G	T	het	c.G403T	p.D135Y
'ARHGAP33'	Compound-het-het	19	36269370	36269370	G	A	het	c.G275A	p.R92H
'ARHGAP33'	Compound-het-het	19	36278265	36278265	G	A	het	c.G2390A:c.G2798A:c.G2315A	p.R797H:p.R933H:p.R772H
'ARHGAP33'	Compound-het-het	19	36279065	36279065	G	A	het	c.G3598A:c.G3115A:c.G3106A	p.G1200S:p.G1039S:p.G1036S
'ARHGAP39'	Compound-het-het	8	145771154	145771154	C	T	het	c.G2000A	p.R667Q
'ARHGAP39'	Compound-het-het	8	145773236	145773236	C	G	het	c.G1234C	p.A412P
'ARHGAP45'	Compound-het-het	19	1082977	1082977	G	C	het	c.G1561C:c.G2260C:c.G2305C:c.G2656C:c.G2704C:c.G2668C:c.G2737C	p.A521P:p.A754P:p.A769P:p.A886P:p.A902P:p.A890P:p.A913P
'ARHGAP45'	Compound-het-het	19	1085862	1085862	-	GGG	het	c.2173_2174insGGG:c.2872_2873insGGG:c.2917_2918insGGG:c.3268_3269insGGG:c.3316_3317insGGG:c.3280_3281insGGG:c.3349_3350insGGG	p.D724_E725insG:p.D957_E958insG:p.D972_E973insG:p.D1089_E1090insG:p.D1105_E1106insG:p.D1093_E1094insG:p.D1116_E1117insG
'ARHGAP45'	Compound-het-het	19	1085864	1085864	-	CGG	het	c.2175_2176insCGG:c.2874_2875insCGG:c.2919_2920insCGG:c.3270_3271insCGG:c.3318_3319insCGG:c.3282_3283insCGG:c.3351_3352insCGG	p.E725_D726insR:p.E958_D959insR:p.E973_D974insR:p.E1090_D1091insR:p.E1106_D1107insR:p.E1094_D1095insR:p.E1117_D1118insR
'ARHGAP45'	Compound-het-het	19	1082977	1082977	G	C	het	c.G1561C:c.G2260C:c.G2305C:c.G2656C:c.G2704C:c.G2668C:c.G2737C	p.A521P:p.A754P:p.A769P:p.A886P:p.A902P:p.A890P:p.A913P
'ARHGAP45'	Compound-het-het	19	1085862	1085862	-	GGG	het	c.2173_2174insGGG:c.2872_2873insGGG:c.2917_2918insGGG:c.3268_3269insGGG:c.3316_3317insGGG:c.3280_3281insGGG:c.3349_3350insGGG	p.D724_E725insG:p.D957_E958insG:p.D972_E973insG:p.D1089_E1090insG:p.D1105_E1106insG:p.D1093_E1094insG:p.D1116_E1117insG
'ARHGAP45'	Compound-het-het	19	1085864	1085864	-	CGG	het	c.2175_2176insCGG:c.2874_2875insCGG:c.2919_2920insCGG:c.3270_3271insCGG:c.3318_3319insCGG:c.3282_3283insCGG:c.3351_3352insCGG	p.E725_D726insR:p.E958_D959insR:p.E973_D974insR:p.E1090_D1091insR:p.E1106_D1107insR:p.E1094_D1095insR:p.E1117_D1118insR
'ARHGAP8'	Compound-het-het	22	45258162	45258162	G	A	het	c.G989A:c.G1082A:c.G1382A:c.G1355A:c.G1619A	p.R330Q:p.R361Q:p.R461Q:p.R452Q:p.R540Q
'ARHGAP8'	Compound-het-het	22	45128248	45128248	G	A	het	c.G532A:c.G505A:c.G601A	p.V178M:p.V169M:p.V201M
'ARHGEF10'	Compound-het-het	8	1893794	1893794	G	A	het	c.G2302A:c.G3358A:c.G3256A:c.G3370A:c.G3445A:c.G3442A	p.A768T:p.A1120T:p.A1086T:p.A1124T:p.A1149T:p.A1148T
'ARHGEF10'	Compound-het-het	8	1905362	1905362	G	A	het	c.G2900A:c.G3956A:c.G3854A:c.G3968A:c.G4043A:c.G4040A	p.R967Q:p.R1319Q:p.R1285Q:p.R1323Q:p.R1348Q:p.R1347Q
'ARHGEF10'	Compound-het-het	8	1876789	1876789	C	T	het	c.C1826T:c.C2882T:c.C2780T:c.C2894T:c.C2969T:c.C2966T	p.T609M:p.T961M:p.T927M:p.T965M:p.T990M:p.T989M
'ARHGEF10L'	Compound-het-het	1	17934354	17934354	C	T	het	c.C491T	p.A164V
'ARHGEF11'	Compound-het-het	1	156954154	156954154	A	C	het	c.T200G	p.V67G
'ARHGEF11'	Compound-het-het	1	156954161	156954161	G	A	het	c.C193T	p.R65C
'ARHGEF11'	Compound-het-het	1	156954154	156954154	A	C	het	c.T200G	p.V67G
'ARHGEF11'	Compound-het-het	1	156954161	156954161	G	A	het	c.C193T	p.R65C
'ARHGEF17'	Compound-het-het	11	73022727	73022727	A	T	het	c.A3044T	p.H1015L
'ARHGEF17'	Compound-het-het	11	73078685	73078685	G	A	het	c.G6052A	p.A2018T
'ARHGEF17'	Compound-het-het	11	73022727	73022727	A	T	het	c.A3044T	p.H1015L
'ARHGEF17'	Compound-het-het	11	73078685	73078685	G	A	het	c.G6052A	p.A2018T
'ARHGEF18'	Compound-het-het	19	7437912	7437912	G	A	het	c.G230A	p.R77Q
'ARHGEF18'	Compound-het-het	19	7448258	7448258	G	A	het	c.G1136A	p.G379E
'ARHGEF18'	Compound-het-het	19	7532208	7532208	C	A	het	c.C2554A:c.C2080A	p.Q852K:p.Q694K
'ARHGEF18'	Compound-het-het	19	7437912	7437912	G	A	het	c.G230A	p.R77Q
'ARHGEF18'	Compound-het-het	19	7448258	7448258	G	A	het	c.G1136A	p.G379E
'ARHGEF18'	Compound-het-het	19	7532208	7532208	C	A	het	c.C2554A:c.C2080A	p.Q852K:p.Q694K
'ARHGEF18'	Compound-het-het	19	7441637	7441637	G	C	het	c.G535C	p.V179L
'ARHGEF18'	Compound-het-het	19	7533823	7533823	C	T	het	c.C3029T:c.C2555T	p.A1010V:p.A852V
'ARHGEF18'	Compound-het-het	19	7441637	7441637	G	C	het	c.G535C	p.V179L
'ARHGEF18'	Compound-het-het	19	7533823	7533823	C	T	het	c.C3029T:c.C2555T	p.A1010V:p.A852V
'ARHGEF26'	Compound-het-het	3	153974676	153974676	-	TATC	het	c.1284_1285insTATC	p.I429Yfs*35
'ARHGEF26'	Compound-het-het	3	153839947	153839947	G	C	het	c.G166C	p.G56R
'ARHGEF26'	Compound-het-het	3	153840328	153840328	G	C	het	c.G547C	p.D183H
'ARHGEF35'	Recessive	7	143884953	143884953	T	C	hom	c.A524G	p.D175G
'ARHGEF35'	Recessive	7	143884953	143884953	T	C	hom	c.A524G	p.D175G
'ARHGEF37'	Compound-het-het	5	148989252	148989252	C	T	het	c.C452T	p.A151V
'ARHGEF37'	Compound-het-het	5	149001303	149001303	G	A	het	c.G1013A	p.R338Q
'ARHGEF4'	Compound-het-het	2	131673033	131673033	A	G	het	c.A524G	p.N175S
'ARHGEF4'	Compound-het-het	2	131803668	131803668	G	A	het	c.G485A:c.G1025A:c.G1766A:c.G1799A:c.G1979A	p.R162Q:p.R342Q:p.R589Q:p.R600Q:p.R660Q
'ARHGEF4'	Compound-het-het	2	131673033	131673033	A	G	het	c.A524G	p.N175S
'ARHGEF4'	Compound-het-het	2	131803668	131803668	G	A	het	c.G485A:c.G1025A:c.G1766A:c.G1799A:c.G1979A	p.R162Q:p.R342Q:p.R589Q:p.R600Q:p.R660Q
'ARHGEF4'	Compound-het-het	2	131672330	131672330	A	G	het	c.A811G	p.K271E
'ARHGEF4'	Compound-het-het	2	131673933	131673933	C	A	het	c.C1424A	p.P475H
'ARHGEF6'	Recessive	X	135762909	135762909	G	A	hom	c.C1223T:c.C1685T:c.C1304T	p.S408L:p.S562L:p.S435L
'ARID1B'	Compound-het-het	6	157099799	157099799	G	A	het	c.G562A:c.G736A	p.G188S:p.G246S
'ARID1B'	Compound-het-het	6	157454209	157454209	C	T	het	c.C646T:c.C787T:c.C2206T:c.C2380T:c.C2419T	p.P216S:p.P263S:p.P736S:p.P794S:p.P807S
'ARL13A'	Recessive	X	100243202	100243202	T	C	hom	c.T296C:c.T674C	p.M99T:p.M225T
'ARL13A'	Recessive	X	100240689	100240689	C	T	hom	c.C164T	p.S55L
'ARMC9'	Compound-het-het	2	232099940	232099940	T	C	het	c.T626C	p.I209T
'ARMC9'	Compound-het-het	2	232099940	232099940	T	C	het	c.T626C	p.I209T
'ARMC9'	Compound-het-het	2	232087444	232087444	T	G	het	c.T508G	p.S170A
'ARMC9'	Compound-het-het	2	232099940	232099940	T	C	het	c.T626C	p.I209T
'ARMCX4'	Compound-het-het	X	100749082	100749082	G	C	het	c.G5506C	p.G1836R
'ARMCX4'	Compound-het-het	X	100749089	100749089	G	A	het	c.G5513A	p.G1838E
'ARNT'	Compound-het-het	1	150789354	150789354	C	G	het	c.G1667C:c.G1712C:c.G1670C	p.G556A:p.G571A:p.G557A
'ARPC4-TTLL3'	Compound-het-het	3	9859377	9859377	G	C	het	c.G178C:c.G319C:c.G364C:c.G793C:c.G493C:c.G646C	p.D60H:p.D107H:p.D122H:p.D265H:p.D165H:p.D216H
'ARPC4-TTLL3'	Compound-het-het	3	9859377	9859377	G	C	het	c.G178C:c.G319C:c.G364C:c.G793C:c.G493C:c.G646C	p.D60H:p.D107H:p.D122H:p.D265H:p.D165H:p.D216H
'ARSB'	Compound-het-het	5	78076305	78076305	T	C	het	c.A1517G	p.H506R
'ARSB'	Compound-het-het	5	78260271	78260271	T	C	het	c.A658G	p.I220V
'ARSE'	Recessive	X	2867373	2867373	G	C	hom	c.C691G:c.C826G:c.C901G	p.L231V:p.L276V:p.L301V
'ARSH'	Recessive	X	2928171	2928171	G	A	hom	c.G193A	p.G65S
'ARSL'	Recessive	X	2867373	2867373	G	C	hom	c.C691G:c.C826G:c.C901G	p.L231V:p.L276V:p.L301V
'ARVCF'	Compound-het-het	22	19966562	19966562	C	T	het	c.G1249A:c.G1438A	p.V417I:p.V480I
'ARVCF'	Compound-het-het	22	19966562	19966562	C	T	het	c.G1249A:c.G1438A	p.V417I:p.V480I
'ASB12'	Recessive	X	63445451	63445451	T	-	hom	c.53delA:c.80delA:c.1205delA	p.E18Gfs*60:p.E27Gfs*60:p.E402Gfs*60
'ASB15'	Recessive	7	123267200	123267200	C	T	hom	c.C734T	p.S245L
'ASB15'	Recessive	7	123267200	123267200	C	T	hom	c.C734T	p.S245L
'ASB18'	Compound-het-het	2	237149994	237149994	T	A	het	c.A170T:c.A257T	p.N57I:p.N86I
'ASB9'	Recessive	X	15270486	15270486	T	C	hom	c.A323G	p.N108S
'ASB9'	Recessive	X	15270486	15270486	T	C	hom	c.A323G	p.N108S
'ASCC3'	Compound-het-het	6	100960621	100960621	T	A	het	c.A6249T	p.Q2083H
'ASCC3'	Compound-het-het	6	101214563	101214563	T	C	het	c.A1615G	p.M539V
'ASCC3'	Compound-het-het	6	100960621	100960621	T	A	het	c.A6249T	p.Q2083H
'ASCC3'	Compound-het-het	6	101214563	101214563	T	C	het	c.A1615G	p.M539V
'ASCC3'	Compound-het-het	6	101247393	101247393	C	T	het	c.G1183A	p.A395T
'ASCL1'	Recessive	12	103352172	103352172	-	GCAGCAGCAGCAGCA	hom	c.150_151insGCAGCAGCAGCAGCA	p.A50_Q51insAAAAA
'ASDURF'	Recessive	2	190530835	190530835	T	C	hom	c.T289C	p.X97Q
'ASDURF'	Compound-het-het	2	190530129	190530129	A	C	het	c.A172C	p.N58H
'ASIC4'	Compound-het-het	2	220379544	220379544	T	C	het	c.T479C	p.V160A
'ASIC4'	Compound-het-het	2	220402733	220402733	C	A	het	c.C1909A:c.C1966A	p.P637T:p.P656T
'ASMT'	Compound-het-het	X	1742098	1742098	G	A	het	c.G136A	p.V46M
'ASMT'	Compound-het-het	X	1752083	1752083	C	A	het	c.C603A:c.C687A	p.Y201X:p.Y229X
'ASMT'	Compound-het-het	X	1742098	1742098	G	A	het	c.G136A	p.V46M
'ASMT'	Compound-het-het	X	1752083	1752083	C	A	het	c.C603A:c.C687A	p.Y201X:p.Y229X
'ASMTL'	Compound-het-het	X	1522271	1522271	C	G	het	c.G1709C:c.G1529C:c.G1757C:c.G1583C	p.S570T:p.S510T:p.S586T:p.S528T
'ASMTL'	Compound-het-het	X	1522271	1522271	C	G	het	c.G1709C:c.G1529C:c.G1757C:c.G1583C	p.S570T:p.S510T:p.S586T:p.S528T
'ASNSD1'	Recessive	2	190530835	190530835	T	C	hom	c.T289C	p.X97Q
'ASNSD1'	Compound-het-het	2	190530129	190530129	A	C	het	c.A172C	p.N58H
'ASPM'	Compound-het-het	1	197072752	197072752	C	T	het	c.G5629A	p.A1877T
'ASPM'	Compound-het-het	1	197108936	197108936	C	A	het	c.G1987T	p.A663S
'ASXL3'	Recessive	18	31318613	31318613	G	T	hom	c.G1245T	p.E415D
'ATAD3A'	Compound-het-het	1	1447667	1447667	A	G	het	c.A19G	p.I7V
'ATAD3A'	Compound-het-het	1	1452737	1452737	C	T	het	c.C473T:c.C329T:c.C92T	p.A158V:p.A110V:p.A31V
'ATAD3A'	Compound-het-het	1	1447667	1447667	A	G	het	c.A19G	p.I7V
'ATAD3A'	Compound-het-het	1	1452737	1452737	C	T	het	c.C473T:c.C329T:c.C92T	p.A158V:p.A110V:p.A31V
'ATAD3A'	Compound-het-het	1	1447667	1447667	A	G	het	c.A19G	p.I7V
'ATAD3A'	Compound-het-het	1	1447667	1447667	A	G	het	c.A19G	p.I7V
'ATAD3A'	Compound-het-het	1	1452703	1452703	G	A	het	c.G439A:c.G295A:c.G58A	p.A147T:p.A99T:p.A20T
'ATAD3A'	Compound-het-het	1	1459770	1459770	C	T	het	c.C118T:c.C1351T:c.C1207T:c.C970T	p.R40W:p.R451W:p.R403W:p.R324W
'ATAD3A'	Compound-het-het	1	1447667	1447667	A	G	het	c.A19G	p.I7V
'ATAD3A'	Compound-het-het	1	1447667	1447667	A	G	het	c.A19G	p.I7V
'ATAD3A'	Compound-het-het	1	1452737	1452737	C	T	het	c.C473T:c.C329T:c.C92T	p.A158V:p.A110V:p.A31V
'ATAD3B'	Compound-het-het	1	1431060	1431060	T	C	het	c.T1810C	p.Y604H
'ATAD3B'	Compound-het-het	1	1417662	1417662	A	G	het	c.A659G:c.A155G	p.Q220R:p.Q52R
'ATAD3B'	Compound-het-het	1	1417927	1417927	C	T	het	c.C683T:c.C179T	p.T228M:p.T60M
'ATF4'	Compound-het-het	22	39917955	39917955	C	T	het	c.C404T	p.P135L
'ATF4'	Compound-het-het	22	39918321	39918321	G	A	het	c.G770A	p.R257H
'ATF4'	Compound-het-het	22	39917955	39917955	C	T	het	c.C404T	p.P135L
'ATF4'	Compound-het-het	22	39918321	39918321	G	A	het	c.G770A	p.R257H
'ATG2A'	Compound-het-het	11	64676761	64676761	C	T	het	c.G2186A	p.R729H
'ATG2A'	Compound-het-het	11	64680766	64680766	C	T	het	c.G698A	p.R233H
'ATG2B'	Recessive	14	96756094	96756094	T	C	hom	c.A5905G	p.I1969V
'ATG3'	Compound-het-het	3	112262921	112262921	T	G	het	c.A376C:c.A115C	p.I126L:p.I39L
'ATIC'	Compound-het-het	2	216176938	216176938	C	T	het	c.C73T	p.L25F
'ATIC'	Compound-het-het	2	216190748	216190748	G	A	het	c.G241A:c.G415A:c.G418A	p.A81T:p.A139T:p.A140T
'ATIC'	Compound-het-het	2	216176938	216176938	C	T	het	c.C73T	p.L25F
'ATIC'	Compound-het-het	2	216190748	216190748	G	A	het	c.G241A:c.G415A:c.G418A	p.A81T:p.A139T:p.A140T
'ATM'	Compound-het-het	11	108106435	108106435	A	G	het	c.A370G	p.I124V
'ATM'	Compound-het-het	11	108150316	108150316	A	G	het	c.A3383G	p.Q1128R
'ATP10A'	Compound-het-het	15	25959298	25959298	T	C	het	c.A1867G	p.S623G
'ATP10A'	Compound-het-het	15	25963484	25963484	C	T	het	c.G1426A	p.G476S
'ATP10A'	Compound-het-het	15	25981206	25981206	C	T	het	c.G737A	p.C246Y
'ATP10B'	Compound-het-het	5	160097633	160097633	C	T	het	c.G512A	p.R171H
'ATP10B'	Compound-het-het	5	160114968	160114968	C	G	het	c.G114C	p.Q38H
'ATP11A'	Compound-het-het	13	113536260	113536260	C	T	het	c.C434T:c.C3458T	p.A145V:p.A1153V
'ATP13A5'	Compound-het-het	3	193081090	193081090	C	T	het	c.G319A:c.G385A	p.E107K:p.E129K
'ATP1A4'	Compound-het-het	1	160125859	160125859	G	A	het	c.G436A	p.V146I
'ATP1A4'	Compound-het-het	1	160129260	160129260	A	G	het	c.A722G	p.H241R
'ATP1A4'	Compound-het-het	1	160141056	160141056	C	T	het	c.C1507T	p.R503W
'ATP1A4'	Compound-het-het	1	160144375	160144375	G	A	het	c.G2149A	p.V717I
'ATP2C2'	Compound-het-het	16	84494088	84494088	G	C	het	c.G95C	p.G32A
'ATP2C2'	Compound-het-het	16	84494121	84494121	G	C	het	c.G128C	p.R43P
'ATP2C2'	Compound-het-het	16	84494088	84494088	G	C	het	c.G95C	p.G32A
'ATP2C2'	Compound-het-het	16	84494121	84494121	G	C	het	c.G128C	p.R43P
'ATP2C2-AS1'	Compound-het-het	16	84494088	84494088	G	C	het	c.G95C	p.G32A
'ATP2C2-AS1'	Compound-het-het	16	84494121	84494121	G	C	het	c.G128C	p.R43P
'ATP2C2-AS1'	Compound-het-het	16	84494088	84494088	G	C	het	c.G95C	p.G32A
'ATP2C2-AS1'	Compound-het-het	16	84494121	84494121	G	C	het	c.G128C	p.R43P
'ATP6V0A1'	Compound-het-het	17	40672454	40672456	CCC	-	het	c.49_51del	p.P17del
'ATP8B1'	Compound-het-het	18	55342082	55342082	C	G	het	c.G1803C	p.K601N
'ATP8B1'	Compound-het-het	18	55355674	55355674	T	G	het	c.A14C:c.A1286C	p.E5A:p.E429A
'ATP8B3'	Compound-het-het	19	1796869	1796869	A	C	het	c.T1594G:c.T1453G	p.Y532D:p.Y485D
'ATP8B3'	Compound-het-het	19	1799778	1799778	A	T	het	c.T1561A	p.F521I
'ATP8B4'	Compound-het-het	15	50264910	50264910	G	T	het	c.C1112A	p.P371H
'ATP8B4'	Compound-het-het	15	50264910	50264910	G	T	het	c.C1112A	p.P371H
'ATP9B'	Compound-het-het	18	76870384	76870384	G	A	het	c.G149A:c.G323A:c.G167A	p.R50Q:p.R108Q:p.R56Q
'ATP9B'	Compound-het-het	18	77119494	77119494	G	A	het	c.G2126A	p.R709Q
'ATP9B'	Compound-het-het	18	76870384	76870384	G	A	het	c.G149A:c.G323A:c.G167A	p.R50Q:p.R108Q:p.R56Q
'ATP9B'	Compound-het-het	18	77119494	77119494	G	A	het	c.G2126A	p.R709Q
'ATRIP'	Compound-het-het	3	48506389	48506389	A	T	het	c.A2134T:c.A2215T:c.A1936T:c.A1834T	p.M712L:p.M739L:p.M646L:p.M612L
'ATRIP'	Compound-het-het	3	48508851	48508851	A	G	het	c.A962G:c.A797G:c.A767G:c.A380G	p.E321G:p.E266G:p.E256G:p.E127G
'ATRIP'	Compound-het-het	3	48506389	48506389	A	T	het	c.A2134T:c.A2215T:c.A1936T:c.A1834T	p.M712L:p.M739L:p.M646L:p.M612L
'ATRIP'	Compound-het-het	3	48508851	48508851	A	G	het	c.A962G:c.A797G:c.A767G:c.A380G	p.E321G:p.E266G:p.E256G:p.E127G
'ATXN1'	Compound-het-het	6	16327915	16327915	A	C	het	c.T627G	p.H209Q
'ATXN1'	Compound-het-het	6	16327939	16327939	C	A	het	c.G603T	p.Q201H
'ATXN1'	Compound-het-het	6	16327895	16327895	-	TGA	het	c.646_647insTCA	p.Q216delinsLK
'ATXN1'	Compound-het-het	6	16327898	16327898	-	TGA	het	c.643_644insTCA	p.Q215delinsLK
'ATXN1'	Compound-het-het	6	16327915	16327915	A	C	het	c.T627G	p.H209Q
'ATXN1'	Compound-het-het	6	16306858	16306858	G	A	het	c.C2150T	p.A717V
'ATXN1'	Compound-het-het	6	16327915	16327915	A	C	het	c.T627G	p.H209Q
'ATXN1'	Recessive	6	16327916	16327916	-	TGC	hom	c.625_626insGCA	p.H209delinsRN
'ATXN1'	Recessive	6	16327916	16327916	-	TGCTGC	hom	c.625_626insGCAGCA	p.H209delinsRSN
'ATXN2'	Compound-het-het	12	111891388	111891388	C	T	het	c.G346A	p.A116T
'ATXN2'	Compound-het-het	12	112036694	112036694	C	T	het	c.G625A:c.G145A	p.A209T:p.A49T
'ATXN2'	Compound-het-het	12	111891388	111891388	C	T	het	c.G346A	p.A116T
'ATXN2'	Compound-het-het	12	112036694	112036694	C	T	het	c.G625A:c.G145A	p.A209T:p.A49T
'ATXN2'	Compound-het-het	12	111891388	111891388	C	T	het	c.G346A	p.A116T
'ATXN2'	Compound-het-het	12	112036694	112036694	C	T	het	c.G625A:c.G145A	p.A209T:p.A49T
'ATXN2'	Compound-het-het	12	111891388	111891388	C	T	het	c.G346A	p.A116T
'ATXN2'	Compound-het-het	12	112036694	112036694	C	T	het	c.G625A:c.G145A	p.A209T:p.A49T
'ATXN2'	Compound-het-het	12	111891388	111891388	C	T	het	c.G346A	p.A116T
'ATXN2'	Compound-het-het	12	112036694	112036694	C	T	het	c.G625A:c.G145A	p.A209T:p.A49T
'ATXN3'	Compound-het-het	14	92537355	92537355	-	TGCTGCTGCTGCTGCTGCTGCTGCTGCTGCTGCTGCTGCTG	het	c.377_378insCAGCAGCAGCAGCAGCAGCAGCAGCAGCAGCAGCAGCAGCA:c.596_597insCAGCAGCAGCAGCAGCAGCAGCAGCAGCAGCAGCAGCAGCA:c.761_762insCAGCAGCAGCAGCAGCAGCAGCAGCAGCAGCAGCAGCAGCA:c.620_621insCAGCAGCAGCAGCAGCAGCAGCAGCAGCAGCAGCAGCAGCA:c.704_705insCAGCAGCAGCAGCAGCAGCAGCAGCAGCAGCAGCAGCAGCA:c.749_750insCAGCAGCAGCAGCAGCAGCAGCAGCAGCAGCAGCAGCAGCA:c.869_870insCAGCAGCAGCAGCAGCAGCAGCAGCAGCAGCAGCAGCAGCA:c.914_915insCAGCAGCAG…	p.Q126Hfs*40:p.Q199Hfs*39:p.Q254Hfs*39:p.Q207Hfs*40:p.Q235Hfs*40:p.Q250Hfs*40:p.Q290Hfs*40:p.Q305Hfs*40:p.Q298Hfs*40:p.Q314Hfs*40:p.Q304Hfs*40
'ATXN3'	Compound-het-het	14	92537355	92537355	-	TGCTGCTGCTGCTGCTGCTGCTGCTGCTGCTGCTGCTGCTGCTGCTGCTGCTGCTGCTGCTG	het	c.377_378insCAGCAGCAGCAGCAGCAGCAGCAGCAGCAGCAGCAGCAGCAGCAGCAGCAGCAGCAGCAGCA:c.596_597insCAGCAGCAGCAGCAGCAGCAGCAGCAGCAGCAGCAGCAGCAGCAGCAGCAGCAGCAGCAGCA:c.761_762insCAGCAGCAGCAGCAGCAGCAGCAGCAGCAGCAGCAGCAGCAGCAGCAGCAGCAGCAGCAGCA:c.620_621insCAGCAGCAGCAGCAGCAGCAGCAGCAGCAGCAGCAGCAGCAGCAGCAGCAGCAGCAGCAGCA:c.704_705insCAGCAGCAGCAGCAGCAGCAGCAGCAGCAGCAGCAGCAGCAGCAGCAGCAGCAGCAGCAGCA:c.749_750insCAGCAGCAGCAG…	p.Q126Hfs*47:p.Q199Hfs*46:p.Q254Hfs*46:p.Q207Hfs*47:p.Q235Hfs*47:p.Q250Hfs*47:p.Q290Hfs*47:p.Q305Hfs*47:p.Q298Hfs*47:p.Q314Hfs*47:p.Q304Hfs*47
'ATXN3'	Compound-het-het	14	92547336	92547336	C	T	het	c.G308A:c.G527A:c.G692A:c.G551A:c.G635A:c.G680A:c.G800A:c.G845A:c.G842A	p.R103Q:p.R176Q:p.R231Q:p.R184Q:p.R212Q:p.R227Q:p.R267Q:p.R282Q:p.R281Q
'ATXN3'	Recessive	14	92537355	92537355	-	CTGCTGCTGCTGCTGCTGCTGCTGCTGCTGCTGCTG	hom	c.377_378insCAGCAGCAGCAGCAGCAGCAGCAGCAGCAGCAGCAG:c.596_597insCAGCAGCAGCAGCAGCAGCAGCAGCAGCAGCAGCAG:c.761_762insCAGCAGCAGCAGCAGCAGCAGCAGCAGCAGCAGCAG:c.620_621insCAGCAGCAGCAGCAGCAGCAGCAGCAGCAGCAGCAG:c.704_705insCAGCAGCAGCAGCAGCAGCAGCAGCAGCAGCAGCAG:c.749_750insCAGCAGCAGCAGCAGCAGCAGCAGCAGCAGCAGCAG:c.869_870insCAGCAGCAGCAGCAGCAGCAGCAGCAGCAGCAGCAG:c.914_915insCAGCAGCAGCAGCAGCAGCAGCAGCAGCAGCAGCAG:c.893_8…	p.Q126delinsHSSSSSSSSSSSR:p.Q199delinsHSSSSSSSSSSSR:p.Q254delinsHSSSSSSSSSSSR:p.Q207delinsHSSSSSSSSSSSR:p.Q235delinsHSSSSSSSSSSSR:p.Q250delinsHSSSSSSSSSSSR:p.Q290delinsHSSSSSSSSSSSR:p.Q305delinsHSSSSSSSSSSSR:p.Q298delinsHSSSSSSSSSSSR:p.Q314delinsHSSSSSSSSSSSR:p.Q304delinsHSSSSSSSSSSSR
'ATXN3'	Recessive	14	92537355	92537355	-	TGCTGCTGCTGCTGCTGCTGCTGCTGCTGCTGCTGCTGCTG	hom	c.377_378insCAGCAGCAGCAGCAGCAGCAGCAGCAGCAGCAGCAGCAGCA:c.596_597insCAGCAGCAGCAGCAGCAGCAGCAGCAGCAGCAGCAGCAGCA:c.761_762insCAGCAGCAGCAGCAGCAGCAGCAGCAGCAGCAGCAGCAGCA:c.620_621insCAGCAGCAGCAGCAGCAGCAGCAGCAGCAGCAGCAGCAGCA:c.704_705insCAGCAGCAGCAGCAGCAGCAGCAGCAGCAGCAGCAGCAGCA:c.749_750insCAGCAGCAGCAGCAGCAGCAGCAGCAGCAGCAGCAGCAGCA:c.869_870insCAGCAGCAGCAGCAGCAGCAGCAGCAGCAGCAGCAGCAGCA:c.914_915insCAGCAGCAG…	p.Q126Hfs*40:p.Q199Hfs*39:p.Q254Hfs*39:p.Q207Hfs*40:p.Q235Hfs*40:p.Q250Hfs*40:p.Q290Hfs*40:p.Q305Hfs*40:p.Q298Hfs*40:p.Q314Hfs*40:p.Q304Hfs*40
'ATXN3'	Recessive	14	92537355	92537355	-	TGCTGCTGCTGCTGCTGCTGCTGCTGCTGCTGCTGCTGCTGCTGCTGCTGCTGCTGCTGCTG	hom	c.377_378insCAGCAGCAGCAGCAGCAGCAGCAGCAGCAGCAGCAGCAGCAGCAGCAGCAGCAGCAGCAGCA:c.596_597insCAGCAGCAGCAGCAGCAGCAGCAGCAGCAGCAGCAGCAGCAGCAGCAGCAGCAGCAGCAGCA:c.761_762insCAGCAGCAGCAGCAGCAGCAGCAGCAGCAGCAGCAGCAGCAGCAGCAGCAGCAGCAGCAGCA:c.620_621insCAGCAGCAGCAGCAGCAGCAGCAGCAGCAGCAGCAGCAGCAGCAGCAGCAGCAGCAGCAGCA:c.704_705insCAGCAGCAGCAGCAGCAGCAGCAGCAGCAGCAGCAGCAGCAGCAGCAGCAGCAGCAGCAGCA:c.749_750insCAGCAGCAGCAG…	p.Q126Hfs*47:p.Q199Hfs*46:p.Q254Hfs*46:p.Q207Hfs*47:p.Q235Hfs*47:p.Q250Hfs*47:p.Q290Hfs*47:p.Q305Hfs*47:p.Q298Hfs*47:p.Q314Hfs*47:p.Q304Hfs*47
'ATXN3'	Recessive	14	92537355	92537355	-	CTGCTGCTGCTGCTGCTGCTGCTGCTGCTGCTGCTG	hom	c.377_378insCAGCAGCAGCAGCAGCAGCAGCAGCAGCAGCAGCAG:c.596_597insCAGCAGCAGCAGCAGCAGCAGCAGCAGCAGCAGCAG:c.761_762insCAGCAGCAGCAGCAGCAGCAGCAGCAGCAGCAGCAG:c.620_621insCAGCAGCAGCAGCAGCAGCAGCAGCAGCAGCAGCAG:c.704_705insCAGCAGCAGCAGCAGCAGCAGCAGCAGCAGCAGCAG:c.749_750insCAGCAGCAGCAGCAGCAGCAGCAGCAGCAGCAGCAG:c.869_870insCAGCAGCAGCAGCAGCAGCAGCAGCAGCAGCAGCAG:c.914_915insCAGCAGCAGCAGCAGCAGCAGCAGCAGCAGCAGCAG:c.893_8…	p.Q126delinsHSSSSSSSSSSSR:p.Q199delinsHSSSSSSSSSSSR:p.Q254delinsHSSSSSSSSSSSR:p.Q207delinsHSSSSSSSSSSSR:p.Q235delinsHSSSSSSSSSSSR:p.Q250delinsHSSSSSSSSSSSR:p.Q290delinsHSSSSSSSSSSSR:p.Q305delinsHSSSSSSSSSSSR:p.Q298delinsHSSSSSSSSSSSR:p.Q314delinsHSSSSSSSSSSSR:p.Q304delinsHSSSSSSSSSSSR
'ATXN3'	Recessive	14	92537355	92537355	-	TGCTGCTGCTGCTGCTGCTGCTGCTGCTGCTGCTGCTGCTG	hom	c.377_378insCAGCAGCAGCAGCAGCAGCAGCAGCAGCAGCAGCAGCAGCA:c.596_597insCAGCAGCAGCAGCAGCAGCAGCAGCAGCAGCAGCAGCAGCA:c.761_762insCAGCAGCAGCAGCAGCAGCAGCAGCAGCAGCAGCAGCAGCA:c.620_621insCAGCAGCAGCAGCAGCAGCAGCAGCAGCAGCAGCAGCAGCA:c.704_705insCAGCAGCAGCAGCAGCAGCAGCAGCAGCAGCAGCAGCAGCA:c.749_750insCAGCAGCAGCAGCAGCAGCAGCAGCAGCAGCAGCAGCAGCA:c.869_870insCAGCAGCAGCAGCAGCAGCAGCAGCAGCAGCAGCAGCAGCA:c.914_915insCAGCAGCAG…	p.Q126Hfs*40:p.Q199Hfs*39:p.Q254Hfs*39:p.Q207Hfs*40:p.Q235Hfs*40:p.Q250Hfs*40:p.Q290Hfs*40:p.Q305Hfs*40:p.Q298Hfs*40:p.Q314Hfs*40:p.Q304Hfs*40
'ATXN3'	Recessive	14	92537355	92537355	-	TGCTGCTGCTGCTGCTGCTGCTGCTGCTGCTGCTGCTGCTGCTGCTGCTGCTGCTGCTGCTG	hom	c.377_378insCAGCAGCAGCAGCAGCAGCAGCAGCAGCAGCAGCAGCAGCAGCAGCAGCAGCAGCAGCAGCA:c.596_597insCAGCAGCAGCAGCAGCAGCAGCAGCAGCAGCAGCAGCAGCAGCAGCAGCAGCAGCAGCAGCA:c.761_762insCAGCAGCAGCAGCAGCAGCAGCAGCAGCAGCAGCAGCAGCAGCAGCAGCAGCAGCAGCAGCA:c.620_621insCAGCAGCAGCAGCAGCAGCAGCAGCAGCAGCAGCAGCAGCAGCAGCAGCAGCAGCAGCAGCA:c.704_705insCAGCAGCAGCAGCAGCAGCAGCAGCAGCAGCAGCAGCAGCAGCAGCAGCAGCAGCAGCAGCA:c.749_750insCAGCAGCAGCAG…	p.Q126Hfs*47:p.Q199Hfs*46:p.Q254Hfs*46:p.Q207Hfs*47:p.Q235Hfs*47:p.Q250Hfs*47:p.Q290Hfs*47:p.Q305Hfs*47:p.Q298Hfs*47:p.Q314Hfs*47:p.Q304Hfs*47
'ATXN7'	Compound-het-het	3	63898391	63898391	-	GCCGCAGCC	het	c.117_118insGCCGCAGCC	p.Q39_P40insAAA
'ATXN7L1'	Compound-het-het	7	105254237	105254237	G	C	het	c.C1524G:c.C1647G:c.C2172G	p.S508R:p.S549R:p.S724R
'ATXN7L1'	Compound-het-het	7	105254802	105254807	GAGGAG	-	het	c.954_959del:c.1077_1082del:c.1602_1607del:c.1974_1979del	p.S320_S321del:p.S361_S362del:p.S536_S537del:p.S660_S661del
'AVIL'	Compound-het-het	12	58201310	58201310	C	T	het	c.G29A	p.R10Q
'AVIL'	Compound-het-het	12	58204606	58204606	C	T	het	c.G551A:c.G530A	p.R184H:p.R177H
'AVIL'	Compound-het-het	12	58204891	58204891	C	T	het	c.G358A:c.G337A	p.A120T:p.A113T
'AWAT1'	Recessive	X	69454618	69454618	A	G	hom	c.A73G	p.I25V
'AX746755'	Compound-het-het	4	8358666	8358666	A	G	het	c.T424C	p.F142L
'AX746755'	Compound-het-het	4	8358672	8358676	AGGTG	-	het	c.414_418del	p.T139Lfs*161
'AX747187'	Compound-het-het	12	96986387	96986387	A	C	het	c.A3332C	p.K1111T
'AX747187'	Compound-het-het	12	97015375	97015375	G	A	het	c.G3647A	p.R1216H
'AX747287'	Compound-het-het	16	20499781	20499784	ACAT	-	het	c.240_243del	p.H81Qfs*28
'AX747287'	Compound-het-het	16	20499817	20499817	-	AGAGAGAGAG	het	c.276_277insAGAGAGAGAG	p.E93Rfs*19
'AX747325'	Compound-het-het	19	36036126	36036126	C	T	het	c.G266A	p.G89E
'AX747325'	Compound-het-het	19	36036126	36036126	C	T	het	c.G266A	p.G89E
'AX747619'	Compound-het-het	15	63340443	63340443	C	G	het	c.G730C	p.G244R
'AX747619'	Compound-het-het	15	63340989	63340989	C	T	het	c.G184A	p.G62R
'AX747879'	Compound-het-het	5	179078891	179078891	T	C	het	c.T374C	p.L125P
'AX747879'	Compound-het-het	5	179079372	179079372	C	T	het	c.C488T	p.T163I
'AX747985'	Compound-het-het	5	178951506	178951506	A	G	het	c.A28G	p.I10V
'AX747985'	Compound-het-het	5	178951717	178951717	A	G	het	c.A239G	p.H80R
'AX747985'	Compound-het-het	5	178951618	178951618	C	T	het	c.C140T	p.P47L
'AX747985'	Compound-het-het	5	178951831	178951831	G	A	het	c.G353A	p.R118H
'AX747985'	Compound-het-het	5	178951618	178951618	C	T	het	c.C140T	p.P47L
'AX747985'	Compound-het-het	5	178951831	178951831	G	A	het	c.G353A	p.R118H
'AX747988'	Recessive	1	16862454	16862454	T	G	hom	c.T175G	p.S59A
'AX747988'	Recessive	1	16862454	16862454	T	G	hom	c.T175G	p.S59A
'AX748285'	Compound-het-het	10	1136286	1136286	G	A	het	c.G166A	p.V56M
'AX748285'	Compound-het-het	10	1136419	1136419	-	C	het	c.299_300insC	p.*100delinsYS*
'AX748309'	Compound-het-het	9	35649970	35649970	C	T	het	c.G466A	p.E156K
'AX748309'	Compound-het-het	9	35650162	35650162	C	T	het	c.G139A	p.E47K
'AX748309'	Compound-het-het	9	35649970	35649970	C	T	het	c.G466A	p.E156K
'AX748309'	Compound-het-het	9	35650162	35650162	C	T	het	c.G139A	p.E47K
'AXDND1'	Recessive	1	179457770	179457777	CTTTCTTT	-	hom	c.29_36del	p.E10Gfs*14
'AXDND1'	Recessive	1	179457770	179457772	CTT	-	hom	c.34_36del	p.K12del
'AXDND1'	Recessive	1	179457770	179457772	CTT	-	hom	c.34_36del	p.K12del
'AXDND1'	Compound-het-het	1	179452274	179452274	C	T	het	c.C1811T:c.C2009T	p.A604V:p.A670V
'AXDND1'	Compound-het-het	1	179457775	179457792	TTTCTTTCTTTCTTTCTT	-	het	c.14_31del	p.K5_E10del
'AXDND1'	Recessive	1	179457770	179457780	CTTTCTTTCTT	-	hom	c.26_36del	p.K9Rfs*14
'AXDND1'	Recessive	1	179457770	179457770	-	TTTT	hom	c.35_36insAAAA	p.E13Kfs*15
'AXDND1'	Recessive	1	179457766	179457796	TCTCCTTTCTTTCTTTCTTTCTTTCTTTCTT	-	hom	c.10_40del	p.K4Efs*25
'AXDND1'	Recessive	1	179457770	179457770	-	TTTT	hom	c.35_36insAAAA	p.E13Kfs*15
'AXDND1'	Recessive	1	179457773	179457773	-	TCTTTCTTTCTTTC	hom	c.32_33insGAAAGAAAGAAAGA	p.E15Kfs*29
'AXDND1'	Recessive	1	179457770	179457770	-	TTTT	hom	c.35_36insAAAA	p.E13Kfs*15
'AXDND1'	Compound-het-het	1	179354431	179354431	A	G	het	c.A602G:c.A800G	p.H201R:p.H267R
'AXDND1'	Compound-het-het	1	179457770	179457784	CTTTCTTTCTTTCTT	-	het	c.22_36del	p.K8_K12del
'AXDND1'	Compound-het-het	1	179457766	179457784	TCTCCTTTCTTTCTTTCTT	-	het	c.22_40del	p.K8Efs*25
'AXDND1'	Recessive	1	179457770	179457780	CTTTCTTTCTT	-	hom	c.26_36del	p.K9Rfs*14
'AXDND1'	Recessive	1	179457770	179457780	CTTTCTTTCTT	-	hom	c.26_36del	p.K9Rfs*14
'AXIN2'	Compound-het-het	17	63532594	63532594	A	G	het	c.T1790C:c.T1985C	p.L597P:p.L662P
'AXIN2'	Compound-het-het	17	63533016	63533016	A	T	het	c.T1878A	p.S626R
'AXIN2'	Compound-het-het	17	63532594	63532594	A	G	het	c.T1790C:c.T1985C	p.L597P:p.L662P
'AXIN2'	Compound-het-het	17	63533016	63533016	A	T	het	c.T1878A	p.S626R
'AXIN2'	Compound-het-het	17	63530153	63530153	G	T	het	c.C2087A:c.C2282A	p.A696D:p.A761D
'AZI1'	Compound-het-het	17	79165016	79165016	C	G	het	c.G1074C:c.G2634C:c.G2643C:c.G2751C:c.G2742C	p.E358D:p.E878D:p.E881D:p.E917D:p.E914D
'AZI1'	Compound-het-het	17	79165016	79165016	C	G	het	c.G1074C:c.G2634C:c.G2643C:c.G2751C:c.G2742C	p.E358D:p.E878D:p.E881D:p.E917D:p.E914D
'AZI1'	Compound-het-het	17	79165016	79165016	C	G	het	c.G1074C:c.G2634C:c.G2643C:c.G2751C:c.G2742C	p.E358D:p.E878D:p.E881D:p.E917D:p.E914D
'AZI1'	Compound-het-het	17	79182738	79182738	C	T	het	c.G262A	p.G88S
'B4GALT4'	Compound-het-het	3	118931401	118931401	C	A	het	c.G1030T	p.A344S
'BABAM2'	Recessive	2	28117455	28117455	C	G	hom	c.C32G	p.S11C
'BAG3'	Compound-het-het	10	121429369	121429369	C	G	het	c.C187G:c.C13G	p.P63A:p.P5A
'BAG3'	Compound-het-het	10	121436204	121436204	C	T	het	c.C1138T:c.C961T	p.P380S:p.P321S
'BAIAP2'	Compound-het-het	17	79010758	79010758	-	G	het	c.150dupG	p.T52Dfs*9
'BBS9'	Compound-het-het	7	33397476	33397476	G	A	het	c.G1442A:c.G1457A:c.G1547A:c.G1562A	p.R481Q:p.R486Q:p.R516Q:p.R521Q
'BBS9'	Compound-het-het	7	33545175	33545175	C	T	het	c.C2096T:c.C2111T:c.C2201T:c.C2216T	p.A699V:p.A704V:p.A734V:p.A739V
'BC014150'	Compound-het-het	21	32931855	32931855	C	-	het	c.282delC	p.D94Efs*4
'BC014150'	Compound-het-het	21	32932392	32932392	A	G	het	c.A398G	p.H133R
'BC031638'	Compound-het-het	21	47743976	47743976	C	T	het	c.G229A	p.V77I
'BC031638'	Compound-het-het	21	47744083	47744083	C	A	het	c.G122T	p.R41L
'BC031638'	Compound-het-het	21	47743976	47743976	C	T	het	c.G229A	p.V77I
'BC031638'	Compound-het-het	21	47744083	47744083	C	A	het	c.G122T	p.R41L
'BC033961'	Compound-het-het	12	57979235	57979235	T	G	het	c.T305G	p.L102R
'BC033961'	Compound-het-het	12	57979249	57979249	G	T	het	c.G319T	p.D107Y
'BC033961'	Compound-het-het	12	57979250	57979250	A	T	het	c.A320T	p.D107V
'BC038729'	Compound-het-het	7	3180566	3180566	T	C	het	c.A68G	p.E23G
'BC042649'	Compound-het-het	12	131781110	131781110	G	A	het	c.G170A	p.R57Q
'BC042649'	Compound-het-het	12	131781121	131781121	-	G	het	c.181dupG	p.S63Qfs*2
'BC042649'	Compound-het-het	12	131781319	131781319	A	C	het	c.A379C	p.M127L
'BC042649'	Compound-het-het	12	131781520	131781520	C	T	het	c.C580T	p.P194S
'BC046483'	Compound-het-het	10	1095371	1095371	G	A	het	c.G49A	p.G17R
'BC046483'	Compound-het-het	10	1095402	1095402	C	T	het	c.C80T	p.T27I
'BC046483'	Compound-het-het	10	1095408	1095408	C	G	het	c.C86G	p.P29R
'BC046483'	Compound-het-het	10	1095412	1095412	T	-	het	c.90delT	p.R34Efs*19
'BC047626'	Compound-het-het	6	148051302	148051302	C	T	het	c.G59A	p.R20Q
'BC047626'	Compound-het-het	6	148058465	148058465	C	T	het	c.C175T	p.R59C
'BC049386'	Compound-het-het	21	35772046	35772046	G	A	het	c.G50A	p.R17Q
'BC049386'	Compound-het-het	21	35791612	35791612	A	G	het	c.T324C	p.S108S
'BC101079'	Compound-het-het	15	102284729	102284729	C	A	het	c.G47T	p.W16L
'BC101079'	Compound-het-het	15	102284729	102284729	C	A	het	c.G47T	p.W16L
'BC101079'	Recessive	15	102294677	102294677	A	G	hom	c.A505G	p.K169E
'BC101234'	Compound-het-het	2	242946150	242946150	G	A	het	c.G151A	p.G51R
'BC101234'	Compound-het-het	2	242946175	242946175	-	TAAA	het	c.176_177insTAAA	p.G60Kfs*142
'BC148262'	Compound-het-het	14	28142327	28142327	C	T	het	uc010amc.2:c.G49A	p.V17I
'BC153822'	Compound-het-het	14	23573861	23573861	C	T	het	c.G269A	p.R90Q
'BCAR1'	Compound-het-het	16	75300646	75300646	T	C	het	c.A32G	p.Q11R
'BCAR1'	Compound-het-het	16	75300646	75300646	T	C	het	c.A32G	p.Q11R
'BCAR1'	Compound-het-het	16	75269377	75269377	C	T	het	c.G1420A:c.G1474A:c.G1414A:c.G1333A:c.G1558A:c.G976A	p.V474I:p.V492I:p.V472I:p.V445I:p.V520I:p.V326I
'BCAR1'	Compound-het-het	16	75300646	75300646	T	C	het	c.A32G	p.Q11R
'BCAR1'	Compound-het-het	16	75300646	75300646	T	C	het	c.A32G	p.Q11R
'BCAS1'	Compound-het-het	20	52645142	52645142	G	A	het	c.C98T:c.C221T:c.C512T	p.T33M:p.T74M:p.T171M
'BCAS1'	Compound-het-het	20	52645454	52645454	G	A	het	c.C200T	p.T67M
'BCAS1'	Compound-het-het	20	52645142	52645142	G	A	het	c.C98T:c.C221T:c.C512T	p.T33M:p.T74M:p.T171M
'BCAS1'	Compound-het-het	20	52645454	52645454	G	A	het	c.C200T	p.T67M
'BCAS4'	Compound-het-het	20	49458414	49458414	G	A	het	c.G466A:c.G376A	p.A156T:p.A126T
'BCL2L11'	Compound-het-het	2	111886246	111886246	G	A	het	c.G257A	p.G86E
'BCL2L11'	Compound-het-het	2	111887732	111887732	A	C	het	c.A148C	p.S50R
'BCL2L14'	Compound-het-het	12	12247694	12247694	C	A	het	c.C775A:c.C874A	p.P259T:p.P292T
'BCL6B'	Recessive	17	6928020	6928020	-	CAGCAGCAG	hom	c.702_703insCAGCAGCAG	p.S234_S235insQQQ
'BCL7B'	Compound-het-het	7	72967968	72967968	A	C	het	c.T35G	p.V12G
'BCLAF1'	Compound-het-het	6	136596776	136596776	C	G	het	c.G1740C:c.G1746C:c.G1227C:c.G1221C	p.E580D:p.E582D:p.E409D:p.E407D
'BCO2'	Compound-het-het	11	112085566	112085566	C	T	het	c.C1195T:c.C1099T:c.C1414T:c.C1312T	p.R399X:p.R367X:p.R472X:p.R438X
'BCORL1'	Recessive	X	129147088	129147088	C	T	hom	c.C340T	p.P114S
'BCORL1'	Recessive	X	129147088	129147088	C	T	hom	c.C340T	p.P114S
'BCR'	Compound-het-het	22	23523494	23523494	G	T	het	c.G347T	p.R116L
'BCRP3'	Compound-het-het	22	25042988	25042988	G	A	het	c.G361A	p.A121T
'BCRP3'	Compound-het-het	22	25042988	25042988	G	A	het	c.G361A	p.A121T
'BCRP3'	Compound-het-het	22	25047055	25047055	T	G	het	c.A4C	p.N2H
'BCRP3'	Compound-het-het	22	25047055	25047055	T	G	het	c.A4C	p.N2H
'BEST3'	Compound-het-het	12	70087647	70087650	CTGG	-	het	c.285_288del	p.Q96Lfs*2
'BEST3'	Compound-het-het	12	70087653	70087656	CCAC	-	het	c.279_282del	p.W93*
'BEST3'	Compound-het-het	12	70065243	70065252	GCAGTAGTCA	-	het	c.417_426del:c.738_747del:c.1056_1065del	p.D140Yfs*36:p.D140Yfs*26:p.D247Yfs*36:p.D353Yfs*36:p.D353Yfs*25
'BEST3'	Compound-het-het	12	70065333	70065333	-	CATTTCGTC	het	c.424_425insGACGAAATG	p.C142_T143del
'BET1L'	Recessive	11	169007	169007	T	A	hom	c.A410T	p.H137L
'BEX1'	Recessive	X	102318174	102318174	T	C	hom	c.A29G	p.N10S
'BEX1'	Recessive	X	102318174	102318174	T	C	hom	c.A29G	p.N10S
'BICDL2'	Compound-het-het	16	3081129	3081129	T	C	het	c.A305G	p.E102G
'BICDL2'	Compound-het-het	16	3085397	3085397	C	T	het	c.G101A	p.R34Q
'BICDL2'	Compound-het-het	16	3081129	3081129	T	C	het	c.A305G	p.E102G
'BICDL2'	Compound-het-het	16	3085397	3085397	C	T	het	c.G101A	p.R34Q
'BICRAL'	Compound-het-het	6	42832939	42832939	C	T	het	c.C2995T	p.P999S
'BICRAL'	Compound-het-het	6	42832979	42832979	A	G	het	c.A3035G	p.K1012R
'BIN1'	Compound-het-het	2	127659534	127659534	G	A	het	c.G340A	p.D114N
'BIRC5'	Compound-het-het	17	76219646	76219646	C	T	het	c.C322T:c.G634A	p.R108W:p.G212S
'BIRC5'	Compound-het-het	17	76220609	76220609	G	A	het	c.C128T	p.A43V
'BIVM-ERCC5'	Compound-het-het	13	103514758	103514758	G	A	het	c.G1259A	p.R420H
'BIVM-ERCC5'	Compound-het-het	13	103515210	103515210	C	T	het	c.C1711T	p.P571S
'BIVM-ERCC5'	Compound-het-het	13	103527931	103527931	G	A	het	c.G938A:c.G3239A	p.G313E:p.G1080E
'BMP10'	Compound-het-het	2	69093413	69093413	G	A	het	c.C625T	p.R209C
'BMP10'	Compound-het-het	2	69098385	69098385	T	C	het	c.A106G	p.M36V
'BMP2K'	Compound-het-het	4	79833182	79833182	C	T	het	c.C3481T	p.Q1161X
'BMP2K'	Compound-het-het	4	79833182	79833182	C	T	het	c.C3481T	p.Q1161X
'BMS1'	Compound-het-het	10	43292451	43292451	G	C	het	c.G1759C	p.V587L
'BMS1P20'	Compound-het-het	22	22682057	22682057	C	G	het	c.C239G	p.P80R
'BMS1P20'	Compound-het-het	22	22698031	22698031	G	A	het	c.G319A	p.E107K
'BMS1P20'	Compound-het-het	22	22749576	22749576	G	A	het	c.G100A	p.G34R
'BMS1P20'	Compound-het-het	22	22749644	22749644	G	A	het	c.G168A	p.W56X
'BRCA2'	Compound-het-het	13	32929007	32929007	G	C	het	c.G7017C	p.K2339N
'BRCA2'	Compound-het-het	13	32972380	32972380	G	A	het	c.G9730A	p.V3244I
'BRCA2'	Compound-het-het	13	32929007	32929007	G	C	het	c.G7017C	p.K2339N
'BRCA2'	Compound-het-het	13	32972380	32972380	G	A	het	c.G9730A	p.V3244I
'BRCA2'	Compound-het-het	13	32914815	32914815	G	A	het	c.G6323A	p.R2108H
'BRCA2'	Compound-het-het	13	32929007	32929007	G	C	het	c.G7017C	p.K2339N
'BRCA2'	Compound-het-het	13	32972380	32972380	G	A	het	c.G9730A	p.V3244I
'BRCA2'	Compound-het-het	13	32913173	32913173	C	A	het	c.C4681A	p.H1561N
'BRCA2'	Compound-het-het	13	32914904	32914904	G	T	het	c.G6412T	p.V2138F
'BRCA2'	Compound-het-het	13	32912361	32912361	G	A	het	c.G3869A	p.C1290Y
'BRCA2'	Compound-het-het	13	32914712	32914712	C	A	het	c.C6220A	p.H2074N
'BRE'	Recessive	2	28117455	28117455	C	G	hom	c.C32G	p.S11C
'BRF1'	Compound-het-het	14	105688189	105688189	C	T	het	c.G271A:c.G397A:c.G499A:c.G1030A:c.G766A:c.G1111A	p.E91K:p.E133K:p.E167K:p.E344K:p.E256K:p.E371K
'BRF1'	Compound-het-het	14	105722782	105722782	C	T	het	c.G544A	p.G182R
'BSN'	Compound-het-het	3	49691545	49691545	G	A	het	c.G4556A	p.R1519Q
'BSN'	Compound-het-het	3	49692012	49692012	A	G	het	c.A5023G	p.T1675A
'BSN'	Compound-het-het	3	49694230	49694230	G	A	het	c.G7241A	p.R2414Q
'BSN'	Compound-het-het	3	49691545	49691545	G	A	het	c.G4556A	p.R1519Q
'BSN'	Compound-het-het	3	49692012	49692012	A	G	het	c.A5023G	p.T1675A
'BSN'	Compound-het-het	3	49694230	49694230	G	A	het	c.G7241A	p.R2414Q
'BTBD1'	Compound-het-het	15	83710606	83710606	G	A	het	c.C736T	p.R246C
'BTBD8'	Compound-het-het	1	92546231	92546231	C	T	het	c.C103T	p.R35W
'BTBD8'	Compound-het-het	1	92647250	92647250	C	T	het	c.C2696T:c.C2861T	p.T899M:p.T954M
'BTBD8'	Compound-het-het	1	92540347	92540347	C	-	het	c.652delG	p.D218Ifs*10
'BTBD8'	Compound-het-het	1	92633418	92633418	G	A	het	c.G5A:c.G170A	p.S2N:p.S57N
'BTBD8'	Compound-het-het	1	92642962	92642962	A	G	het	c.A898G:c.A1063G	p.I300V:p.I355V
'BTBD8'	Compound-het-het	1	92646793	92646793	A	G	het	c.A2239G:c.A2404G	p.M747V:p.M802V
'BTNL10'	Compound-het-het	1	228698143	228698143	G	A	het	c.C544T	p.P182S
'BTNL10'	Compound-het-het	1	228699619	228699619	G	A	het	c.C40T	p.P14S
'BX649567.1'	Recessive	9	67925135	67925135	A	G	hom	c.T76C	p.C26R
'BZRAP1'	Compound-het-het	17	56389516	56389516	C	T	het	c.G2486A:c.G2666A	p.R829Q:p.R889Q
'BZRAP1'	Compound-het-het	17	56389823	56389823	C	T	het	c.G2179A:c.G2359A	p.E727K:p.E787K
'BZRAP1'	Compound-het-het	17	56382557	56382558	TG	-	het	c.98_99del	p.S33Cfs*29
'BZRAP1'	Compound-het-het	17	56386231	56386231	C	T	het	c.G4222A:c.G4402A	p.G1408S:p.G1468S
'BZRAP1'	Compound-het-het	17	56382557	56382558	TG	-	het	c.98_99del	p.S33Cfs*29
'BZRAP1'	Compound-het-het	17	56386231	56386231	C	T	het	c.G4222A:c.G4402A	p.G1408S:p.G1468S
'C10ORF112'	Compound-het-het	10	19546697	19546697	C	A	het	c.C964A:c.C1003A	p.P322T:p.P335T
'C10ORF112'	Compound-het-het	10	19678425	19678425	G	A	het	c.G421A:c.G2800A:c.G2839A	p.D141N:p.D934N:p.D947N
'C10ORF112'	Compound-het-het	10	19546697	19546697	C	A	het	c.C964A:c.C1003A	p.P322T:p.P335T
'C10ORF112'	Compound-het-het	10	19678425	19678425	G	A	het	c.G421A:c.G2800A:c.G2839A	p.D141N:p.D934N:p.D947N
'C10ORF112'	Compound-het-het	10	19636924	19636924	A	T	het	c.A2014T:c.A2053T	p.S672C:p.S685C
'C10ORF112'	Compound-het-het	10	19454734	19454734	T	C	het	c.T1825C	p.F609L
'C10ORF112'	Compound-het-het	10	19636924	19636924	A	T	het	c.A2014T:c.A2053T	p.S672C:p.S685C
'C10ORF112'	Compound-het-het	10	19435154	19435154	C	G	het	c.C1439G	p.S480W
'C10ORF112'	Compound-het-het	10	19498313	19498313	A	G	het	c.A583G:c.A622G	p.M195V:p.M208V
'C10ORF12'	Compound-het-het	10	98744793	98744793	A	G	het	c.A3646G	p.T1216A
'C10ORF12'	Compound-het-het	10	98744793	98744793	A	G	het	c.A3646G	p.T1216A
'C10ORF71'	Compound-het-het	10	50533054	50533054	T	G	het	c.T2464G	p.F822V
'C10ORF95'	Compound-het-het	10	104210509	104210509	C	T	het	c.G479A	p.R160K
'C10ORF95'	Compound-het-het	10	104210834	104210834	C	T	het	c.G154A	p.G52S
'C10ORF95'	Compound-het-het	10	104210509	104210509	C	T	het	c.G479A	p.R160K
'C10ORF95'	Compound-het-het	10	104210834	104210834	C	T	het	c.G154A	p.G52S
'C11ORF24'	Compound-het-het	11	68029381	68029381	G	A	het	c.C1082T	p.T361I
'C11ORF24'	Compound-het-het	11	68030272	68030272	G	A	het	c.C191T	p.T64I
'C11ORF24'	Compound-het-het	11	68029381	68029381	G	A	het	c.C1082T	p.T361I
'C11ORF24'	Compound-het-het	11	68030272	68030272	G	A	het	c.C191T	p.T64I
'C11ORF24'	Compound-het-het	11	68029381	68029381	G	A	het	c.C1082T	p.T361I
'C11ORF24'	Compound-het-het	11	68030272	68030272	G	A	het	c.C191T	p.T64I
'C11ORF24'	Compound-het-het	11	68029786	68029786	G	A	het	c.C677T	p.P226L
'C11ORF24'	Compound-het-het	11	68029381	68029381	G	A	het	c.C1082T	p.T361I
'C11ORF24'	Compound-het-het	11	68030272	68030272	G	A	het	c.C191T	p.T64I
'C11ORF35'	Recessive	11	556048	556048	G	A	hom	c.C1325T	p.P442L
'C11ORF65'	Compound-het-het	11	108277642	108277647	TAGGTC	-	het	c.125_130del:c.218_223del:c.272_277del	p.R42_P43del:p.R73_P74del:p.R91_P92del
'C11ORF65'	Compound-het-het	11	108277655	108277655	A	-	het	c.117delT:c.210delT:c.264delT	p.F39Lfs*45:p.F70Lfs*45:p.F88Lfs*45
'C11ORF80'	Compound-het-het	11	66581457	66581457	T	C	het	c.T509C:c.T665C:c.T695C:c.T698C:c.T1160C:c.T506C	p.I170T:p.I222T:p.I232T:p.I233T:p.I387T:p.I169T
'C11ORF80'	Compound-het-het	11	66581457	66581457	T	C	het	c.T509C:c.T665C:c.T695C:c.T698C:c.T1160C:c.T506C	p.I170T:p.I222T:p.I232T:p.I233T:p.I387T:p.I169T
'C12ORF36'	Compound-het-het	12	13527830	13527830	C	T	het	c.G293A	p.R98Q
'C12ORF36'	Compound-het-het	12	13527918	13527918	C	G	het	c.G205C	p.V69L
'C12ORF40'	Compound-het-het	12	40076457	40076457	T	C	het	c.T500C:c.T731C	p.M167T:p.M244T
'C12ORF40'	Compound-het-het	12	40076931	40076931	C	G	het	c.C974G:c.C1205G	p.S325C:p.S402C
'C12ORF42'	Compound-het-het	12	103695960	103695960	-	G	het	c.1008dupC:c.807dupC	p.R337Pfs*16:p.R270Pfs*16
'C12ORF55'	Compound-het-het	12	96986387	96986387	A	C	het	c.A3332C	p.K1111T
'C12ORF55'	Compound-het-het	12	97015375	97015375	G	A	het	c.G3647A	p.R1216H
'C12ORF77'	Compound-het-het	12	25188629	25188629	T	C	het	c.T1759C	p.S587P
'C13ORF45'	Compound-het-het	13	76447821	76447833	TGGAAGTGCGGTG	-	het	c.146_158del	p.L49Rfs*3
'C14ORF119'	Compound-het-het	14	23573861	23573861	C	T	het	c.G269A	p.R90Q
'C14ORF180'	Compound-het-het	14	105055139	105055139	C	T	het	c.C458T	p.T153M
'C14ORF180'	Compound-het-het	14	105055171	105055171	C	T	het	c.C490T	p.R164W
'C14ORF180'	Compound-het-het	14	105055139	105055139	C	T	het	c.C458T	p.T153M
'C14ORF180'	Compound-het-het	14	105055171	105055171	C	T	het	c.C490T	p.R164W
'C14ORF39'	Compound-het-het	14	60903706	60903706	T	C	het	c.A1621G	p.T541A
'C14ORF39'	Compound-het-het	14	60932724	60932724	G	T	het	c.C945A	p.D315E
'C14ORF39'	Compound-het-het	14	60933647	60933647	G	A	het	c.C883T	p.P295S
'C14ORF80'	Compound-het-het	14	105958957	105958957	G	A	het	c.G348A:c.G471A:c.G93A:c.G354A	p.M116I:p.M157I:p.M31I:p.M118I
'C16ORF47'	Compound-het-het	16	73164891	73164891	C	G	het	c.G133C	p.G45R
'C16ORF47'	Compound-het-het	16	73164906	73164906	T	C	het	c.A118G	p.S40G
'C16ORF62'	Compound-het-het	16	19584549	19584549	G	A	het	c.G394A:c.G661A:c.G169A	p.E132K:p.E221K:p.E57K
'C16ORF62'	Compound-het-het	16	19659155	19659155	C	T	het	c.C1226T:c.C1529T:c.C1778T:c.C2045T:c.C1979T:c.C2246T	p.S409F:p.S510F:p.S593F:p.S682F:p.S660F:p.S749F
'C16ORF62'	Compound-het-het	16	19663337	19663337	G	A	het	c.G1393A:c.G1696A:c.G1867A:c.G2134A:c.G2146A:c.G2413A	p.A465T:p.A566T:p.A623T:p.A712T:p.A716T:p.A805T
'C16ORF62'	Compound-het-het	16	19663326	19663326	T	C	het	c.T1382C:c.T1685C:c.T1856C:c.T2123C:c.T2135C:c.T2402C	p.I461T:p.I562T:p.I619T:p.I708T:p.I712T:p.I801T
'C16ORF71'	Compound-het-het	16	4787973	4787973	G	A	het	c.G302A	p.R101H
'C16ORF71'	Compound-het-het	16	4796417	4796417	C	T	het	c.C1085T:c.C1127T	p.P362L:p.P376L
'C16ORF78'	Compound-het-het	16	49412421	49412421	G	A	het	c.G311A	p.R104Q
'C16ORF78'	Compound-het-het	16	49430454	49430465	CCTTCATAAGAG	-	het	c.515_526del	p.T172_D176delinsN
'C16ORF82'	Compound-het-het	16	27078632	27078632	C	A	het	c.C316A	p.H106N
'C16ORF82'	Compound-het-het	16	27078632	27078632	C	A	het	c.C316A	p.H106N
'C16ORF91'	Recessive	16	1470497	1470497	A	G	hom	c.T149C:c.T620C	p.I50T:p.I207T
'C17ORF70'	Compound-het-het	17	79516352	79516352	C	T	het	c.G830A:c.G1283A	p.R277H:p.R428H
'C17ORF70'	Compound-het-het	17	79519275	79519275	C	G	het	c.G82C	p.V28L
'C17ORF72'	Compound-het-het	17	62079648	62079648	C	T	het	c.C182T	p.P61L
'C17ORF72'	Compound-het-het	17	62079657	62079657	G	A	het	c.G191A	p.S64N
'C17ORF72'	Compound-het-het	17	62079793	62079793	T	G	het	c.T327G	p.S109R
'C17ORF74'	Compound-het-het	17	7329361	7329361	C	T	het	c.C188T	p.T63I
'C17ORF74'	Compound-het-het	17	7334967	7334967	A	G	het	c.A2378G:c.A2477G	p.Q793R:p.Q826R
'C17ORF74'	Compound-het-het	17	7335408	7335408	A	G	het	c.A2819G:c.A2918G	p.K940R:p.K973R
'C17ORF85'	Compound-het-het	17	3721704	3721704	G	A	het	c.C1163T:c.C323T	p.A388V:p.A108V
'C17ORF85'	Compound-het-het	17	3721821	3721826	TCCTCT	-	het	c.1041_1046del:c.201_206del	p.E358_E359del:p.E78_E79del
'C17ORF96'	Compound-het-het	17	36830423	36830423	T	A	het	c.A326T	p.D109V
'C17ORF96'	Compound-het-het	17	36830431	36830431	C	A	het	c.G318T	p.E106D
'C17ORF96'	Compound-het-het	17	36830423	36830423	T	A	het	c.A326T	p.D109V
'C17ORF96'	Compound-het-het	17	36830431	36830431	C	A	het	c.G318T	p.E106D
'C18ORF54'	Compound-het-het	18	51887052	51887052	C	T	het	c.C110T	p.S37L
'C18ORF54'	Compound-het-het	18	51888415	51888415	C	T	het	c.C686T	p.S229L
'C18ORF54'	Compound-het-het	18	51887052	51887052	C	T	het	c.C110T	p.S37L
'C18ORF54'	Compound-het-het	18	51888415	51888415	C	T	het	c.C686T	p.S229L
'C18ORF8'	Compound-het-het	18	21089596	21089596	G	A	het	c.G436A	p.G146S
'C19ORF26'	Compound-het-het	19	1229257	1229257	G	A	het	c.C2099T	p.P700L
'C19ORF26'	Compound-het-het	19	1234617	1234617	T	G	het	c.A562C:c.A640C:c.A580C	p.T188P:p.T214P:p.T194P
'C19ORF45'	Compound-het-het	19	7571094	7571094	-	AT	het	c.266_267insAT	p.E90Wfs*44
'C19ORF45'	Compound-het-het	19	7571096	7571097	GA	-	het	c.268_269del	p.E90Sfs*62
'C19ORF53'	Compound-het-het	19	13885348	13885348	A	C	het	c.A56C:c.A17C	p.Q19P:p.Q6P
'C19ORF55'	Compound-het-het	19	36257805	36257805	C	G	het	c.C906G:c.C870G	p.S302R:p.S290R
'C19ORF55'	Compound-het-het	19	36258592	36258592	C	T	het	c.C1577T	p.P526L
'C19ORF55'	Compound-het-het	19	36257805	36257805	C	G	het	c.C906G:c.C870G	p.S302R:p.S290R
'C19ORF55'	Compound-het-het	19	36258592	36258592	C	T	het	c.C1577T	p.P526L
'C19ORF55'	Recessive	19	36258061	36258061	C	T	hom	c.C1046T	p.P349L
'C1ORF116'	Compound-het-het	1	207196598	207196598	C	T	het	c.G511A	p.E171K
'C1ORF116'	Compound-het-het	1	207196760	207196760	A	G	het	c.T349C	p.S117P
'C1ORF147'	Compound-het-het	1	206666203	206666203	C	T	het	c.G331A	p.A111T
'C1ORF147'	Compound-het-het	1	206666281	206666281	C	T	het	c.G253A	p.G85R
'C1ORF147'	Compound-het-het	1	206666203	206666203	C	T	het	c.G331A	p.A111T
'C1ORF147'	Compound-het-het	1	206666281	206666281	C	T	het	c.G253A	p.G85R
'C1ORF168'	Compound-het-het	1	57284960	57284960	C	G	het	c.G4C	p.E2Q
'C1ORF170'	Compound-het-het	1	916159	916159	G	T	het	c.C251A	p.P84Q
'C1ORF170'	Compound-het-het	1	916534	916534	C	T	het	c.G13A:c.G73A	p.G5S:p.G25S
'C1ORF173'	Compound-het-het	1	75038648	75038648	G	A	het	c.C2746T	p.L916F
'C1ORF173'	Compound-het-het	1	75038836	75038836	T	A	het	c.A2558T	p.E853V
'C1ORF173'	Compound-het-het	1	75072425	75072425	G	T	het	c.C758A:c.C1349A	p.T253N:p.T450N
'C1ORF173'	Compound-het-het	1	75072309	75072309	C	T	het	c.G874A:c.G1465A	p.D292N:p.D489N
'C1ORF173'	Compound-het-het	1	75055749	75055749	G	A	het	c.C1151T:c.C1742T	p.S384L:p.S581L
'C1ORF173'	Compound-het-het	1	75065422	75065422	C	G	het	c.G1092C:c.G1683C	p.E364D:p.E561D
'C1ORF65'	Compound-het-het	1	223568225	223568225	C	T	het	c.C1408T	p.R470W
'C1ORF65'	Compound-het-het	1	223712821	223712821	T	C	het	c.A137G	p.D46G
'C1ORF86'	Compound-het-het	1	2129458	2129458	G	T	het	c.C359A	p.T120K
'C1ORF86'	Compound-het-het	1	2129458	2129458	G	T	het	c.C359A	p.T120K
'C1ORF86'	Compound-het-het	1	2130234	2130234	C	T	het	c.G194A	p.R65H
'C1ORF86'	Compound-het-het	1	2130276	2130276	C	T	het	c.G152A	p.R51Q
'C1QTNF2'	Compound-het-het	5	159776372	159776372	G	A	het	c.C796T	p.R266W
'C1QTNF2'	Compound-het-het	5	159776776	159776776	C	T	het	c.G392A	p.R131Q
'C21ORF33'	Compound-het-het	21	45560949	45560949	A	G	het	c.A647G	p.H216R
'C21ORF33'	Compound-het-het	21	45588146	45588146	C	A	het	c.G293T	p.R98L
'C21ORF58'	Compound-het-het	21	47743976	47743976	C	T	het	c.G229A	p.V77I
'C21ORF58'	Compound-het-het	21	47743976	47743976	C	T	het	c.G229A	p.V77I
'C22ORF34'	Compound-het-het	22	50014264	50014264	G	A	het	c.C488T	p.A163V
'C22ORF34'	Compound-het-het	22	50017988	50017988	G	A	het	c.C143T:c.C473T	p.S48F:p.S158F
'C2CD2L'	Compound-het-het	11	118982046	118982046	G	A	het	c.G116A:c.G872A	p.R39Q:p.R291Q
'C2CD3'	Compound-het-het	11	73789726	73789726	T	G	het	c.A305C:c.A461C:c.A4037C	p.D102A:p.D154A:p.D1346A
'C2CD3'	Compound-het-het	11	73796827	73796827	C	T	het	c.G14A:c.G170A:c.G3746A	p.R5Q:p.R57Q:p.R1249Q
'C2CD3'	Compound-het-het	11	73789726	73789726	T	G	het	c.A305C:c.A461C:c.A4037C	p.D102A:p.D154A:p.D1346A
'C2CD3'	Compound-het-het	11	73796827	73796827	C	T	het	c.G14A:c.G170A:c.G3746A	p.R5Q:p.R57Q:p.R1249Q
'C2CD3'	Compound-het-het	11	73760502	73760502	G	C	het	c.C1509G:c.C1665G:c.C5241G	p.I503M:p.I555M:p.I1747M
'C2CD3'	Compound-het-het	11	73789726	73789726	T	G	het	c.A305C:c.A461C:c.A4037C	p.D102A:p.D154A:p.D1346A
'C2CD3'	Compound-het-het	11	73789633	73789633	C	T	het	c.G398A:c.G554A:c.G4130A	p.R133Q:p.R185Q:p.R1377Q
'C2CD3'	Compound-het-het	11	73850719	73850719	C	T	het	c.G638A	p.R213H
'C2CD4D'	Compound-het-het	1	151810910	151810910	G	T	het	c.C556A	p.R186S
'C2CD4D'	Compound-het-het	1	151811023	151811023	G	A	het	c.C443T	p.S148L
'C2CD6'	Compound-het-het	2	202356487	202356487	G	A	het	c.C4577T	p.S1526F
'C2CD6'	Compound-het-het	2	202400987	202400987	G	T	het	c.C1263A	p.D421E
'C2CD6'	Compound-het-het	2	202356487	202356487	G	A	het	c.C4577T	p.S1526F
'C2CD6'	Compound-het-het	2	202400987	202400987	G	T	het	c.C1263A	p.D421E
'C2ORF16'	Compound-het-het	2	27804663	27804686	CATCACAGTCCCTCTGAGAGAAGA	-	het	c.5224_5247del	p.R1749_R1756del
'C2ORF16'	Compound-het-het	2	27804787	27804787	A	G	het	c.A5348G	p.H1783R
'C2ORF16'	Compound-het-het	2	27804802	27804802	A	G	het	c.A5363G	p.K1788R
'C2ORF43'	Compound-het-het	2	20886706	20886706	T	C	het	c.A545G:c.A791G:c.A935G	p.D182G:p.D264G:p.D312G
'C2ORF43'	Compound-het-het	2	20990122	20990122	G	A	het	c.C191T:c.C209T	p.A64V:p.A70V
'C2ORF54'	Compound-het-het	2	241889808	241889808	C	A	het	c.C2392A	p.Q798K
'C2ORF54'	Compound-het-het	2	241889808	241889808	C	A	het	c.C2392A	p.Q798K
'C2ORF54'	Compound-het-het	2	241874916	241874916	G	A	het	c.G1762A	p.G588R
'C2ORF54'	Compound-het-het	2	241874916	241874916	G	A	het	c.G1762A	p.G588R
'C2ORF54'	Compound-het-het	2	241873755	241873755	C	G	het	c.C1336G	p.R446G
'C2ORF54'	Compound-het-het	2	241874968	241874968	G	A	het	c.G1814A	p.G605E
'C2ORF54'	Compound-het-het	2	241827856	241827856	C	A	het	c.G657T:c.G1104T:c.G600T	p.Q219H:p.Q368H:p.Q200H
'C2ORF54'	Compound-het-het	2	241827926	241827926	C	A	het	c.G587T:c.G1034T:c.G530T	p.R196L:p.R345L:p.R177L
'C2ORF81'	Compound-het-het	2	74643345	74643345	G	C	het	c.C51G:c.C126G	p.D17E:p.D42E
'C3'	Compound-het-het	19	6678452	6678452	G	T	het	c.C4645A	p.L1549M
'C3'	Compound-het-het	19	6686274	6686274	C	T	het	c.G3671A	p.G1224D
'C3ORF18'	Recessive	3	50596267	50596267	G	A	hom	c.C311T	uc010hlp.3:p.S104L
'C3ORF38'	Compound-het-het	3	88514774	88514774	T	A	het	c.T267A	p.N89K
'C3ORF38'	Compound-het-het	3	88514943	88514943	G	A	het	c.G436A	p.A146T
'C3ORF38'	Compound-het-het	3	88515308	88515308	T	G	het	c.T801G	p.I267M
'C3ORF38'	Compound-het-het	3	88516141	88516141	T	C	het	c.T1634C	p.V545A
'C3ORF38'	Compound-het-het	3	88514774	88514774	T	A	het	c.T267A	p.N89K
'C3ORF38'	Compound-het-het	3	88514943	88514943	G	A	het	c.G436A	p.A146T
'C3ORF38'	Compound-het-het	3	88515308	88515308	T	G	het	c.T801G	p.I267M
'C3ORF38'	Compound-het-het	3	88516141	88516141	T	C	het	c.T1634C	p.V545A
'C3ORF38'	Compound-het-het	3	88516530	88516530	C	A	het	c.C2023A	p.H675N
'C3ORF38'	Compound-het-het	3	88516543	88516543	C	T	het	c.C2036T	p.A679V
'C3ORF55'	Compound-het-het	3	157289766	157289766	T	C	het	c.T236C	p.M79T
'C3ORF72'	Compound-het-het	3	138668739	138668739	T	A	het	c.T227A	p.L76Q
'C3ORF72'	Compound-het-het	3	138669289	138669289	C	T	het	c.C403T	p.P135S
'C4B'	Compound-het-het	6	31962287	31962287	G	A	het	c.G2605A	p.V869M
'C4B'	Compound-het-het	6	31995025	31995025	G	A	het	c.G2605A	p.V869M
'C4B_2'	Compound-het-het	6	31962287	31962287	G	A	het	c.G2605A	p.V869M
'C4B_2'	Compound-het-het	6	31995025	31995025	G	A	het	c.G2605A	p.V869M
'C4ORF21'	Compound-het-het	4	113510853	113510853	A	G	het	c.T3154C	p.S1052P
'C4ORF21'	Compound-het-het	4	113510853	113510853	A	G	het	c.T3154C	p.S1052P
'C4ORF26'	Compound-het-het	4	76481342	76481342	-	TATGC	het	c.50_51insTATGC	p.V18Mfs*3
'C4ORF26'	Compound-het-het	4	76481349	76481349	-	TGGTA	het	c.57_58insTGGTA	p.V20Wfs*2
'C4ORF26'	Compound-het-het	4	76481342	76481342	-	TATGC	het	c.50_51insTATGC	p.V18Mfs*3
'C4ORF26'	Compound-het-het	4	76481349	76481349	-	TGGTA	het	c.57_58insTGGTA	p.V20Wfs*2
'C4ORF26'	Compound-het-het	4	76489584	76489584	T	C	het	c.T328C	p.Y110H
'C4ORF40'	Compound-het-het	4	71007235	71007235	T	C	het	c.T38C	p.L13P
'C4ORF54'	Recessive	4	100570977	100570977	C	T	hom	c.G4829A	p.R1610H
'C5ORF42'	Compound-het-het	5	37170277	37170277	T	C	het	c.A3340G:c.A3472G:c.A6328G:c.A2968G	p.N1114D:p.N1158D:p.N2110D:p.N990D
'C5ORF42'	Compound-het-het	5	37184911	37184911	C	T	het	c.G1475A:c.G1604A:c.G4460A:c.G1103A	p.S492N:p.S535N:p.S1487N:p.S368N
'C5ORF42'	Compound-het-het	5	37170277	37170277	T	C	het	c.A3340G:c.A3472G:c.A6328G:c.A2968G	p.N1114D:p.N1158D:p.N2110D:p.N990D
'C5ORF42'	Compound-het-het	5	37184911	37184911	C	T	het	c.G1475A:c.G1604A:c.G4460A:c.G1103A	p.S492N:p.S535N:p.S1487N:p.S368N
'C5ORF60'	Compound-het-het	5	179078891	179078891	T	C	het	c.T374C	p.L125P
'C5ORF60'	Compound-het-het	5	179079372	179079372	C	T	het	c.C488T	p.T163I
'C6ORF132'	Compound-het-het	6	42073031	42073031	G	C	het	c.C2619G	p.H873Q
'C6ORF132'	Compound-het-het	6	42073048	42073048	G	C	het	c.C2602G	p.L868V
'C6ORF15'	Compound-het-het	6	31079285	31079350	CCCCAGCTGCCTCCTGGATACCGATTAATATTCCCCCAGCTGCCTCCTGGATACCGATTAATATTT	-	het	c.786_851del	p.N265_I286del
'C6ORF15'	Compound-het-het	6	31079417	31079417	C	A	het	c.G719T	p.G240V
'C6ORF165'	Compound-het-het	6	88173849	88173849	A	T	het	c.A1750T	p.R584W
'C6ORF58'	Compound-het-het	6	127898481	127898481	A	G	het	c.A151G	p.I51V
'C6ORF58'	Compound-het-het	6	127901535	127901535	G	A	het	c.G514A	p.V172I
'C6ORF58'	Compound-het-het	6	127898481	127898481	A	G	het	c.A151G	p.I51V
'C6ORF58'	Compound-het-het	6	127901535	127901535	G	A	het	c.G514A	p.V172I
'C6ORF70'	Compound-het-het	6	170155468	170155468	C	A	het	c.C265A	p.Q89K
'C6ORF70'	Compound-het-het	6	170155468	170155468	C	A	het	c.C265A	p.Q89K
'C7ORF26'	Compound-het-het	7	6647712	6647712	G	A	het	c.G1270A:c.G979A	p.A424T:p.A327T
'C7ORF26'	Compound-het-het	7	6642372	6642372	C	T	het	c.C275T	p.T92M
'C7ORF66'	Compound-het-het	7	108524528	108524528	T	C	het	c.A62G	p.H21R
'C7ORF66'	Compound-het-het	7	108540632	108540632	C	A	het	c.G24T	p.R8S
'C7ORF72'	Compound-het-het	7	50135931	50135931	T	C	het	c.T250C	p.Y84H
'C7ORF72'	Compound-het-het	7	50143960	50143960	C	A	het	c.C604A	p.R202S
'C9ORF57'	Compound-het-het	9	74671722	74671722	C	A	het	c.G99T:c.G201T	p.W33C:p.W67C
'C9ORF57'	Compound-het-het	9	74671739	74671739	T	C	het	c.A82G:c.A184G	p.K28E:p.K62E
'C9ORF57'	Compound-het-het	9	74671742	74671742	T	C	het	c.A79G:c.A181G	p.T27A:p.T61A
'C9ORF62'	Compound-het-het	9	138150892	138150892	C	T	het	c.G355A	p.V119I
'C9ORF62'	Compound-het-het	9	138150961	138150961	G	A	het	c.C286T	p.R96W
'C9ORF62'	Compound-het-het	9	138150717	138150798	GGGGCGACCAAGGTGATGCCAACTGCATGGGGTGACTTCGGTGATGCCCACTGTATGGGGTGACGGTGGTGATGCCGACCGC	-	het	c.449_530del	p.C150Yfs*68
'C9ORF62'	Compound-het-het	9	138151148	138151175	GGTGATGCCAACCATATGGGGTGACGGT	-	het	c.101_128del	p.H34Rfs*202
'C9ORF62'	Compound-het-het	9	138150717	138150798	GGGGCGACCAAGGTGATGCCAACTGCATGGGGTGACTTCGGTGATGCCCACTGTATGGGGTGACGGTGGTGATGCCGACCGC	-	het	c.449_530del	p.C150Yfs*68
'C9ORF62'	Recessive	9	138150864	138150864	C	T	hom	c.G383A	p.R128H
'C9ORF96'	Compound-het-het	9	136266968	136266968	G	C	het	c.G1300C	p.V434L
'C9ORF96'	Compound-het-het	9	136266968	136266968	G	C	het	c.G1300C	p.V434L
'CABIN1'	Compound-het-het	22	24494116	24494116	G	A	het	c.G4078A	p.V1360I
'CABP4'	Compound-het-het	11	67222944	67222944	G	C	het	c.G50C	p.G17A
'CABP4'	Compound-het-het	11	67223193	67223193	G	A	het	c.G299A	p.R100H
'CABS1'	Compound-het-het	4	71201545	71201545	G	C	het	c.G789C	p.K263N
'CABS1'	Compound-het-het	4	71201545	71201545	G	C	het	c.G789C	p.K263N
'CACFD1'	Compound-het-het	9	136325291	136325291	G	A	het	c.G103A	p.G35R
'CACFD1'	Compound-het-het	9	136333134	136333134	T	C	het	c.T286C:c.T412C:c.T328C	p.S96P:p.S138P:p.S110P
'CACFD1'	Compound-het-het	9	136333472	136333472	G	A	het	c.G313A:c.G439A	p.E105K:p.E147K
'CACFD1'	Compound-het-het	9	136333487	136333487	G	T	het	c.G328T:c.G454T	p.A110S:p.A152S
'CACFD1'	Compound-het-het	9	136333706	136333706	C	T	het	c.C449T:c.C575T	p.P150L:p.P192L
'CACHD1'	Compound-het-het	1	65138849	65138849	T	C	het	c.T2366C:c.T2519C	p.I789T:p.I840T
'CACHD1'	Compound-het-het	1	65139130	65139130	T	C	het	c.T2557C:c.T2710C	p.F853L:p.F904L
'CACNA1A'	Compound-het-het	19	13318142	13318142	G	C	het	c.C2931G:c.C3528G:c.C7506G	p.D977E:p.D1176E:p.D2502E
'CACNA1A'	Compound-het-het	19	13409710	13409710	G	A	het	c.C2737T:c.C2740T	p.P913S:p.P914S
'CACNA1F'	Recessive	X	49088324	49088324	C	T	hom	c.G91A	p.G31R
'CACNA1F'	Recessive	X	49086738	49086738	A	G	hom	c.T761C:c.T566C	p.I254T:p.I189T
'CACNA1F'	Recessive	X	49086738	49086738	A	G	hom	c.T761C:c.T566C	p.I254T:p.I189T
'CACNA1H'	Compound-het-het	16	1250269	1250269	A	T	het	c.A817T	p.T273S
'CACNA1H'	Compound-het-het	16	1268439	1268439	G	T	het	c.G5657T:c.G5675T	p.R1886L:p.R1892L
'CACNA1H'	Compound-het-het	16	1268604	1268604	C	T	het	c.C5822T:c.C5840T	p.P1941L:p.P1947L
'CACNA1H'	Compound-het-het	16	1268634	1268634	G	A	het	c.G5852A:c.G5870A	p.G1951E:p.G1957E
'CACNA2D4'	Compound-het-het	12	1904902	1904902	-	AGG	het	c.547_548insCCT:c.592_593insCCT:c.3082_3083insCCT:c.3157_3158insCCT:c.2965_2966insCCT	p.L182_L183insP:p.L197_L198insP:p.L1027_L1028insP:p.L1052_L1053insP:p.L988_L989insP
'CACNA2D4'	Compound-het-het	12	1965221	1965221	C	G	het	c.G1692C:c.G2034C:c.G2109C:c.G1917C	p.E564D:p.E678D:p.E703D:p.E639D
'CACNA2D4'	Compound-het-het	12	1989025	1989025	C	T	het	c.G1163A:c.G1508A:c.G1316A	p.S388N:p.S503N:p.S439N
'CALHM5'	Compound-het-het	6	116833259	116833259	A	C	het	c.A400C	p.S134R
'CALHM5'	Compound-het-het	6	116837115	116837115	C	T	het	c.C893T	p.T298M
'CALHM5'	Compound-het-het	6	116833259	116833259	A	C	het	c.A400C	p.S134R
'CALHM5'	Compound-het-het	6	116837115	116837115	C	T	het	c.C893T	p.T298M
'CAMK2B'	Compound-het-het	7	44284489	44284489	G	T	het	c.C540A	p.D180E
'CAMTA2'	Compound-het-het	17	4884587	4884587	C	G	het	c.G463C:c.G630C:c.G639C:c.G633C:c.G702C:c.G648C	p.D155H:p.Q210H:p.Q213H:p.Q211H:p.Q234H:p.Q216H
'CAPN10'	Compound-het-het	2	241526428	241526428	C	G	het	c.C100G	p.L34V
'CAPN10'	Compound-het-het	2	241537306	241537306	T	C	het	c.T143C:c.T1280C:c.T1483C:c.T1576C:c.T1745C	p.V48A:p.V427A:p.S495P:p.S526P:p.V582A
'CAPN15'	Compound-het-het	16	597112	597112	G	A	het	c.G274A	p.A92T
'CAPN15'	Compound-het-het	16	597209	597214	AGGACA	-	het	c.371_376del	p.K126_D127del
'CAPN2'	Compound-het-het	1	223946945	223946945	C	T	het	uc001hoc.3:c.C34T	p.P12S
'CAPN2'	Compound-het-het	1	223949314	223949314	G	C	het	c.G1561C:c.G1327C	p.E521Q:p.E443Q
'CAPN6'	Recessive	X	110494457	110494457	C	T	hom	c.G186A:c.G951A	p.M62I:p.M317I
'CAPS2'	Compound-het-het	12	75683412	75683412	C	G	het	c.G211C:c.G1195C:c.G745C:c.G1441C	p.V71L:p.V399L:p.V249L:p.V481L
'CARD11'	Compound-het-het	7	3180566	3180566	T	C	het	c.A68G	p.E23G
'CARD14'	Compound-het-het	17	78169109	78169109	C	T	het	c.C1408T	p.R470W
'CARD14'	Compound-het-het	17	78176139	78176139	C	T	het	c.C1301T	p.A434V
'CARD14'	Compound-het-het	17	78169109	78169109	C	T	het	c.C1408T	p.R470W
'CARD14'	Compound-het-het	17	78176139	78176139	C	T	het	c.C1301T	p.A434V
'CARD14'	Compound-het-het	17	78181951	78181951	G	A	het	c.G2822A	p.R941Q
'CARD14'	Compound-het-het	17	78182085	78182085	C	T	het	c.C2956T	p.R986C
'CARD14'	Compound-het-het	17	78181951	78181951	G	A	het	c.G2822A	p.R941Q
'CARD14'	Compound-het-het	17	78182085	78182085	C	T	het	c.C2956T	p.R986C
'CARD14'	Compound-het-het	17	78155428	78155428	C	T	het	c.C191T	p.T64I
'CARD14'	Compound-het-het	17	78172371	78172371	C	T	het	c.C1121T:c.C1832T	p.P374L:p.P611L
'CARD14'	Compound-het-het	17	78155428	78155428	C	T	het	c.C191T	p.T64I
'CARD14'	Compound-het-het	17	78172371	78172371	C	T	het	c.C1121T:c.C1832T	p.P374L:p.P611L
'CARD14'	Compound-het-het	17	78162159	78162159	G	A	het	c.G53A	p.R18H
'CARD14'	Compound-het-het	17	78166338	78166338	C	T	het	c.C565T:c.C1276T:c.C1208T	p.R189W:p.R426W:p.T403M
'CARD6'	Compound-het-het	5	40841762	40841762	G	A	het	c.G278A	p.R93K
'CARD6'	Compound-het-het	5	40843524	40843524	G	A	het	c.G554A	p.C185Y
'CARD6'	Compound-het-het	5	40843761	40843761	G	A	het	c.G791A	p.G264E
'CARF'	Compound-het-het	2	203848342	203848342	A	G	het	c.A1867G:c.A1909G:c.A1945G:c.A2173G	p.T623A:p.T637A:p.T649A:p.T725A
'CARF'	Compound-het-het	2	203806666	203806666	A	G	het	c.A41G	p.D14G
'CARF'	Compound-het-het	2	203817297	203817297	C	T	het	c.C16T:c.C58T:c.C232T:c.C94T:c.C286T:c.C322T	p.P6S:p.P20S:p.P78S:p.P32S:p.P96S:p.P108S
'CARF'	Compound-het-het	2	203806666	203806666	A	G	het	c.A41G	p.D14G
'CARF'	Compound-het-het	2	203817297	203817297	C	T	het	c.C16T:c.C58T:c.C232T:c.C94T:c.C286T:c.C322T	p.P6S:p.P20S:p.P78S:p.P32S:p.P96S:p.P108S
'CASC4'	Compound-het-het	15	44624249	44624251	AGC	-	het	c.549_551del:c.192_194del	p.A184del:p.A65del
'CASC4'	Compound-het-het	15	44673112	44673112	A	G	het	c.A1010G	p.Q337R
'CASP5'	Compound-het-het	11	104878012	104878012	T	G	het	c.A57C:c.A231C:c.A132C:c.A270C:c.A183C	p.K19N:p.K77N:p.K44N:p.K90N:p.K61N
'CASP5'	Compound-het-het	11	104878041	104878041	-	TT	het	c.27_28insAA:c.201_202insAA:c.102_103insAA:c.240_241insAA:c.153_154insAA	p.T10Kfs*27:p.T68Kfs*27:p.T35Kfs*27:p.T81Kfs*27:p.T52Kfs*27
'CASP5'	Compound-het-het	11	104869651	104869651	C	T	het	c.G631A:c.G883A:c.G1057A:c.G1096A	p.E211K:p.E295K:p.E353K:p.E366K
'CASP5'	Compound-het-het	11	104871047	104871047	C	T	het	c.G467A:c.G719A:c.G893A:c.G932A	p.R156H:p.R240H:p.R298H:p.R311H
'CASP5'	Compound-het-het	11	104869651	104869651	C	T	het	c.G631A:c.G883A:c.G1057A:c.G1096A	p.E211K:p.E295K:p.E353K:p.E366K
'CASP7'	Compound-het-het	10	115485616	115485616	G	A	het	c.G485A	p.R162H
'CASP8AP2'	Compound-het-het	6	90572081	90572081	T	G	het	.	.
'CASP8AP2'	Compound-het-het	6	90576005	90576005	A	G	het	.	.
'CASP8AP2'	Compound-het-het	6	90572081	90572081	T	G	het	.	.
'CASP8AP2'	Compound-het-het	6	90576005	90576005	A	G	het	.	.
'CASP8AP2'	Compound-het-het	6	90576853	90576853	A	C	het	.	.
'CASP8AP2'	Compound-het-het	6	90576860	90576860	A	G	het	.	.
'CAT'	Recessive	11	34492529	34492529	C	T	hom	c.C1459T	p.P487S
'CAT'	Recessive	11	34492529	34492529	C	T	hom	c.C1459T	p.P487S
'CATSPERB'	Compound-het-het	14	92040763	92040763	G	T	het	c.C194A	p.S65X
'CATSPERB'	Compound-het-het	14	92126304	92126304	C	T	het	c.G1309A	p.G437S
'CBARP'	Compound-het-het	19	1229257	1229257	G	A	het	c.C2099T	p.P700L
'CBARP'	Compound-het-het	19	1234617	1234617	T	G	het	c.A562C:c.A640C:c.A580C	p.T188P:p.T214P:p.T194P
'CBFA2T3'	Compound-het-het	16	89017433	89017433	C	T	het	c.C907T	p.R303W
'CBFA2T3'	Compound-het-het	16	88943542	88943542	C	T	het	c.G1576A:c.G1546A:c.G1804A:c.G1690A	p.V526M:p.V516M:p.V602M:p.V564M
'CBFA2T3'	Compound-het-het	16	88947735	88947735	G	A	het	c.C1138T:c.C1108T:c.C1366T:c.C1252T:c.C1183T	p.R380C:p.R370C:p.R456C:p.R418C:p.R395C
'CBFA2T3'	Compound-het-het	16	88943625	88943625	C	T	het	c.G1493A:c.G1463A:c.G1721A:c.G1607A	p.R498H:p.R488H:p.R574H:p.R536H
'CBFA2T3'	Compound-het-het	16	88951552	88951552	G	A	het	c.C791T:c.C761T:c.C1019T:c.C905T:c.C836T	p.P264L:p.P254L:p.P340L:p.P302L:p.P279L
'CBFA2T3'	Compound-het-het	16	88943625	88943625	C	T	het	c.G1493A:c.G1463A:c.G1721A:c.G1607A	p.R498H:p.R488H:p.R574H:p.R536H
'CBFA2T3'	Compound-het-het	16	88951552	88951552	G	A	het	c.C791T:c.C761T:c.C1019T:c.C905T:c.C836T	p.P264L:p.P254L:p.P340L:p.P302L:p.P279L
'CBLC'	Compound-het-het	19	45281375	45281375	C	T	het	c.C187T	p.R63W
'CBLC'	Compound-het-het	19	45284495	45284495	C	T	het	c.C532T	p.L178F
'CBLC'	Compound-het-het	19	45281375	45281375	C	T	het	c.C187T	p.R63W
'CBLC'	Compound-het-het	19	45284495	45284495	C	T	het	c.C532T	p.L178F
'CBR4'	Compound-het-het	4	169923348	169923348	C	A	het	c.G409T:c.G430T	p.V137F:p.V144F
'CBWD3'	Recessive	9	70862550	70862550	T	G	hom	c.T263G:c.T254G	p.L88X:p.L85X
'CBWD5'	Recessive	9	70862550	70862550	T	G	hom	c.T263G:c.T254G	p.L88X:p.L85X
'CC2D1A'	Compound-het-het	19	14020658	14020658	C	A	het	c.C83A	p.S28Y
'CC2D1A'	Compound-het-het	19	14030730	14030730	G	T	het	c.G1322T	p.G441V
'CCAR2'	Compound-het-het	8	22476746	22476746	G	A	het	c.G1630A:c.G2605A	p.A544T:p.A869T
'CCDC102B'	Recessive	18	66564600	66564600	T	A	hom	c.T1198A	p.L400I
'CCDC105'	Compound-het-het	19	15121702	15121702	G	T	het	c.G65T	p.R22L
'CCDC105'	Compound-het-het	19	15121824	15121824	G	C	het	c.G187C	p.G63R
'CCDC105'	Compound-het-het	19	15121858	15121858	G	C	het	c.G221C	p.R74P
'CCDC127'	Recessive	5	205939	205939	C	T	hom	c.G256A	p.A86T
'CCDC14'	Compound-het-het	3	123649986	123649986	G	A	het	c.C808T:c.C1405T:c.C1285T:c.C1762T:c.C1828T:c.C1885T	p.R270C:p.R469C:p.R429C:p.R588C:p.R610C:p.R629C
'CCDC14'	Compound-het-het	3	123649986	123649986	G	A	het	c.C808T:c.C1405T:c.C1285T:c.C1762T:c.C1828T:c.C1885T	p.R270C:p.R469C:p.R429C:p.R588C:p.R610C:p.R629C
'CCDC142'	Compound-het-het	2	74709256	74709256	G	C	het	c.C709G	p.R237G
'CCDC144A'	Compound-het-het	17	16612458	16612458	G	T	het	c.G1084T:c.G1087T	p.E362X:p.E363X
'CCDC144B'	Compound-het-het	17	18513594	18513594	T	G	het	uc002guc.2:c.A427C	p.T143P
'CCDC144B'	Compound-het-het	17	18528708	18528708	A	G	het	uc002guc.2:c.T53C	p.L18P
'CCDC144B'	Compound-het-het	17	18513594	18513594	T	G	het	uc002guc.2:c.A427C	p.T143P
'CCDC144B'	Compound-het-het	17	18528708	18528708	A	G	het	uc002guc.2:c.T53C	p.L18P
'CCDC144NL'	Recessive	17	20769866	20769866	G	A	hom	c.C566T	p.P189L
'CCDC144NL'	Recessive	17	20769896	20769896	G	T	hom	c.C536A	p.T179N
'CCDC144NL'	Recessive	17	20769899	20769899	G	T	hom	c.C533A	p.S178X
'CCDC146'	Compound-het-het	7	76909913	76909913	A	G	het	c.A1004G:c.A1862G	p.E335G:p.E621G
'CCDC146'	Compound-het-het	7	76922297	76922297	A	C	het	c.A1586C:c.A2444C	p.N529T:p.N815T
'CCDC146'	Compound-het-het	7	76909913	76909913	A	G	het	c.A1004G:c.A1862G	p.E335G:p.E621G
'CCDC146'	Compound-het-het	7	76922297	76922297	A	C	het	c.A1586C:c.A2444C	p.N529T:p.N815T
'CCDC150'	Compound-het-het	2	197511069	197511069	A	G	het	c.A17G	p.H6R
'CCDC150'	Compound-het-het	2	197540921	197540921	G	A	het	c.G196A:c.G1192A	p.A66T:p.A398T
'CCDC158'	Compound-het-het	4	77247061	77247061	T	C	het	c.A3106G	p.T1036A
'CCDC158'	Compound-het-het	4	77247061	77247061	T	C	het	c.A3106G	p.T1036A
'CCDC158'	Compound-het-het	4	77296730	77296730	G	A	het	c.C1157T	p.A386V
'CCDC162P'	Compound-het-het	6	109659714	109659714	T	A	het	uc003ptc.1:c.T37A	p.L13M
'CCDC168'	Compound-het-het	13	103385771	103385771	C	G	het	c.G3389C	p.R1130T
'CCDC168'	Compound-het-het	13	103385954	103385954	A	G	het	c.T3206C	p.L1069P
'CCDC168'	Compound-het-het	13	103394178	103394178	C	T	het	c.G8869A	p.D2957N
'CCDC168'	Compound-het-het	13	103396769	103396769	C	T	het	c.G6278A	p.R2093H
'CCDC168'	Compound-het-het	13	103388378	103388378	C	T	het	c.G782A	p.G261D
'CCDC168'	Compound-het-het	13	103390322	103390322	T	C	het	c.A12725G	p.E4242G
'CCDC168'	Compound-het-het	13	103388378	103388378	C	T	het	c.G782A	p.G261D
'CCDC168'	Compound-het-het	13	103390322	103390322	T	C	het	c.A12725G	p.E4242G
'CCDC168'	Compound-het-het	13	103383358	103383358	T	A	het	c.A5802T	p.K1934N
'CCDC168'	Compound-het-het	13	103387719	103387719	A	G	het	c.T1441C	p.S481P
'CCDC168'	Compound-het-het	13	103383358	103383358	T	A	het	c.A5802T	p.K1934N
'CCDC168'	Compound-het-het	13	103387719	103387719	A	G	het	c.T1441C	p.S481P
'CCDC168'	Compound-het-het	13	103398453	103398453	C	A	het	c.G4594T	p.G1532C
'CCDC168'	Compound-het-het	13	103399761	103399761	G	T	het	c.C3286A	p.P1096T
'CCDC168'	Compound-het-het	13	103401480	103401480	T	C	het	c.A1567G	p.N523D
'CCDC168'	Compound-het-het	13	103383497	103383497	T	C	het	c.A5663G	p.N1888S
'CCDC168'	Compound-het-het	13	103393533	103393533	A	G	het	c.T9514C	p.F3172L
'CCDC168'	Compound-het-het	13	103385370	103385370	T	C	het	c.A3790G	p.I1264V
'CCDC168'	Compound-het-het	13	103387430	103387430	G	A	het	c.C1730T	p.S577F
'CCDC168'	Compound-het-het	13	103390074	103390074	C	T	het	c.G12973A	p.A4325T
'CCDC168'	Compound-het-het	13	103390322	103390322	T	C	het	c.A12725G	p.E4242G
'CCDC168'	Compound-het-het	13	103382660	103382660	A	G	het	c.T6500C	p.V2167A
'CCDC168'	Compound-het-het	13	103395065	103395065	G	C	het	c.C7982G	p.P2661R
'CCDC180'	Compound-het-het	9	100056272	100056272	G	T	het	c.G130T:c.G250T	p.V44L:p.V84L
'CCDC180'	Compound-het-het	9	100070367	100070367	A	C	het	c.A154C:c.A571C	p.T52P:p.T191P
'CCDC180'	Compound-het-het	9	100107890	100107890	G	A	het	c.G2624A	p.R875Q
'CCDC180'	Compound-het-het	9	100109618	100109618	C	G	het	c.C2653G	p.H885D
'CCDC180'	Compound-het-het	9	100133931	100133931	G	A	het	c.G4675A:c.G4510A	p.E1559K:p.E1504K
'CCDC180'	Compound-het-het	9	100137761	100137761	G	A	het	c.G4864A:c.G4699A	p.E1622K:p.E1567K
'CCDC183'	Compound-het-het	9	139698977	139698977	G	A	het	c.G688A	p.V230I
'CCDC185'	Compound-het-het	1	223568225	223568225	C	T	het	c.C1408T	p.R470W
'CCDC185'	Compound-het-het	1	223712821	223712821	T	C	het	c.A137G	p.D46G
'CCDC191'	Compound-het-het	3	113772448	113772448	A	G	het	c.T125C	p.I42T
'CCDC191'	Compound-het-het	3	113775379	113775379	C	T	het	c.G8A	p.R3Q
'CCDC196'	Compound-het-het	14	66455313	66455313	C	A	het	c.G120T	p.Q40H
'CCDC28A'	Compound-het-het	6	139048607	139048607	C	A	het	c.G324T	p.M108I
'CCDC28A'	Compound-het-het	6	139094893	139094893	T	-	het	c.82delT	p.L28Yfs*18
'CCDC37'	Compound-het-het	3	126137966	126137966	G	A	het	c.G701A:c.G698A	p.R234Q:p.R233Q
'CCDC38'	Compound-het-het	12	96312743	96312743	C	G	het	c.G49C	p.D17H
'CCDC40'	Compound-het-het	17	78032353	78032353	T	C	het	c.T1220C	p.I407T
'CCDC40'	Compound-het-het	17	78039374	78039374	G	A	het	c.G1531A	p.E511K
'CCDC40'	Compound-het-het	17	78041446	78041446	G	A	het	c.G1705A	p.G569S
'CCDC40'	Recessive	17	78063567	78063567	C	T	hom	c.C2716T	p.Q906X
'CCDC40'	Compound-het-het	17	78059902	78059902	G	A	het	c.G2336A	p.R779H
'CCDC40'	Compound-het-het	17	78064113	78064113	A	C	het	c.A3008C	p.N1003T
'CCDC40'	Compound-het-het	17	78059902	78059902	G	A	het	c.G2336A	p.R779H
'CCDC40'	Compound-het-het	17	78064113	78064113	A	C	het	c.A3008C	p.N1003T
'CCDC40'	Compound-het-het	17	78032436	78032436	G	A	het	c.G1303A	p.E435K
'CCDC40'	Compound-het-het	17	78064113	78064113	A	C	het	c.A3008C	p.N1003T
'CCDC40'	Compound-het-het	17	78032436	78032436	G	A	het	c.G1303A	p.E435K
'CCDC40'	Compound-het-het	17	78064113	78064113	A	C	het	c.A3008C	p.N1003T
'CCDC40'	Compound-het-het	17	78059902	78059902	G	A	het	c.G2336A	p.R779H
'CCDC40'	Compound-het-het	17	78064002	78064002	G	A	het	c.G2897A	p.G966D
'CCDC40'	Compound-het-het	17	78064113	78064113	A	C	het	c.A3008C	p.N1003T
'CCDC54'	Compound-het-het	3	107096847	107096847	A	G	het	c.A413G	p.K138R
'CCDC54'	Compound-het-het	3	107097407	107097407	G	A	het	c.G973A	p.V325I
'CCDC54'	Compound-het-het	3	107096847	107096847	A	G	het	c.A413G	p.K138R
'CCDC54'	Compound-het-het	3	107097407	107097407	G	A	het	c.G973A	p.V325I
'CCDC61'	Recessive	19	46521569	46521569	C	T	hom	c.C923T:c.C1463T:c.C1520T	p.A308V:p.A488V:p.A507V
'CCDC64B'	Compound-het-het	16	3081129	3081129	T	C	het	c.A305G	p.E102G
'CCDC64B'	Compound-het-het	16	3085397	3085397	C	T	het	c.G101A	p.R34Q
'CCDC64B'	Compound-het-het	16	3081129	3081129	T	C	het	c.A305G	p.E102G
'CCDC64B'	Compound-het-het	16	3085397	3085397	C	T	het	c.G101A	p.R34Q
'CCDC73'	Compound-het-het	11	32634988	32634988	A	C	het	c.T2876G	p.V959G
'CCDC73'	Compound-het-het	11	32635078	32635078	G	A	het	c.C2786T	p.S929F
'CCDC77'	Compound-het-het	12	527769	527769	G	A	het	c.G284A:c.G380A	p.R95H:p.R127H
'CCDC77'	Compound-het-het	12	550074	550074	G	A	het	c.G1136A:c.G1232A	p.R379H:p.R411H
'CCDC80'	Compound-het-het	3	112357515	112357515	T	G	het	c.A1238C	p.N413T
'CCDC88B'	Compound-het-het	11	64117067	64117067	C	T	het	c.C245T:c.C2789T	p.A82V:p.A930V
'CCDC88B'	Compound-het-het	11	64119060	64119060	G	A	het	c.G527A:c.G3071A	p.R176Q:p.R1024Q
'CCDC88B'	Compound-het-het	11	64124537	64124537	C	G	het	c.C391G:c.C1716G:c.C4402G	p.R131G:p.N572K:p.R1468G
'CCDC88C'	Compound-het-het	14	91770261	91770261	T	C	het	c.A3419G	p.Q1140R
'CCDC88C'	Compound-het-het	14	91739105	91739105	C	T	het	c.G1523A:c.G5951A	p.R508Q:p.R1984Q
'CCDC88C'	Compound-het-het	14	91770261	91770261	T	C	het	c.A3419G	p.Q1140R
'CCDC88C'	Compound-het-het	14	91739105	91739105	C	T	het	c.G1523A:c.G5951A	p.R508Q:p.R1984Q
'CCDC88C'	Compound-het-het	14	91770261	91770261	T	C	het	c.A3419G	p.Q1140R
'CCDC88C'	Compound-het-het	14	91749724	91749724	T	C	het	c.A151G:c.A4579G	p.T51A:p.T1527A
'CCDC88C'	Compound-het-het	14	91755457	91755457	A	G	het	c.T4433C	p.V1478A
'CCDC88C'	Compound-het-het	14	91779767	91779767	G	A	het	c.C2393T	p.A798V
'CCDC88C'	Compound-het-het	14	91745594	91745594	G	A	het	c.C328T:c.C4756T	p.L110F:p.L1586F
'CCDC88C'	Compound-het-het	14	91755556	91755556	G	A	het	c.C4334T	p.P1445L
'CCDC88C'	Compound-het-het	14	91755563	91755563	C	T	het	c.G4327A	p.A1443T
'CCHCR1'	Compound-het-het	6	31111059	31111059	T	C	het	c.A1873G:c.A2032G:c.A2299G:c.A2191G	p.R625G:p.R678G:p.R767G:p.R731G
'CCHCR1'	Compound-het-het	6	31111088	31111088	C	T	het	c.G1844A:c.G2003A:c.G2270A:c.G2162A	p.R615Q:p.R668Q:p.R757Q:p.R721Q
'CCL24'	Compound-het-het	7	75441146	75441146	G	C	het	c.C328G	p.Q110E
'CCL24'	Compound-het-het	7	75441170	75441170	C	T	het	c.G304A	p.A102T
'CCL3L3'	Compound-het-het	17	34499256	34499256	G	A	het	c.C455T	p.T152I
'CCL4'	Compound-het-het	17	34499256	34499256	G	A	het	c.C455T	p.T152I
'CCN5'	Compound-het-het	20	43344039	43344039	G	A	het	c.G8A	p.G3D
'CCN5'	Compound-het-het	20	43353472	43353472	A	G	het	c.A371G	p.E124G
'CCNE2'	Compound-het-het	8	95897369	95897369	C	G	het	c.G757C	p.V253L
'CCNE2'	Compound-het-het	8	95897369	95897369	C	G	het	c.G757C	p.V253L
'CCP110'	Compound-het-het	16	19548511	19548511	C	T	het	c.C1520T	p.P507L
'CCP110'	Compound-het-het	16	19554000	19554000	A	G	het	c.A2285G	p.Y762C
'CCP110'	Compound-het-het	16	19548511	19548511	C	T	het	c.C1520T	p.P507L
'CCP110'	Compound-het-het	16	19554000	19554000	A	G	het	c.A2285G	p.Y762C
'CCSER1'	Compound-het-het	4	91229617	91229617	G	C	het	c.G182C	p.S61T
'CCSER1'	Compound-het-het	4	91234118	91234118	C	T	het	c.C1429T	p.P477S
'CCSER1'	Compound-het-het	4	91229617	91229617	G	C	het	c.G182C	p.S61T
'CCSER1'	Compound-het-het	4	91234118	91234118	C	T	het	c.C1429T	p.P477S
'CCSER1'	Compound-het-het	4	91389444	91389444	A	G	het	c.A1663G	p.M555V
'CCZ1B'	Recessive	7	6844681	6844681	C	T	hom	c.G565A:c.G994A	p.V189I:p.V332I
'CD101'	Compound-het-het	1	117568358	117568358	C	T	het	c.C2656T	p.R886C
'CD101'	Compound-het-het	1	117568358	117568358	C	T	het	c.C2656T	p.R886C
'CD101'	Compound-het-het	1	117576550	117576550	G	A	het	c.G2893A	p.V965I
'CD101'	Compound-het-het	1	117576619	117576619	C	T	het	c.C2962T	p.R988C
'CD109'	Compound-het-het	6	74493537	74493537	C	T	het	c.C1982T:c.C2213T	p.T661I:p.T738I
'CD109'	Compound-het-het	6	74533191	74533191	C	T	het	c.C3941T:c.C4172T:c.C4121T	p.A1314V:p.A1391V:p.A1374V
'CD109'	Compound-het-het	6	74493537	74493537	C	T	het	c.C1982T:c.C2213T	p.T661I:p.T738I
'CD109'	Compound-het-het	6	74533191	74533191	C	T	het	c.C3941T:c.C4172T:c.C4121T	p.A1314V:p.A1391V:p.A1374V
'CD209'	Compound-het-het	19	7808069	7808069	C	T	het	c.G886A	p.G296R
'CD209'	Compound-het-het	19	7810490	7810490	C	T	het	c.G530A:c.G590A:c.G662A	p.R177Q:p.R197Q:p.R221Q
'CD209'	Compound-het-het	19	7810510	7810510	C	G	het	c.G510C:c.G570C:c.G642C	p.E170D:p.E190D:p.E214D
'CD209'	Compound-het-het	19	7808069	7808069	C	T	het	c.G886A	p.G296R
'CD209'	Compound-het-het	19	7810490	7810490	C	T	het	c.G530A:c.G590A:c.G662A	p.R177Q:p.R197Q:p.R221Q
'CD209'	Compound-het-het	19	7808069	7808069	C	T	het	c.G886A	p.G296R
'CD209'	Compound-het-het	19	7810490	7810490	C	T	het	c.G530A:c.G590A:c.G662A	p.R177Q:p.R197Q:p.R221Q
'CD209'	Compound-het-het	19	7810510	7810510	C	G	het	c.G510C:c.G570C:c.G642C	p.E170D:p.E190D:p.E214D
'CD209'	Compound-het-het	19	7808069	7808069	C	T	het	c.G886A	p.G296R
'CD209'	Compound-het-het	19	7810490	7810490	C	T	het	c.G530A:c.G590A:c.G662A	p.R177Q:p.R197Q:p.R221Q
'CD209'	Compound-het-het	19	7810510	7810510	C	G	het	c.G510C:c.G570C:c.G642C	p.E170D:p.E190D:p.E214D
'CD37'	Compound-het-het	19	49840976	49840976	G	A	het	c.G436A	p.A146T
'CD37'	Compound-het-het	19	49842182	49842182	A	G	het	c.A673G:c.A469G	p.I225V:p.I157V
'CD3EAP'	Compound-het-het	19	45910441	45910441	C	T	het	c.C112T:c.C118T	p.P38S:p.P40S
'CD3EAP'	Compound-het-het	19	45911748	45911748	G	T	het	c.G522T:c.G528T	p.K174N:p.K176N
'CD3EAP'	Compound-het-het	19	45912257	45912257	C	T	het	c.C1031T:c.C1037T	p.T344M:p.T346M
'CD3EAP'	Compound-het-het	19	45910441	45910441	C	T	het	c.C112T:c.C118T	p.P38S:p.P40S
'CD3EAP'	Compound-het-het	19	45911748	45911748	G	T	het	c.G522T:c.G528T	p.K174N:p.K176N
'CD3EAP'	Compound-het-het	19	45912257	45912257	C	T	het	c.C1031T:c.C1037T	p.T344M:p.T346M
'CD3EAP'	Compound-het-het	19	45910441	45910441	C	T	het	c.C112T:c.C118T	p.P38S:p.P40S
'CD3EAP'	Compound-het-het	19	45911748	45911748	G	T	het	c.G522T:c.G528T	p.K174N:p.K176N
'CD3EAP'	Compound-het-het	19	45912257	45912257	C	T	het	c.C1031T:c.C1037T	p.T344M:p.T346M
'CD5'	Compound-het-het	11	60891367	60891367	A	C	het	c.A1237C	p.K413Q
'CD5'	Compound-het-het	11	60891367	60891367	A	C	het	c.A1237C	p.K413Q
'CD70'	Compound-het-het	19	6583330	6583330	T	C	het	c.A608G	p.N203S
'CD81'	Compound-het-het	11	2415225	2415225	C	T	het	c.C100T	p.Q34X
'CD81'	Compound-het-het	11	2415232	2415232	G	T	het	c.G107T	p.G36V
'CD97'	Compound-het-het	19	14513562	14513562	A	G	het	c.A1058G:c.A1190G:c.A1337G	p.N353S:p.N397S:p.N446S
'CD97'	Compound-het-het	19	14516704	14516704	G	C	het	c.G1495C:c.G1627C:c.G1774C	p.V499L:p.V543L:p.V592L
'CDC14C'	Compound-het-het	7	48887751	48887751	C	A	het	c.C251A	p.A84D
'CDC14C'	Compound-het-het	7	48887771	48887771	G	C	het	c.G271C	p.A91P
'CDC20B'	Compound-het-het	5	54410115	54410115	C	A	het	c.G1365T:c.G1479T:c.G1491T	p.L455F:p.L493F:p.L497F
'CDC20B'	Compound-het-het	5	54423134	54423134	G	A	het	c.C940T	p.H314Y
'CDC42BPG'	Compound-het-het	11	64597724	64597724	C	G	het	c.G3309C	p.Q1103H
'CDC42BPG'	Compound-het-het	11	64597724	64597724	C	G	het	c.G3309C	p.Q1103H
'CDC42EP2'	Compound-het-het	11	65088844	65088844	C	T	het	c.C475T	p.P159S
'CDCA2'	Compound-het-het	8	25364220	25364220	A	G	het	c.A1993G:c.A2038G	p.T665A:p.T680A
'CDH12'	Compound-het-het	5	21760757	21760757	G	A	het	c.C1423T:c.C1543T	p.R475X:p.R515X
'CDH12'	Compound-het-het	5	21817209	21817209	G	C	het	c.C727G:c.C847G	p.P243A:p.P283A
'CDH18'	Compound-het-het	5	19544029	19544029	C	T	het	c.G1177A:c.G1339A	p.D393N:p.D447N
'CDH23'	Compound-het-het	10	73565980	73565980	C	T	het	c.C1400T:c.C8135T	p.P467L:p.P2712L
'CDH23'	Compound-het-het	10	73570263	73570263	C	G	het	c.C2294G:c.C9029G	p.A765G:p.A3010G
'CDH23'	Compound-het-het	10	73571307	73571307	G	A	het	c.G2518A:c.G9253A	p.A840T:p.A3085T
'CDH23'	Compound-het-het	10	73565980	73565980	C	T	het	c.C1400T:c.C8135T	p.P467L:p.P2712L
'CDH23'	Compound-het-het	10	73570263	73570263	C	G	het	c.C2294G:c.C9029G	p.A765G:p.A3010G
'CDH23'	Compound-het-het	10	73571307	73571307	G	A	het	c.G2518A:c.G9253A	p.A840T:p.A3085T
'CDH26'	Compound-het-het	20	58557999	58557999	C	T	het	c.C415T	p.R139C
'CDH3'	Compound-het-het	16	68716257	68716257	C	T	het	c.C884T:c.C1049T	p.T295M:p.T350M
'CDHR3'	Compound-het-het	7	105662809	105662809	C	T	het	c.C1727T:c.C1991T	p.A576V:p.A664V
'CDHR3'	Compound-het-het	7	105662869	105662869	C	A	het	c.C1787A:c.C2051A	p.T596N:p.T684N
'CDHR5'	Compound-het-het	11	617388	617388	G	A	het	c.C1919T:c.C2501T	p.P640L:p.P834L
'CDHR5'	Compound-het-het	11	618821	618822	GA	-	het	c.1737_1738del	p.Q580Afs*134
'CDK10'	Compound-het-het	16	89762056	89762056	G	A	het	c.G898A:c.G1039A	p.A300T:p.A347T
'CDK11A'	Recessive	1	1635004	1635004	T	G	hom	c.A1869C:c.A1968C:c.A1941C:c.A1980C:c.A1971C	p.K623N:p.K656N:p.K647N:p.K660N:p.K657N
'CDK2AP2P2'	Compound-het-het	9	66499690	66499690	G	A	het	c.G500A	p.G167D
'CDK2AP2P2'	Compound-het-het	9	66499711	66499711	A	T	het	c.A521T	p.E174V
'CDK5RAP1'	Compound-het-het	20	31954726	31954726	T	A	het	c.A1250T:c.A1481T:c.A1211T:c.A1523T	p.E417V:p.E494V:p.E404V:p.E508V
'CDKL5'	Recessive	X	18622465	18622465	C	T	hom	c.C1421T	p.P474L
'CDKL5'	Recessive	X	18668673	18668673	C	G	hom	c.C2941G	p.R981G
'CDSN'	Compound-het-het	6	31084817	31084817	G	A	het	c.C575T	p.P192L
'CDSN'	Compound-het-het	6	31085136	31085136	C	T	het	c.G256A	p.G86S
'CDT1'	Compound-het-het	16	88870369	88870369	A	C	het	c.A130C	p.T44P
'CDT1'	Compound-het-het	16	88871222	88871222	C	T	het	c.C404T	p.A135V
'CDT1'	Compound-het-het	16	88871016	88871016	A	G	het	c.A292G	p.I98V
'CDT1'	Compound-het-het	16	88873885	88873885	G	A	het	c.G1472A	p.S491N
'CEBPA'	Compound-het-het	19	33793096	33793096	G	T	het	c.C225A	p.D75E
'CEBPA'	Compound-het-het	19	33793096	33793096	G	T	het	c.C225A	p.D75E
'CEBPE'	Compound-het-het	14	23573861	23573861	C	T	het	c.G269A	p.R90Q
'CECR2'	Compound-het-het	22	18021876	18021876	C	A	het	c.C1981A:c.C1978A:c.C1555A	p.P661T:p.P660T:p.P519T
'CEL'	Compound-het-het	9	135937450	135937450	G	T	het	c.G61T:c.G70T	p.A21S:p.A24S
'CEL'	Compound-het-het	9	135946508	135946508	G	A	het	c.G1421A:c.G1628A	p.R474H:p.R543H
'CELF3'	Compound-het-het	1	151682978	151682978	G	T	het	c.G10T	p.V4L
'CELSR2'	Compound-het-het	1	109792923	109792923	T	G	het	c.T222G	p.D74E
'CELSR2'	Compound-het-het	1	109794677	109794677	C	T	het	c.C1976T	p.T659I
'CELSR3'	Compound-het-het	3	48679880	48679880	T	C	het	c.A8576G:c.A8591G	p.H2859R:p.H2864R
'CELSR3'	Compound-het-het	3	48696487	48696487	C	T	het	c.G3581A	p.R1194H
'CEMIP2'	Compound-het-het	9	74345025	74345025	A	G	het	c.T1729C:c.T1918C	p.C577R:p.C640R
'CENPBD1P1'	Recessive	19	59093604	59093604	-	AAAAAAAAAA	hom	c.216_217insAAAAAAAAAA	p.A78Kfs*49
'CENPBD1P1'	Recessive	19	59093604	59093604	-	AAAAAAAAAA	hom	c.216_217insAAAAAAAAAA	p.A78Kfs*49
'CENPBD1P1'	Recessive	19	59093604	59093604	-	AAAAAAAAAAAAA	hom	c.216_217insAAAAAAAAAAAAA	p.A78Kfs*50
'CENPC'	Compound-het-het	4	68405569	68405569	G	C	het	c.C220G	p.P74A
'CENPC'	Compound-het-het	4	68358623	68358623	T	C	het	c.A241G:c.A2104G:c.A2383G	p.N81D:p.N702D:p.N795D
'CENPC'	Compound-het-het	4	68385211	68385211	T	C	het	c.A62G:c.A341G	p.H21R:p.H114R
'CENPC'	Compound-het-het	4	68358623	68358623	T	C	het	c.A241G:c.A2104G:c.A2383G	p.N81D:p.N702D:p.N795D
'CENPC'	Compound-het-het	4	68385211	68385211	T	C	het	c.A62G:c.A341G	p.H21R:p.H114R
'CENPC'	Compound-het-het	4	68405569	68405569	G	C	het	c.C220G	p.P74A
'CENPC'	Compound-het-het	4	68405569	68405569	G	C	het	c.C220G	p.P74A
'CENPC'	Compound-het-het	4	68358623	68358623	T	C	het	c.A241G:c.A2104G:c.A2383G	p.N81D:p.N702D:p.N795D
'CENPC'	Compound-het-het	4	68385211	68385211	T	C	het	c.A62G:c.A341G	p.H21R:p.H114R
'CENPC1'	Compound-het-het	4	68405569	68405569	G	C	het	c.C220G	p.P74A
'CENPC1'	Compound-het-het	4	68358623	68358623	T	C	het	c.A241G:c.A2104G:c.A2383G	p.N81D:p.N702D:p.N795D
'CENPC1'	Compound-het-het	4	68385211	68385211	T	C	het	c.A62G:c.A341G	p.H21R:p.H114R
'CENPC1'	Compound-het-het	4	68358623	68358623	T	C	het	c.A241G:c.A2104G:c.A2383G	p.N81D:p.N702D:p.N795D
'CENPC1'	Compound-het-het	4	68385211	68385211	T	C	het	c.A62G:c.A341G	p.H21R:p.H114R
'CENPC1'	Compound-het-het	4	68405569	68405569	G	C	het	c.C220G	p.P74A
'CENPC1'	Compound-het-het	4	68405569	68405569	G	C	het	c.C220G	p.P74A
'CENPC1'	Compound-het-het	4	68358623	68358623	T	C	het	c.A241G:c.A2104G:c.A2383G	p.N81D:p.N702D:p.N795D
'CENPC1'	Compound-het-het	4	68385211	68385211	T	C	het	c.A62G:c.A341G	p.H21R:p.H114R
'CENPE'	Compound-het-het	4	104066290	104066290	T	G	het	c.A4699C:c.A4774C	p.K1567Q:p.K1592Q
'CENPE'	Compound-het-het	4	104070433	104070433	T	A	het	c.A3454T:c.A3529T	p.M1152L:p.M1177L
'CENPE'	Compound-het-het	4	104082545	104082545	T	C	het	c.A1837G:c.A1912G	p.K613E:p.K638E
'CENPE'	Compound-het-het	4	104066290	104066290	T	G	het	c.A4699C:c.A4774C	p.K1567Q:p.K1592Q
'CENPE'	Compound-het-het	4	104070433	104070433	T	A	het	c.A3454T:c.A3529T	p.M1152L:p.M1177L
'CENPE'	Compound-het-het	4	104082545	104082545	T	C	het	c.A1837G:c.A1912G	p.K613E:p.K638E
'CENPE'	Compound-het-het	4	104117108	104117108	G	C	het	c.C326G	p.A109G
'CENPJ'	Compound-het-het	13	25479605	25479605	G	C	het	c.C2571G	p.S857R
'CENPJ'	Compound-het-het	13	25479878	25479878	A	T	het	c.T2298A	p.D766E
'CENPT'	Compound-het-het	16	67863341	67863341	G	A	het	c.C1265T:c.C1100T	p.A422V:p.A367V
'CENPT'	Compound-het-het	16	67865499	67865499	A	G	het	c.T490C	p.X164R
'CENPVL3'	Recessive	X	51361739	51361739	T	G	hom	c.A32C	p.E11A
'CENPVP1'	Recessive	X	51361739	51361739	T	G	hom	c.A32C	p.E11A
'CENPVP3'	Recessive	X	51361739	51361739	T	G	hom	c.A32C	p.E11A
'CEP104'	Compound-het-het	1	3756281	3756281	T	C	het	c.A452G:c.A626G	p.E151G:p.E209G
'CEP104'	Compound-het-het	1	3761487	3761487	C	G	het	c.G376C:c.G550C	p.E126Q:p.E184Q
'CEP120'	Compound-het-het	5	122725761	122725761	T	C	het	c.A1112G:c.A1034G	p.K371R:p.K345R
'CEP128'	Compound-het-het	14	81244362	81244362	G	C	het	c.C2240G	p.A747G
'CEP128'	Compound-het-het	14	81259434	81259434	C	A	het	c.G1230T	p.E410D
'CEP131'	Compound-het-het	17	79165016	79165016	C	G	het	c.G1074C:c.G2634C:c.G2643C:c.G2751C:c.G2742C	p.E358D:p.E878D:p.E881D:p.E917D:p.E914D
'CEP131'	Compound-het-het	17	79165016	79165016	C	G	het	c.G1074C:c.G2634C:c.G2643C:c.G2751C:c.G2742C	p.E358D:p.E878D:p.E881D:p.E917D:p.E914D
'CEP131'	Compound-het-het	17	79165016	79165016	C	G	het	c.G1074C:c.G2634C:c.G2643C:c.G2751C:c.G2742C	p.E358D:p.E878D:p.E881D:p.E917D:p.E914D
'CEP131'	Compound-het-het	17	79182738	79182738	C	T	het	c.G262A	p.G88S
'CEP152'	Compound-het-het	15	49030567	49030567	A	-	het	c.4844delT:c.5012delT	p.F1615Sfs*4:p.F1671Sfs*4
'CEP152'	Compound-het-het	15	49076311	49076311	T	C	het	c.A901G:c.A1180G	p.I301V:p.I394V
'CEP152'	Compound-het-het	15	49081189	49081189	T	G	het	c.A703C:c.A982C	p.K235Q:p.K328Q
'CEP152'	Compound-het-het	15	49083481	49083481	T	G	het	c.A646C:c.A925C	p.K216Q:p.K309Q
'CEP152'	Compound-het-het	15	49085583	49085583	A	G	het	c.T488C:c.T767C	p.I163T:p.I256T
'CEP152'	Compound-het-het	15	49088254	49088254	C	T	het	c.G365A:c.G644A	p.S122N:p.S215N
'CEP152'	Compound-het-het	15	49089694	49089694	C	T	het	c.G344A	p.R115Q
'CEP164'	Compound-het-het	11	117234167	117234167	C	A	het	c.C710A	p.P237H
'CEP164'	Compound-het-het	11	117261579	117261579	G	A	het	c.G2021A	p.R674Q
'CEP164'	Compound-het-het	11	117280762	117280762	T	C	het	c.T2452C	p.C818R
'CEP164'	Compound-het-het	11	117232552	117232552	C	G	het	c.C257G:c.C395G	p.A86G:p.A132G
'CEP164'	Compound-het-het	11	117252487	117252487	C	A	het	c.C1480A	p.P494T
'CEP170B'	Compound-het-het	14	105350222	105350222	C	T	het	c.C896T:c.C1106T:c.C1109T	p.A299V:p.A369V:p.A370V
'CEP170B'	Compound-het-het	14	105352944	105352944	G	A	het	c.G2158A:c.G2368A:c.G2371A	p.G720R:p.G790R:p.G791R
'CEP192'	Compound-het-het	18	13018509	13018509	T	C	het	c.T820C	p.F274L
'CEP192'	Compound-het-het	18	13018509	13018509	T	C	het	c.T820C	p.F274L
'CEP192'	Compound-het-het	18	13056046	13056046	G	A	het	c.G2032A:c.G2257A:c.G2680A:c.G1669A:c.G3457A	p.V678I:p.V753I:p.V894I:p.V557I:p.V1153I
'CEP192'	Compound-het-het	18	13096186	13096186	A	G	het	c.A5012G:c.A5237G:c.A4649G:c.A6437G	p.D1671G:p.D1746G:p.D1550G:p.D2146G
'CEP250'	Compound-het-het	20	34067081	34067081	C	T	het	c.C2120T	p.T707M
'CEP250'	Compound-het-het	20	34067081	34067081	C	T	het	c.C2120T	p.T707M
'CEP250'	Compound-het-het	20	34091338	34091338	A	C	het	c.A605C:c.A4973C:c.A5141C	p.K202T:p.K1658T:p.K1714T
'CEP250'	Compound-het-het	20	34078517	34078517	G	A	het	c.G2641A	p.E881K
'CEP250'	Compound-het-het	20	34092213	34092213	G	A	het	c.G1480A:c.G5848A:c.G6016A	p.D494N:p.D1950N:p.D2006N
'CEP290'	Compound-het-het	12	88496779	88496779	T	C	het	c.A7G:c.A2086G:c.A2833G:c.A2827G	p.I3V:p.I696V:p.I945V:p.I943V
'CEP290'	Compound-het-het	12	88496779	88496779	T	C	het	c.A7G:c.A2086G:c.A2833G:c.A2827G	p.I3V:p.I696V:p.I945V:p.I943V
'CEP290'	Compound-het-het	12	88496779	88496779	T	C	het	c.A7G:c.A2086G:c.A2833G:c.A2827G	p.I3V:p.I696V:p.I945V:p.I943V
'CEP295'	Compound-het-het	11	93432817	93432817	G	A	het	c.G4739A	p.R1580H
'CEP295'	Compound-het-het	11	93433117	93433117	-	C	het	c.5039dupC	p.S1683Kfs*2
'CEP295NL'	Compound-het-het	17	76887105	76887105	T	C	het	c.A1481G	p.D494G
'CEP295NL'	Compound-het-het	17	76887610	76887610	C	T	het	c.G976A	p.A326T
'CEP295NL'	Compound-het-het	17	76886953	76886953	G	T	het	c.C1633A	p.Q545K
'CEP295NL'	Compound-het-het	17	76888044	76888044	C	G	het	c.G542C	p.R181T
'CEP44'	Compound-het-het	4	175224971	175224971	A	C	het	c.A355C	p.K119Q
'CEP44'	Compound-het-het	4	175224971	175224971	A	C	het	c.A355C	p.K119Q
'CEP72'	Recessive	5	637678	637678	G	T	hom	c.G951T	p.L317F
'CEP72'	Compound-het-het	5	633907	633907	G	A	het	c.G536A	p.C179Y
'CEP72'	Compound-het-het	5	640640	640640	G	A	het	c.G1460A	p.R487H
'CERK'	Compound-het-het	22	47091143	47091143	A	C	het	c.T419G:c.T1013G	p.V140G:p.V338G
'CERK'	Compound-het-het	22	47116877	47116877	C	T	het	c.G178A	p.V60I
'CERS4'	Compound-het-het	19	8319453	8319453	G	A	het	c.G244A:c.G91A	p.A82T:p.A31T
'CERS4'	Compound-het-het	19	8320518	8320518	T	C	het	c.T319C:c.T166C	p.C107R:p.C56R
'CERS4'	Compound-het-het	19	8319453	8319453	G	A	het	c.G244A:c.G91A	p.A82T:p.A31T
'CERS4'	Compound-het-het	19	8320518	8320518	T	C	het	c.T319C:c.T166C	p.C107R:p.C56R
'CERS5'	Compound-het-het	12	50536927	50536927	T	G	het	c.A258C:c.A364C:c.A190C	p.K86N:p.I122L:p.I64L
'CFAP100'	Compound-het-het	3	126137966	126137966	G	A	het	c.G701A:c.G698A	p.R234Q:p.R233Q
'CFAP206'	Compound-het-het	6	88173849	88173849	A	T	het	c.A1750T	p.R584W
'CFAP46'	Compound-het-het	10	134712230	134712230	G	A	het	c.C1301T	p.P434L
'CFAP46'	Compound-het-het	10	134692953	134692953	C	T	het	c.G3982A	p.A1328T
'CFAP46'	Compound-het-het	10	134692971	134692971	A	G	het	c.T3964C	p.C1322R
'CFAP46'	Compound-het-het	10	134692953	134692953	C	T	het	c.G3982A	p.A1328T
'CFAP46'	Compound-het-het	10	134692971	134692971	A	G	het	c.T3964C	p.C1322R
'CFAP46'	Compound-het-het	10	134663846	134663846	G	A	het	c.C337T:c.C5854T	p.R113C:p.R1952C
'CFAP46'	Compound-het-het	10	134713049	134713049	C	T	het	c.G3046A	p.E1016K
'CFAP46'	Compound-het-het	10	134663846	134663846	G	A	het	c.C337T:c.C5854T	p.R113C:p.R1952C
'CFAP46'	Compound-het-het	10	134713049	134713049	C	T	het	c.G3046A	p.E1016K
'CFAP46'	Compound-het-het	10	134622301	134622301	C	T	het	c.G2255A:c.G7772A	p.R752Q:p.R2591Q
'CFAP46'	Compound-het-het	10	134650334	134650334	G	A	het	c.C1006T:c.C6523T	p.L336F:p.L2175F
'CFAP46'	Compound-het-het	10	134698654	134698654	C	T	het	c.G3580A	p.V1194M
'CFAP46'	Compound-het-het	10	134712578	134712578	C	T	het	c.G3104A	p.R1035Q
'CFAP46'	Compound-het-het	10	134698654	134698654	C	T	het	c.G3580A	p.V1194M
'CFAP46'	Compound-het-het	10	134712578	134712578	C	T	het	c.G3104A	p.R1035Q
'CFAP47'	Recessive	X	35985927	35985927	A	G	hom	c.A1792G	p.K598E
'CFAP47'	Recessive	X	36385131	36385131	T	G	hom	c.T1412G:c.T2267G	p.F471C:p.F756C
'CFAP47'	Recessive	X	36385131	36385131	T	G	hom	c.T1412G:c.T2267G	p.F471C:p.F756C
'CFAP47'	Recessive	X	36254852	36254852	A	T	hom	c.A401T	p.D134V
'CFAP47'	Recessive	X	36368163	36368163	A	C	hom	c.A952C:c.A1807C	p.I318L:p.I603L
'CFAP52'	Compound-het-het	17	9497560	9497560	C	T	het	c.C254T:c.C488T:c.C458T	p.A85V:p.A163V:p.A153V
'CFAP52'	Compound-het-het	17	9532122	9532122	A	-	het	c.955delA:c.1189delA:c.1159delA	p.S320Afs*21:p.S398Afs*21:p.S388Afs*21
'CFAP54'	Compound-het-het	12	96986387	96986387	A	C	het	c.A3332C	p.K1111T
'CFAP54'	Compound-het-het	12	97015375	97015375	G	A	het	c.G3647A	p.R1216H
'CFAP97'	Compound-het-het	4	186084022	186084022	G	A	het	c.C1529T	p.A510V
'CFHR1'	Compound-het-het	1	196748358	196748358	A	G	het	c.A125G	p.Y42C
'CFTR'	Compound-het-het	7	117230454	117230454	G	C	het	c.G1637C:c.G1544C:c.G1727C	p.G546A:p.G515A:p.G576A
'CFTR'	Compound-het-het	7	117232223	117232223	C	T	het	c.C1912T:c.C1819T:c.C2002T	p.R638C:p.R607C:p.R668C
'CFTR'	Compound-het-het	7	117149143	117149143	C	T	het	c.C220T	p.R74W
'CFTR'	Compound-het-het	7	117282582	117282582	G	A	het	c.G3718A:c.G3625A:c.G3808A	p.D1240N:p.D1209N:p.D1270N
'CFTR'	Compound-het-het	7	117149143	117149143	C	T	het	c.C220T	p.R74W
'CFTR'	Compound-het-het	7	117282582	117282582	G	A	het	c.G3718A:c.G3625A:c.G3808A	p.D1240N:p.D1209N:p.D1270N
'CFTR'	Compound-het-het	7	117199645	117199647	TCT	-	het	c.1430_1432del:c.1337_1339del:c.1520_1522del	p.F478del:p.F447del:p.F508del
'CFTR'	Compound-het-het	7	117250664	117250664	T	C	het	c.T2990C:c.T2897C:c.T3080C	p.I997T:p.I966T:p.I1027T
'CFTR'	Compound-het-het	7	117199645	117199647	TCT	-	het	c.1430_1432del:c.1337_1339del:c.1520_1522del	p.F478del:p.F447del:p.F508del
'CFTR'	Compound-het-het	7	117250664	117250664	T	C	het	c.T2990C:c.T2897C:c.T3080C	p.I997T:p.I966T:p.I1027T
'CFTR'	Compound-het-het	7	117230454	117230454	G	C	het	c.G1637C:c.G1544C:c.G1727C	p.G546A:p.G515A:p.G576A
'CFTR'	Compound-het-het	7	117232223	117232223	C	T	het	c.C1912T:c.C1819T:c.C2002T	p.R638C:p.R607C:p.R668C
'CGB'	Compound-het-het	19	49526360	49526360	C	T	het	c.G281A:c.G239A	p.R94H:p.R80H
'CGB'	Compound-het-het	19	49526360	49526360	C	T	het	c.G281A:c.G239A	p.R94H:p.R80H
'CGB2'	Compound-het-het	19	49535827	49535827	C	T	het	c.C76T:c.C40T	p.R26W:p.R14W
'CGB3'	Compound-het-het	19	49526360	49526360	C	T	het	c.G281A:c.G239A	p.R94H:p.R80H
'CGB3'	Compound-het-het	19	49526360	49526360	C	T	het	c.G281A:c.G239A	p.R94H:p.R80H
'CGN'	Compound-het-het	1	151502978	151502978	A	G	het	c.A2327G	p.Q776R
'CGN'	Compound-het-het	1	151505035	151505035	G	A	het	c.G2729A	p.R910Q
'CHADL'	Compound-het-het	22	41634021	41634021	G	A	het	c.C1055T	p.P352L
'CHADL'	Compound-het-het	22	41634031	41634031	C	T	het	c.G1045A	p.A349T
'CHAT'	Compound-het-het	10	50873067	50873067	G	A	het	c.G2222A:c.G1868A:c.G1976A	p.R741K:p.R623K:p.R659K
'CHAT'	Compound-het-het	10	50873067	50873067	G	A	het	c.G2222A:c.G1868A:c.G1976A	p.R741K:p.R623K:p.R659K
'CHCHD6'	Compound-het-het	3	126676278	126676278	G	A	het	c.G586A:c.G589A	p.V196I:p.V197I
'CHCHD6'	Compound-het-het	3	126676329	126676329	C	T	het	c.C637T:c.C640T	p.H213Y:p.H214Y
'CHCHD6'	Compound-het-het	3	126676278	126676278	G	A	het	c.G586A:c.G589A	p.V196I:p.V197I
'CHCHD6'	Compound-het-het	3	126676329	126676329	C	T	het	c.C637T:c.C640T	p.H213Y:p.H214Y
'CHD1L'	Compound-het-het	1	146759387	146759387	A	G	het	c.A1683G:c.A1452G:c.A2013G:c.A2295G	p.I561M:p.I484M:p.I671M:p.I765M
'CHD1L'	Compound-het-het	1	146759387	146759387	A	G	het	c.A1683G:c.A1452G:c.A2013G:c.A2295G	p.I561M:p.I484M:p.I671M:p.I765M
'CHD3'	Recessive	17	7788383	7788383	-	CCGCCGCCC	hom	c.259_260insCCGCCGCCC	p.P87_P88insAAP
'CHFR'	Recessive	12	133438197	133438197	G	A	hom	c.C367T:c.C607T:c.C223T:c.C643T:c.C520T	p.P123S:p.P203S:p.P75S:p.P215S:p.P174S
'CHI3L2'	Compound-het-het	1	111784951	111784951	G	A	het	c.G517A:c.G1108A:c.G901A:c.G1138A	p.V173I:p.V370I:p.V301I:p.V380I
'CHMP1A'	Compound-het-het	16	89712997	89712997	G	A	het	c.C487T	p.R163X
'CHRDL1'	Compound-het-het	X	109937483	109937483	G	A	het	c.C446T:c.C683T:c.C686T:c.C665T	p.A149V:p.A228V:p.A229V:p.A222V
'CHRDL1'	Compound-het-het	X	110005943	110005943	C	T	het	c.G187A:c.G169A	p.V63M:p.V57M
'CHRDL2'	Compound-het-het	11	74441891	74441891	C	T	het	c.G43A	p.A15T
'CHRM3'	Compound-het-het	1	240071937	240071937	C	A	het	c.C1186A	p.L396M
'CHRM3'	Compound-het-het	1	240072043	240072043	T	C	het	c.T1292C	p.L431P
'CHRM3'	Compound-het-het	1	240071937	240071937	C	A	het	c.C1186A	p.L396M
'CHRM3'	Compound-het-het	1	240072043	240072043	T	C	het	c.T1292C	p.L431P
'CHRNA2'	Compound-het-het	8	27321229	27321229	T	C	het	c.A731G:c.A686G	p.K244R:p.K229R
'CHRNA2'	Compound-het-het	8	27321250	27321250	G	T	het	c.C710A:c.C665A	p.T237K:p.T222K
'CHTF18'	Compound-het-het	16	839666	839666	T	G	het	c.T641G:c.T557G:c.T560G:c.T1148G	p.V214G:p.V186G:p.V187G:p.V383G
'CHTF18'	Compound-het-het	16	839666	839666	T	G	het	c.T641G:c.T557G:c.T560G:c.T1148G	p.V214G:p.V186G:p.V187G:p.V383G
'CHTF18'	Compound-het-het	16	839666	839666	T	G	het	c.T641G:c.T557G:c.T560G:c.T1148G	p.V214G:p.V186G:p.V187G:p.V383G
'CHTF18'	Compound-het-het	16	839666	839666	T	G	het	c.T641G:c.T557G:c.T560G:c.T1148G	p.V214G:p.V186G:p.V187G:p.V383G
'CHTF18'	Recessive	16	838408	838410	CCC	-	hom	c.315_317del	p.P108del
'CIAO3'	Compound-het-het	16	787238	787238	A	G	het	c.T254C	p.L85P
'CIITA'	Compound-het-het	16	10998613	10998613	C	A	het	c.C803A:c.C950A	p.S268Y:p.S317Y
'CIITA'	Compound-het-het	16	11002035	11002035	T	A	het	c.T2542A:c.T2686A	p.S848T:p.S896T
'CILP2'	Compound-het-het	19	19655657	19655657	C	G	het	c.C2303G:c.C2321G	p.A768G:p.A774G
'CILP2'	Compound-het-het	19	19656556	19656556	A	G	het	c.A3202G:c.A3220G	p.S1068G:p.S1074G
'CIRBP'	Compound-het-het	19	1273577	1273577	G	A	het	c.G587A	p.R196Q
'CKAP2'	Compound-het-het	13	53036553	53036553	A	G	het	c.A1156G:c.A1159G:c.A1012G	p.N386D:p.N387D:p.N338D
'CKAP4'	Compound-het-het	12	106641399	106641407	GCCGCCGCC	-	het	c.223_231del	p.G75_G77del
'CLASRP'	Compound-het-het	19	45561014	45561014	A	G	het	c.A191G	p.Q64R
'CLCC1'	Compound-het-het	1	109479829	109479829	C	T	het	c.G698A:c.G890A:c.G1103A:c.G1253A	p.G233D:p.G297D:p.G368D:p.G418D
'CLCC1'	Compound-het-het	1	109486553	109486553	T	C	het	c.A466G	p.S156G
'CLCN2'	Compound-het-het	3	184070569	184070569	G	A	het	c.C2041T:c.C2173T:c.C2122T	p.R681W:p.R725W:p.R708W
'CLCN2'	Compound-het-het	3	184070569	184070569	G	A	het	c.C2041T:c.C2173T:c.C2122T	p.R681W:p.R725W:p.R708W
'CLCN5'	Recessive	X	49851301	49851301	A	G	hom	c.A1121G:c.A1331G	p.N374S:p.N444S
'CLCNKA'	Compound-het-het	1	16354581	16354581	C	T	het	c.C806T:c.C935T	p.T269I:p.T312I
'CLCNKA'	Compound-het-het	1	16355292	16355292	C	T	het	c.C876T:c.C1005T	p.L292L:p.L335L
'CLCNKA'	Compound-het-het	1	16357159	16357159	C	T	het	c.C1483T:c.C1612T	p.R495C:p.R538C
'CLDN23'	Compound-het-het	8	8560619	8560619	-	CAAGCC	het	c.711_712insCAAGCC	p.R237_K238insQA
'CLDN23'	Compound-het-het	8	8560619	8560619	-	CAAGCC	het	c.711_712insCAAGCC	p.R237_K238insQA
'CLDND2'	Compound-het-het	19	51870422	51870422	T	C	het	c.A478G	p.I160V
'CLEC16A'	Compound-het-het	16	11220123	11220123	G	A	het	c.G2707A	p.A903T
'CLEC16A'	Compound-het-het	16	11250445	11250445	G	A	het	c.G235A	p.A79T
'CLEC18B'	Compound-het-het	16	74445632	74445632	C	T	het	c.G919A	p.D307N
'CLEC18B'	Compound-het-het	16	74446104	74446104	C	G	het	c.G825C	p.E275D
'CLEC18B'	Compound-het-het	16	74445632	74445632	C	T	het	c.G919A	p.D307N
'CLEC18B'	Compound-het-het	16	74446104	74446104	C	G	het	c.G825C	p.E275D
'CLEC18C'	Recessive	16	70208251	70208251	G	A	hom	c.G70A	p.A24T
'CLEC1A'	Compound-het-het	12	10226001	10226001	C	T	het	c.G277A:c.G454A:c.G553A	p.A93T:p.A152T:p.A185T
'CLEC1A'	Compound-het-het	12	10226001	10226001	C	T	het	c.G277A:c.G454A:c.G553A	p.A93T:p.A152T:p.A185T
'CLIC5'	Compound-het-het	6	45909356	45909356	T	C	het	c.A811G:c.A334G	p.N271D:p.N112D
'CLIC5'	Compound-het-het	6	46047748	46047748	C	T	het	c.G232A	p.D78N
'CLIC6'	Compound-het-het	21	36042666	36042666	G	T	het	c.G979T	p.A327S
'CLIC6'	Compound-het-het	21	36043001	36043001	C	A	het	c.C1314A	p.D438E
'CLIC6'	Compound-het-het	21	36042666	36042666	G	T	het	c.G979T	p.A327S
'CLIC6'	Compound-het-het	21	36043001	36043001	C	A	het	c.C1314A	p.D438E
'CLIC6'	Compound-het-het	21	36042666	36042666	G	T	het	c.G979T	p.A327S
'CLIC6'	Compound-het-het	21	36043001	36043001	C	A	het	c.C1314A	p.D438E
'CLIP4'	Compound-het-het	2	29366627	29366627	C	T	het	c.C380T:c.C701T	p.P127L:p.P234L
'CLIP4'	Compound-het-het	2	29366627	29366627	C	T	het	c.C380T:c.C701T	p.P127L:p.P234L
'CLUL1'	Compound-het-het	18	641363	641363	A	G	het	c.A1031G:c.A1106G:c.A1187G	p.D344G:p.D369G:p.D396G
'CMAHP'	Compound-het-het	6	25087124	25087124	G	A	het	c.C1234T	p.H412Y
'CMAHP'	Compound-het-het	6	25092215	25092215	T	C	het	c.A1139G	p.N380S
'CNGA4'	Compound-het-het	11	6265569	6265569	A	T	het	c.A1658T	p.E553V
'CNGA4'	Compound-het-het	11	6265569	6265569	A	T	het	c.A1658T	p.E553V
'CNGA4'	Compound-het-het	11	6263079	6263079	C	G	het	c.C643G	p.L215V
'CNGA4'	Compound-het-het	11	6265584	6265584	C	A	het	c.C1673A	p.T558N
'CNGB1'	Compound-het-het	16	57921881	57921881	C	T	het	c.G3340A:c.G3322A	p.A1114T:p.A1108T
'CNGB1'	Compound-het-het	16	57931393	57931393	C	-	het	c.3150delG:c.3132delG	p.F1051Lfs*12:p.F1045Lfs*12
'CNGB3'	Compound-het-het	8	87638297	87638297	A	T	het	c.T1492A	p.L498M
'CNGB3'	Compound-het-het	8	87638297	87638297	A	T	het	c.T1492A	p.L498M
'CNGB3'	Compound-het-het	8	87588042	87588042	G	C	het	c.C2420G	p.A807G
'CNGB3'	Compound-het-het	8	87588154	87588154	C	A	het	c.G2308T	p.V770F
'CNN1'	Compound-het-het	19	11658682	11658682	C	T	het	c.C461T:c.C401T:c.C311T	p.P154L:p.P134L:p.P104L
'CNTN5'	Compound-het-het	11	100168410	100168410	T	A	het	c.T2146A:c.T2368A	p.L716I:p.L790I
'CNTNAP3B'	Compound-het-het	9	43853533	43853533	G	T	het	c.G1514T:c.G1793T	p.R505L:p.R598L
'CNTNAP3B'	Compound-het-het	9	43894176	43894176	C	T	het	c.C2852T	p.T951M
'CNTNAP3B'	Compound-het-het	9	43819655	43819655	A	G	het	c.A1117G	p.T373A
'CNTNAP3B'	Compound-het-het	9	43894176	43894176	C	T	het	c.C2852T	p.T951M
'CNTNAP3B'	Compound-het-het	9	43915396	43915396	C	T	het	c.C3479T	p.A1160V
'CNTNAP3B'	Recessive	9	43920356	43920356	A	G	hom	c.A3853G	p.K1285E
'CNTNAP3B'	Recessive	9	43876136	43876136	A	T	hom	c.A2228T	p.Q743L
'CNTNAP3B'	Compound-het-het	9	43853559	43853559	A	G	het	c.A1540G:c.A1819G	p.I514V:p.I607V
'CNTNAP3B'	Compound-het-het	9	43920260	43920260	G	A	het	c.G3757A	p.V1253M
[truncated: 21,711 more rows]
